# Supplementary material for: 1-Titanacyclobuta-2,3-diene – an elusive four-membered cyclic allene
Source: Royal Society of Chemistry journal article supplement (doi:10.1039/c9sc01002e), 2019-01-01
Supplement: c9sc01002e1.pdf [file c9sc01002e1.pdf]

Supporting Information

# 1-Titanacyclobuta-2,3-diene – an Elusive Four-membered Cyclic Allene

Fabian Reiß\*,<sup>[a]</sup> Melanie Reiß,<sup>[a]</sup> Jonas Bresien,<sup>[b]</sup> Anke Spannenberg,<sup>[a]</sup> Haijun Jiao,<sup>[a]</sup> Wolfgang Baumann,<sup>[a]</sup>  
Perdita Arndt,<sup>[a]</sup> and Torsten Beweries\*<sup>[a]</sup>

<sup>[a]</sup> Leibniz-Institut für Katalyse e.V. an der Universität Rostock, Albert-Einstein-Str. 29a, 18059 Rostock,  
Germany.

<sup>[b]</sup> Abteilung für Anorganische Chemie, Institut für Chemie, Universität Rostock, Albert-Einstein-Straße 3a, D-18059  
Rostock, Germany

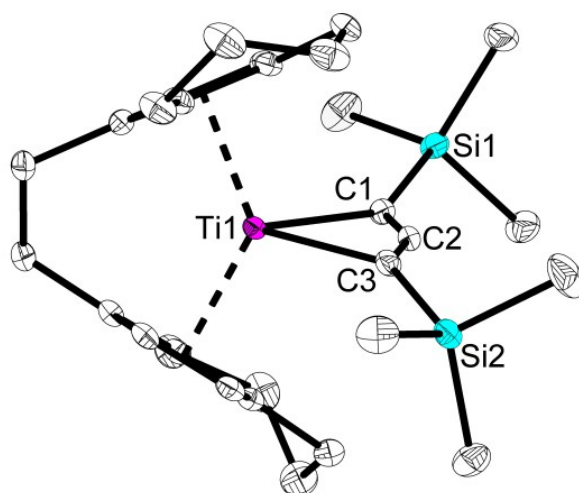

## Content

|                                                  |    |
|--------------------------------------------------|----|
| 1. Experimental Details .....                    | 2  |
| 2. Reaction of 2 with ketones and aldehydes..... | 5  |
| 3. Proof of Stability of Compound 2 .....        | 11 |
| 4. Crystallographic Details .....                | 12 |
| 5. Details of the NMR spectroscopy .....         | 18 |
| 6. Details of vibrational spectroscopy .....     | 30 |
| 7. Computational Details.....                    | 39 |
| 8. Literature.....                               | 56 |

## 1. Experimental Details

### 1.1. General

All manipulations were carried out in an oxygen- and moisture-free argon atmosphere using standard Schlenk and drybox techniques. The solvents were purified with the Grubbs-type column system "Pure Solv MD-5" and dispensed into thick-walled glass Schlenk bombs equipped with Young-type Teflon valve stopcocks. Bis(cyclopentadienyl)titanium(IV) dichloride ( $[\text{Cp}_2\text{TiCl}_2]$ , 97 %, Sigma-Aldrich) was recrystallised prior to use. Bis(pentamethylcyclopentadienyl)titanium(IV) dichloride ( $[\text{Cp}^*\text{TiCl}_2]$ , MCAT) and *rac*-[1,2-bis-(4,5,6,7-tetra-hydro-inden-1-yl)ethan]titanium(IV) dichloride ( $[\text{rac}(\text{ebthi})\text{TiCl}_2]$ , MCAT) were transferred in Schlenk Tubes stored under argon and used as received.  $[\text{Li}_2(\text{Me}_3\text{SiC}_3\text{SiMe}_3)]$  was prepared according to literature procedure and isolated as white solid.<sup>1</sup> Preparative chromatography was performed by elution from columns of slurry-packed Silica Gel 60 (0.04-0.063 mm, Macherey-Nagel GmbH). NMR spectra were determined on Bruker AV300 and AV400.  $^1\text{H}$  and  $^{13}\text{C}$  chemical shifts were referenced to the solvent signal:  $[\text{D}_6]$ benzene ( $\delta_{\text{H}}$  7.16,  $\delta_{\text{C}}$  128.06)<sup>2</sup>,  $[\text{D}_8]$ toluene ( $\delta_{\text{H}}$  2.08,  $\delta_{\text{C}}$  20.4) Accordingly, chemical shifts of  $^{29}\text{Si}$  are given relative to  $\text{SiMe}_4$ ,  $\Delta(^{29}\text{Si}) = 19.867\ 187$  MHz. Raman spectra were recorded on a LabRAM HR 800 Raman Horiba spectrometer equipped with an Olympus BX41 microscope with variable lenses was used. The samples were excited by different laser sources: 633 nm (17 mW, air cooled), 784 nm Laser diode (100 mW, air-cooled) or 473 nm Ar+ Laser (20 mW, air-cooled). All measurements were carried out at ambient temperature. IR spectra were recorded on a Bruker Alpha FT-IR, ATR Spectrometer, spectra are not corrected. MS analysis was done using a Finnigan MAT 95-XP (Thermo-Electron),  $\text{Cl}^+/\text{Cl}^-$  Isobutane and for the air stable compounds in EI mode. CHN analysis was done using a Leco Tru Spec elemental analyser. Melting points are uncorrected and were determined in sealed capillaries under Ar atmosphere using a Mettler-Toledo MP 70. Data were collected on a STOE IPDS II (**3**) and a Bruker Kappa APEX II Duo diffractometer (**2**), respectively. The structures were solved by direct methods (SHELXS-97)<sup>3</sup> and refined by full-matrix least-squares procedures on  $F^2$  (SHELXL-2014).<sup>4</sup> XP (Bruker AXS) and Diamond<sup>5</sup> were used for graphical representations. All calculations were carried out with the Gaussian 09 package of molecular orbital programs.<sup>6</sup>

### 1.2. Reaction of $\text{Cp}^*\text{TiCl}_2$ with $[\text{Li}_2(\text{Me}_3\text{SiC}_3\text{SiMe}_3)]$ to (E)-hexa-3-en-1,5-diyne-1,3,4,6-tetra-yltetrakis(trimethylsilane) (**1**)

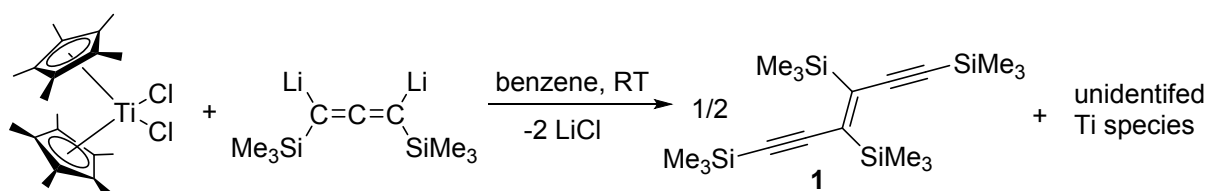

$\text{Cp}^*\text{TiCl}_2$  (0.51 mmol, 0.200 g) and  $[\text{Li}_2(\text{Me}_3\text{SiC}_3\text{SiMe}_3)]$  (0.51 mmol, 0.100 g) were mixed and dissolved in benzene (5 mL). After 12 hours of stirring at room temperature the solvent was removed in *vacuo*. Then the brown residue was extracted with pentane (5 x 4 mL) and cannula-filtered. Silica Gel was added to the combined pentane solutions. After removing the solvent the product **1** was separated by column chromatography (hexane). Yield 64 mg, 90 %.

**m.p.** 85–87 °C (air).  $^1\text{H NMR}$  (25 °C,  $[\text{D}_6]$ benzene, 400.13 MHz):  $\delta = 0.47$  (s, 18H,  $^2J(^1\text{H}-^{29}\text{Si}) = 6.8$  Hz,  $^1J(^1\text{H}-^{13}\text{C}) = 120$  Hz, 2 x  $\text{SiMe}_3$ -C3), 0.19 (s, 18H,  $^2J(^1\text{H}-^{29}\text{Si}) = 7.0$  Hz,  $^1J(^1\text{H}-^{13}\text{C}) = 120$  Hz, 2 x  $\text{SiMe}_3$ -

C1).  $^{13}\text{C}$  NMR (25 °C,  $[\text{D}_6]$ benzene, 100.61 MHz):  $\delta = 150.5$  (2 x C3), 111.5 (2 x C1), 109.0 (2 x C2), -0.2 (2 x  $\text{SiMe}_3\text{-C1}$ ), -0.8 (2 x  $\text{SiMe}_3\text{-C3}$ ).  $^{29}\text{Si}$ -inept NMR (25 °C,  $[\text{D}_6]$ benzene, 59.63 MHz):  $\delta = -4.7$  (dec,  $^2J(^1\text{H-}^{29}\text{Si}) = 6.8$  Hz, 2 x  $\text{SiMe}_3$ ), -18.9 (dec,  $^2J(^1\text{H-}^{29}\text{Si}) = 7.0$  Hz, 2 x  $\text{SiMe}_3$ ). MS-Cl<sup>+</sup> (isobutane):  $[\text{M}^+]$  364 (23),  $[\text{M}+\text{H}^+]$  365 (100),  $[\text{M}-\text{Me}^+]$  349 (22). IR (ATR, 64 scans): 2955 (w), 2897 (w), 2121 (w), 1450 (w), 1242 (m), 1136 (w), 1105 (w), 830 (s), 754 (s), 730 (m), 696 (m), 636 (m), 618 (m), 532 (m), 449 (w). RAMAN (473 nm, 8 sec, 10 acc): 2959 (w), 2897 (w), 2099 (s), 2067 (w), 1462 (m), 1436 (w), 1257 (w), 1182 (w), 1140 (w), 755 (w), 721 (w), 694 (w), 632 (w), 615 (w), 586 (w), 385 (w). Elemental analysis calcd (%) for  $\text{M}(\text{C}_{18}\text{H}_{38}\text{Si}_4) = 364.83$  g mol<sup>-1</sup>: C 58.93, H 10.44; found: C 58.21, H 10.23 (measured with  $\text{V}_2\text{O}_5$ . Without  $\text{V}_2\text{O}_5$  C values decrease about 15 %).

### 1.3. Synthesis of 2

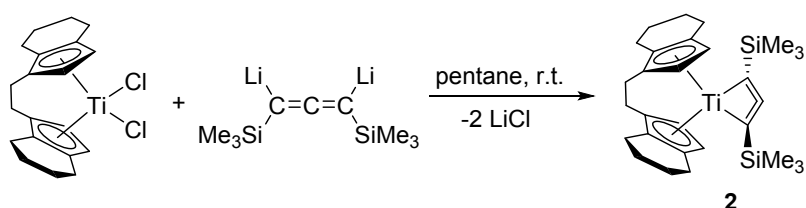

$[\text{rac}(\text{ebthi})\text{TiCl}_2]$  (0.52 mmol, 200 mg) and  $[\text{Li}_2(\text{Me}_3\text{SiC}_3\text{SiMe}_3)]$  (0.52 mmol, 101 mg) were mixed and dissolved in pentane (10 mL) at 0 °C. Then the reaction mixture was slowly warmed to room temperature. After 12 hours of stirring at room temperature the deep red solution was cannula-filtered and the residue was extracted with pentane (5 x 3 mL). The combined pentane solutions were concentrated and stored at -78 °C for crystallisation to obtain complex **2** (150 mg, 58 %).

**m.p.** 108 °C (dec. Ar).  $^1\text{H}$  NMR (25 °C,  $[\text{D}_6]$ benzene, 400.13 MHz):  $\delta = 7.22$  (d, 2H,  $^1J(^1\text{H-}^{13}\text{C}) = 172$  Hz,  $^3J(^1\text{H-}^1\text{H}) = 3.36$  Hz, CH ebthi), 5.27 (d, 2H,  $^1J(^1\text{H-}^{13}\text{C}) = 168$  Hz,  $^3J(^1\text{H-}^1\text{H}) = 3.36$  Hz, C-H ebthi), 2.72–2.52 (m, 4H, 2 x  $\text{CH}_2$  ebthi), 2.41–2.25 (m, 2H,  $\text{CH}_2$  ebthi), 2.05–1.87 (m, 4H, 2 x  $\text{CH}_2$  ebthi), 1.43–1.07 (m, 10H, 5 x  $\text{CH}_2$  ebthi), 0.35 (s, 18H,  $^2J(^1\text{H-}^{29}\text{Si}) = 6.6$  Hz, 2 x  $\text{SiMe}_3$ ).  $^{13}\text{C}$  NMR (25 °C,  $[\text{D}_6]$ benzene, 100.61 MHz):  $\delta = 213.8$  (C=C=C), 134.2 (C=C=C), 124.1, 122.9, 117.2 (3 x C ebthi), 116.5, 100.2 (2 x CH ebthi), 27.4, 24.0, 23.9, 23.1, 22.8 (10 x  $\text{CH}_2$  ebthi), 2.3 (2 x  $\text{SiMe}_3$ ).  $^{29}\text{Si}$ -inept NMR (25 °C,  $[\text{D}_6]$ benzene, 59.63 MHz):  $\delta = -11.28$  (dec,  $\text{Si}(\text{CH}_3)_3$ ,  $^2J(^1\text{H-}^{29}\text{Si}) = 6.6$  Hz). MS-Cl<sup>+</sup> (isobutane):  $[\text{M}^+]$  494 (26),  $[\text{M}-\text{TMS}^+]$  421 (21),  $[(\text{M} \times 2)^+]$  988 (100). IR (ATR, 16 scans): 2924 (w), 2897 (w), 2849 (w), 1729 (m), 1692 (w), 1433 (w), 1344 (m), 1285 (w), 1240 (m), 1036 (w), 1001 (w), 952 (w), 828 (s), 777 (m), 750 (s), 715 (m), 683 (m), 626 (m), 604 (w), 518 (w), 502 (m), 408 (m). RAMAN (samples of **2** decompose while irradiation with all available laser sources). Elemental analysis calcd (%) for  $\text{M}(\text{C}_{29}\text{H}_{42}\text{Si}_2\text{Ti}) = 494.69$  g mol<sup>-1</sup>: C 70.41, H 8.56; found: C 70.59, H 8.57. Single crystals suitable for single crystal diffraction were grown from pentane at room temperature.

#### 1.4. Reaction of $\text{Cp}_2\text{TiCl}_2$ with $[\text{Li}_2(\text{Me}_3\text{SiC}_3\text{SiMe}_3)]$ at ambient temperature.

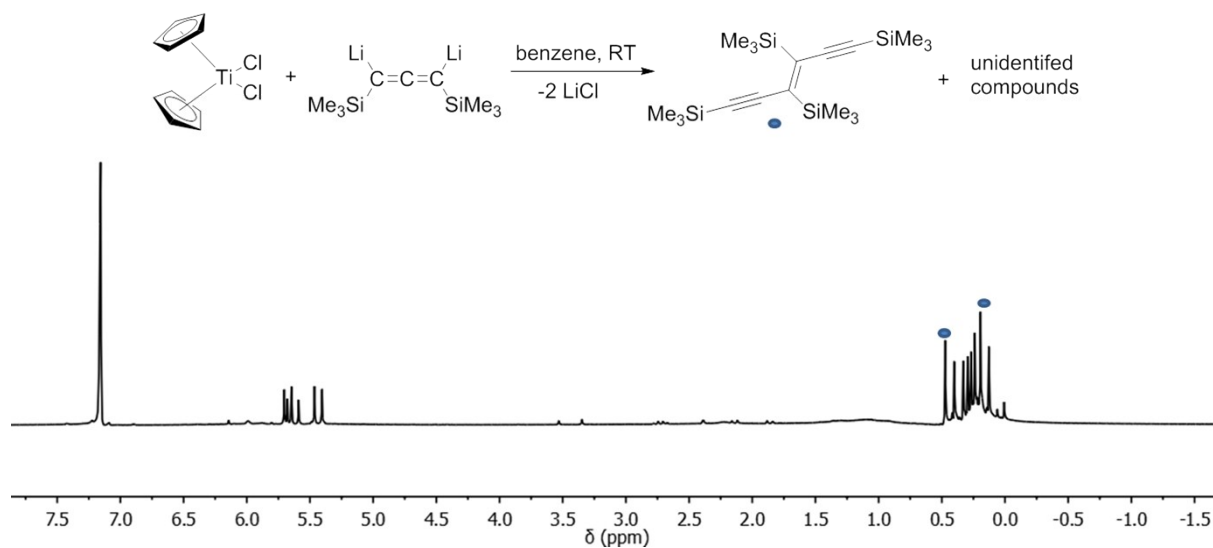

**Figure S 1:**  $^1\text{H}$  NMR spectrum of the reaction mixture after 12 h (25 °C,  $[\text{D}_6]$ benzene, 300.20 MHz).

$\text{Cp}_2\text{TiCl}_2$  (0.51 mmol, 0.200 g) and  $[\text{Li}_2(\text{Me}_3\text{SiC}_3\text{SiMe}_3)]$  (0.51 mmol, 0.100 g) were mixed and dissolved in benzene (5 mL). After 12 hours of stirring at room temperature an NMR sample was taken.

## 2. Reaction of 2 with ketones and aldehydes

### 2.1. Reaction of 2 with benzophenone to (4,4-diphenylbut-3-en-1-yne-1,3-diyl)bis(trimethylsilane) (3)

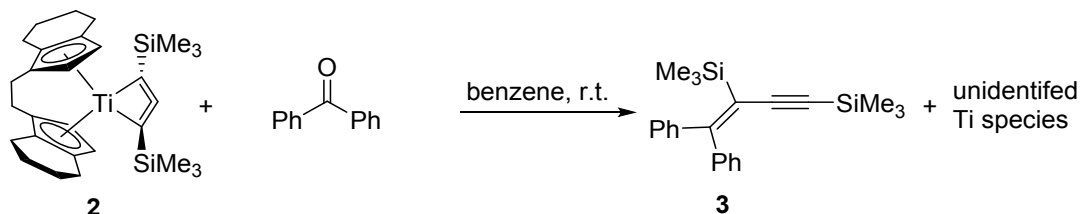

Compound **2** (0.20 mmol, 0.100 g) and benzophenone (0.20 mmol, 37 mg) were mixed and dissolved in benzene (2 mL). After 16 hours of stirring at room temperature the solvent was removed in *vacuo*. Then the brown residue was dissolved in pentane (5 mL) and Silica Gel was added. After removing the solvent the product **3** was separated by column chromatography (hexane/ethyl acetate 20 : 1). Yield 64 mg, 90 %.

**m.p.** 61–64 °C (in air). **<sup>1</sup>H NMR** (25 °C, [D<sub>6</sub>]benzene, 400.13 MHz):  $\delta$  = 7.65 (m, 2H, Ph), 7.06 (m, 8H, Ph), 0.17 (s, 9H,  $^2J(^1\text{H}-^{29}\text{Si}) = 7.0$  Hz, SiMe<sub>3</sub>), 0.12 (s, 9H,  $^2J(^1\text{H}-^{29}\text{Si}) = 6.6$  Hz, SiMe<sub>3</sub>). **<sup>13</sup>C NMR** (25 °C, [D<sub>6</sub>]benzene, 100.61 MHz):  $\delta$  = 162.8 (C4), 143.7, 142.9 (*i*-Ph), 130.4, 130.2 (Ph), 128–127 (4 signals of Ph under solvent signal), 123.2 (C3), 109.2 (C2), 101.7 (C1), 0.3 ((SiMe<sub>3</sub>)-C3), 0.0 ((SiMe<sub>3</sub>)-C1). **<sup>29</sup>Si-inept NMR** (25 °C, [D<sub>6</sub>]benzene, 59.63 MHz):  $\delta$  = -4.08 (dec, Si(CH<sub>3</sub>)<sub>3</sub>,  $^2J(^1\text{H}-^{29}\text{Si}) = 6.7$  Hz), -19.23 (dec, Si(CH<sub>3</sub>)<sub>3</sub>,  $^2J(^1\text{H}-^{29}\text{Si}) = 7.0$  Hz). **MS-EI**: [M<sup>+</sup>] 348 (100), [M<sup>+</sup>-Me] 333 (42). **IR** (32 scans, ATR): 3077 (w), 3048 (w), 3024 (w), 2957 (w), 2923 (w), 2895 (w), 2855 (w), 2117 (m), 1567 (w), 1535 (w), 1486 (w), 1442 (w), 1405 (w), 1311 (w), 1291 (w), 1244 (m), 1179 (w), 1105 (w), 1071 (w), 1028 (w), 936 (w), 907 (w), 832 (s), 752 (s), 693 (s), 628 (m), 605 (m), 559 (w), 493 (m), 465 (w). **RAMAN** (473 nm, 8 sec, 10 acc): 3067 (m), 3054 (w), 2959 (w), 2897 (m), 2120 (m), 1597 (m), 1576 (w), 1534 (s), 1491 (w), 1409 (w), 1290 (w), 1176 (w), 1155 (w), 1106 (w), 1026 (w), 998 (m), 837 (w), 755 (w), 689 (w), 639 (w), 613 (w), 603 (w), 535 (w), 495 (w), 403 (w). **Elemental analysis** calcd (%) for M(C<sub>22</sub>H<sub>28</sub>Si<sub>2</sub>) = 348.17 g mol<sup>-1</sup>: C 75.79, H 8.10; found: C 75.82, H 8.10. Single crystals suitable for single crystal diffraction were grown from pentane.

### 2.2. Reaction of 2 with acetone to (4-methylpent-3-en-1-yne-1,3-diyl)bis(trimethylsilane) (4)

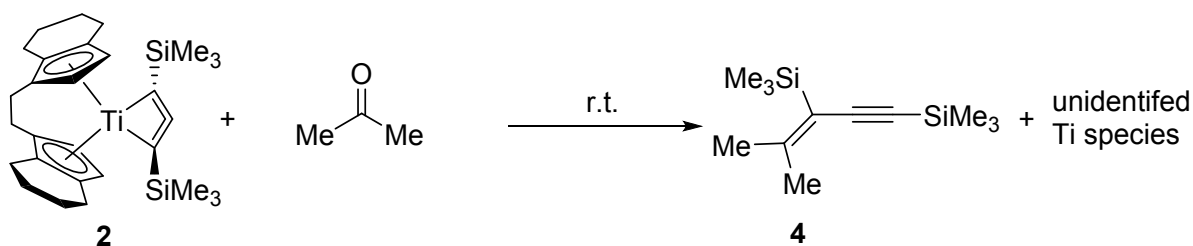

Compound **2** (0.30 mmol, 0.150 g) was dissolved in dry acetone (2 mL) at 0 °C. After 16 hours of stirring at room temperature, Silica Gel was added. After removing the solvent, the product **4** was separated by column chromatography (hexane) as colourless liquid. Yield 40 mg, 58 %.

**<sup>1</sup>H NMR** (25 °C, [D<sub>6</sub>]benzene, 400.13 MHz): δ = 2.03 (q, 3H, <sup>4</sup>J(<sup>1</sup>H-<sup>1</sup>H) = 0.38 Hz, J(<sup>1</sup>H-<sup>13</sup>C) = 126 Hz CH<sub>3</sub>), 1.63 (q, 3H, <sup>4</sup>J(<sup>1</sup>H-<sup>1</sup>H) = 0.38 Hz, J(<sup>1</sup>H-<sup>13</sup>C) = 126 Hz, CH<sub>3</sub>), 0.27 (s, 9H, <sup>2</sup>J(<sup>1</sup>H-<sup>29</sup>Si) = 6.4 Hz, J(<sup>1</sup>H-<sup>13</sup>C) = 119 Hz, (SiMe<sub>3</sub>)-C1), 0.25 (s, 9H, <sup>2</sup>J(<sup>1</sup>H-<sup>29</sup>Si) = 7.0 Hz, J(<sup>1</sup>H-<sup>13</sup>C) = 120 Hz, (SiMe<sub>3</sub>)-C3). **<sup>13</sup>C NMR** (25 °C, [D<sub>6</sub>]benzene, 100.61 MHz): δ = 158.6 (C4), 118.4 (C3), 108.5 (C2), 99.3 (C1), 25.6, 24.0 (2 x CH<sub>3</sub>), 0.6 ((SiMe<sub>3</sub>)-C3), 0.3 ((SiMe<sub>3</sub>)-C1). **<sup>29</sup>Si-inept NMR** (25 °C, [D<sub>6</sub>]benzene, 59.63 MHz): δ = -8.1 (dec, Si(CH<sub>3</sub>)<sub>3</sub>, <sup>2</sup>J(<sup>1</sup>H-<sup>29</sup>Si) = 6.6 Hz), -19.8 (dec, Si(CH<sub>3</sub>)<sub>3</sub>, <sup>2</sup>J(<sup>1</sup>H-<sup>29</sup>Si) = 7.0 Hz). **MS-EI<sup>+</sup>**: [M<sup>+</sup>] 224 (6), [M-H<sup>+</sup>] 223 (12), [M-C<sub>4</sub>H<sub>9</sub><sup>+</sup>] 167 (98), [M-SiMe<sub>3</sub><sup>+</sup>] 152 (15), [SiMe<sub>3</sub><sup>+</sup>] 73 (100). **IR** (32 scans, ATR): 2958 (w), 2899 (w), 2155 (w), 2117 (w), 1584 (w), 1444 (w), 1407 (w), 1368 (w), 1248 (m), 1128 (w), 1109 (w), 887 (w), 8334 (s), 756 (m), 693 (w), 634 (w), 614 (w), 455 cm<sup>-1</sup> (w). **RAMAN** (784 nm, 8 sec, 10 acc): 2961 (w), 2898 (w), 2156 (w), 2117 (m), 1631 (w), 1586 (w), 1440 (w), 1411 (w), 1377 (w), 1242 (w), 1129 (w), 1065 (w), 840 (w), 758 (w), 696 (m), 633 (s), 612 (w), 602 (w), 512 (w), 455 (w), 432 cm<sup>-1</sup> (w).

### 2.3. Reaction of **2** with acetophenone to *E/Z* isomere mixture of (4-phenylpent-3-en-1-yne-1,3-diyl)bis(trimethylsilane) (**5E** and **5Z**)

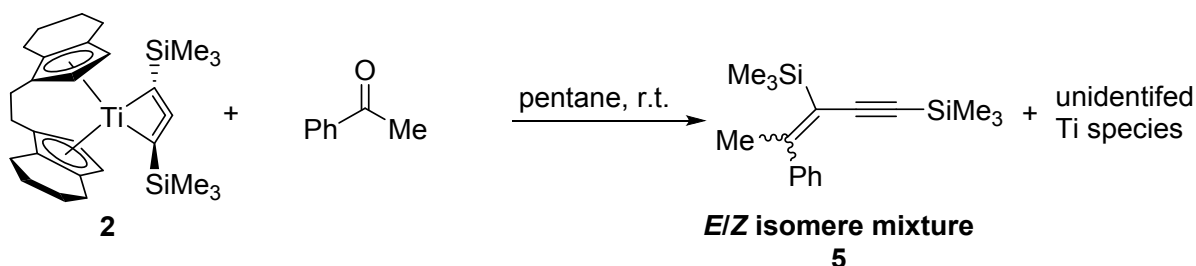

Compound **2** (0.20 mmol, 0.100 g) was dissolved in pentane (2 mL) and acetophenone (0.20 mmol, 24 mg) was added. After 16 hours of stirring at room temperature an NMR sample (*E/Z* ratio 0.8 : 1) was taken and then the solvent of the reaction mixture was removed in *vacuo*. Next, the orange residue was suspended in pentane (5 mL) and Silica Gel was added. After removing the solvent, the *E* and *Z* isomers (**5E** and **5Z**) were separated by column chromatography (hexane/ethyl acetate 20 : 1). Yield: 13 mg (**5E**), 13 mg (**5Z**), 46 %. **MS-EI<sup>+</sup>**: [M<sup>+</sup>] 286 (58), [M-Me<sup>+</sup>] 271 (59), [M-2Me<sup>+</sup>] 255 (29), [TMS] 73 (72).

**5Z: <sup>1</sup>H NMR** (25 °C, [D<sub>6</sub>]benzene, 400.13 MHz): δ = 7.01 (m, 5H, Ph), 2.40 (s, 3H, J(<sup>1</sup>H-<sup>13</sup>C) = 127 Hz, CH<sub>3</sub> (C5)), 0.28 (s, 9H, <sup>2</sup>J(<sup>1</sup>H-<sup>29</sup>Si) = 6.6 Hz, J(<sup>1</sup>H-<sup>13</sup>C) = 120 Hz, (SiMe<sub>3</sub>)-C3), 0.05 (s, 9H, <sup>2</sup>J(<sup>1</sup>H-<sup>29</sup>Si) = 7.0 Hz, J(<sup>1</sup>H-<sup>13</sup>C) = 120 Hz, (SiMe<sub>3</sub>)-C1). **<sup>13</sup>C NMR** (25 °C, [D<sub>6</sub>]benzene, 100.61 MHz): δ = 161.6 (C4), 144.8 (*i*-Ph), 128.3, 127.8, 127.7 (3 signals under solvent signal, Ph), 122.0 (C3), 108.2 (C2), 101.7 (C1), 26.8 (CH<sub>3</sub>, (C5)), 0.5 ((SiMe<sub>3</sub>)-C3), 0.2 ((SiMe<sub>3</sub>)-C1). **<sup>29</sup>Si-inept NMR** (25 °C, [D<sub>6</sub>]benzene, 59.63 MHz): δ = -6.0 (dec, Si(CH<sub>3</sub>)<sub>3</sub>, <sup>2</sup>J(<sup>1</sup>H-<sup>29</sup>Si) = 6.6 Hz), -19.4 (dec, Si(CH<sub>3</sub>)<sub>3</sub>, <sup>2</sup>J(<sup>1</sup>H-<sup>29</sup>Si) = 7.0 Hz). **RAMAN** (473 nm, 20 sec, 20 scans): 3061 (m), 2959 (m), 2848 (s), 2848 (w), 2201 (w), 2112 (s), 1600 (s), 1559 (s), 1467 (w), 1286 (w), 1137 (w), 1064 (w), 998 (m), 844 (w), 759 (w), 689 (w), 633 (m), 597 (w), 563 (w), 404 cm<sup>-1</sup> (w).

**5E: <sup>1</sup>H NMR** (25 °C, [D<sub>6</sub>]benzene, 400.13 MHz): δ = 7.52 (m, 2H, Ph), 7.21 (m, 2H, Ph), 7.09 (m, 1H, Ph), 2.03 (s, 3H, J(<sup>1</sup>H-<sup>13</sup>C) = 127 Hz, CH<sub>3</sub> (C5)), 0.34 (s, 9H, <sup>2</sup>J(<sup>1</sup>H-<sup>29</sup>Si) = 6.8 Hz, J(<sup>1</sup>H-<sup>13</sup>C) = 119 Hz, (SiMe<sub>3</sub>)-C3), 0.11 (s, 9H, <sup>2</sup>J(<sup>1</sup>H-<sup>29</sup>Si) = 7.0 Hz, J(<sup>1</sup>H-<sup>13</sup>C) = 120 Hz, (SiMe<sub>3</sub>)-C1). **<sup>13</sup>C NMR** (25 °C,

[D<sub>6</sub>]benzene, 100.61 MHz):  $\delta$  = 159.4 (C4), 144.5 (*i*-Ph), 128.1, 127.8, 127.8 (3 signals under solvent signal, Ph), 120.2 (C3), 108.8 (C2), 99.5 (C1), 23.9 (CH<sub>3</sub>, (C5)), 0.3 ((SiMe<sub>3</sub>)-C3), 0.1 ((SiMe<sub>3</sub>)-C1). **<sup>29</sup>Si-inept NMR** (25 °C, [D<sub>6</sub>]benzene, 59.63 MHz):  $\delta$  = -6.7 (dec, Si(CH<sub>3</sub>)<sub>3</sub>, <sup>2</sup>*J*(<sup>1</sup>H-<sup>29</sup>Si) = 6.8 Hz), -19.7 (dec, Si(CH<sub>3</sub>)<sub>3</sub>, <sup>2</sup>*J*(<sup>1</sup>H-<sup>29</sup>Si) = 7.0 Hz). **RAMAN** (473 nm, 10 sec, 20 scans): 3067 (w), 2960 (m), 2900 (s), 2187 (w), 2115 (s), 1599 (m), 1578 (m), 1552 (s), 1439 (w), 1374 (w), 1287 (w), 1266 (w), 1183 (w), 1125 (w), 1027 (w), 999 (s), 837 (w), 758 (w), 692 (w), 636 (m), 613 (w), 572 (w), 402 cm<sup>-1</sup> (w).

## 2.4. Reaction of 2 with benzaldehyde to *E/Z* isomere mixture of (4-phenylbut-3-en-1-yne-1,3-diyl)bis(trimethylsilane) (6*E* and 6*Z*)

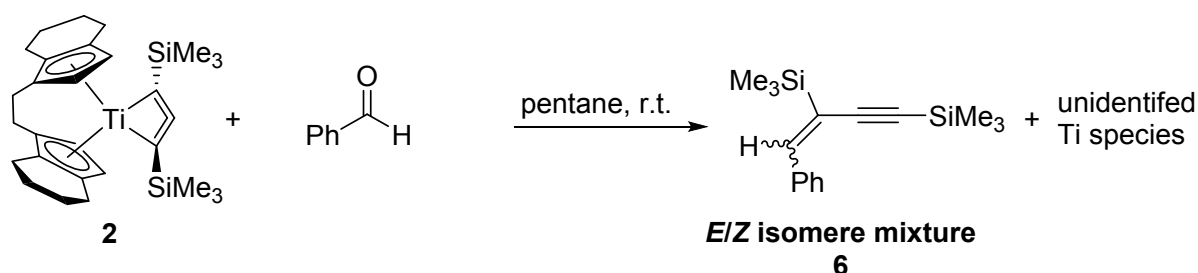

Compound **2** (0.20 mmol, 0.100 g) was dissolved in pentane (2 mL) and benzaldehyde (0.20 mmol, 22 mg) was added. After 16 hours of stirring at room temperature the solvent of the reaction mixture was removed in *vacuo*. Next, the orange residue was suspended in pentane (5 mL) and was filtered over Silica Gel. After removing the solvent, a mixture of *E/Z* isomers (**6**, *E/Z* ratio 0.8 : 1) was separated as colourless liquid. Yield: 27 mg, 50 %,.

**<sup>1</sup>H NMR** (25 °C, [D<sub>6</sub>]benzene, 400.13 MHz):  $\delta$  = 8.11 (m, 2H, Ph), 7.89 (s, 1H, *H*-C4[Z]), 7.22 (m, 2H, Ph), 7.04 (m, 6H, Ph), 6.88 (s, 1H, *H*-C4[E]), 0.28 (s, 9H, *J*(<sup>1</sup>H-<sup>13</sup>C) = 120 Hz, (SiMe<sub>3</sub>)-C1[Z]), 0.26 (s, 9H, *J*(<sup>1</sup>H-<sup>13</sup>C) = 120 Hz, (SiMe<sub>3</sub>)-C3[E]), 0.24 (s, 9H, *J*(<sup>1</sup>H-<sup>13</sup>C) = 120 Hz, (SiMe<sub>3</sub>)-C1[E]), 0.17 (s, 9H, *J*(<sup>1</sup>H-<sup>13</sup>C) = 120 Hz, (SiMe<sub>3</sub>)-C3[Z]). **<sup>13</sup>C NMR** (25 °C, [D<sub>6</sub>]benzene, 100.61 MHz):  $\delta$  = 152.9 (C4[Z]), 145.8 (C4[E]), 139.0 (*i*-Ph[Z]), 138.3 (*i*-Ph[E]), 129.4, 129.0, 128.7, 128.4, 128.2, 128.2 (2 x Ph), 127.6 (C3[Z]), 124.2 (C3[E]), 110.2 (C2[Z]), 107.2 (C1[E]), 106.9 (C2[E]), 97.1 (C1[Z]), 0.3 (SiMe<sub>3</sub>)-C1[Z]), 0.2 ((SiMe<sub>3</sub>)-C3[Z]), 0.1 (SiMe<sub>3</sub>)-C1[E]), -1.9 ((SiMe<sub>3</sub>)-C3[E]). **<sup>29</sup>Si-inept NMR** (25 °C, [D<sub>6</sub>]benzene, 59.63 MHz):  $\delta$  = -0.7 (dec, <sup>2</sup>*J*(<sup>1</sup>H-<sup>29</sup>Si) = 6.8 Hz, Si(CH<sub>3</sub>)<sub>3</sub>-C3[E]), -5.9 (m, Si(CH<sub>3</sub>)<sub>3</sub>-C3[Z]), -18.7 (m, Si(CH<sub>3</sub>)<sub>3</sub>), -19.1 (m, Si(CH<sub>3</sub>)<sub>3</sub>). **MS-EI<sup>+</sup>**: [M<sup>+</sup>] 272 (75), [M-Me<sup>+</sup>] 257 (79), [M-2Me<sup>+</sup>] 242 (17), [TMS] 73 (95). **IR** of **6** isomer mixture (32 scans, ATR): 3059 (w), 3026 (w), 2959 (w), 2897 (w), 2117 (m), 1584 (w), 1558 (w), 1491 (w), 1446 (w), 1407 (w), 1248 (m), 1111 (w), 1062 (w), 1028 (w), 922 (w), 858 (m), 832 (s), 752 (m), 689 (m), 634 (w), 602 (w), 589 (w), 567 (w), 524 cm<sup>-1</sup> (w). **Raman** of **6** isomer mixture (784 nm, 15 sec, 15 acc): 3059 (w), 2964 (w), 2899 (w), 2118 (m), 1600 (m), 1587 (w), 1558 (m), 1446 (w), 1362 (w), 1206 (w), 1186 (w), 1156 (w), 1111 (w), 1028 (w), 1000 (s), 922 (w), 882 (w), 842 (w), 757 (w), 695 (w), 634 (w), 589 (w), 567 (w), 486 cm<sup>-1</sup> (w).

## 2.5. Reaction of **2** with acetone at low temperature to characterise the intermediate structure **7**

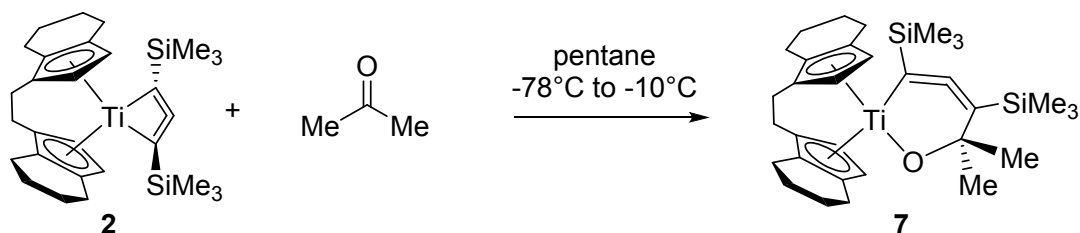

Compound **2** (0.20 mmol, 0.100 g) was dissolved in pentane (8 mL) at ambient temperature and then cooled to  $-78\text{ }^{\circ}\text{C}$ . To this solution, neat acetone (0.2 mmol, 0.012 g) was added at this temperature. The temperature was slowly raised to  $-15\text{ }^{\circ}\text{C}$ , where a colour gradient from red to petrol was obtained within 4 hours. This turbid reaction mixture was dried *in vacuo* at  $-20\text{ }^{\circ}\text{C}$  for 4 h, the residue was extracted/filtered with pentane (2 mL) at  $-20\text{ }^{\circ}\text{C}$ . This filtrate was concentrated to approximately 1 mL and was slowly cooled to  $-78\text{ }^{\circ}\text{C}$ . The resulting dark petrol coloured residue was identified as **7** by low temperature NMR and IR spectroscopy. This complex is only stable at temperatures below  $-10\text{ }^{\circ}\text{C}$ .

**$^1\text{H}$  NMR** ( $-10\text{ }^{\circ}\text{C}$ ,  $[\text{D}_8]$ toluene, 400.13 MHz):  $\delta$  = 6.83 (d, 1H,  $^1J(^1\text{H}-^{13}\text{C}) = 170\text{ Hz}$ ,  $^3J(^1\text{H}-^1\text{H}) = 3.0\text{ Hz}$ , C-H ebthi), 6.73 (d, 1H,  $^1J(^1\text{H}-^{13}\text{C}) = 170\text{ Hz}$ ,  $^3J(^1\text{H}-^1\text{H}) = 2.6\text{ Hz}$ , C-H ebthi), 5.13 (d, 1H,  $^1J(^1\text{H}-^{13}\text{C}) = 170\text{ Hz}$ ,  $^3J(^1\text{H}-^1\text{H}) = 3.0\text{ Hz}$ , C-H ebthi), 4.90 (d, 1H,  $^1J(^1\text{H}-^{13}\text{C}) = 170\text{ Hz}$ ,  $^3J(^1\text{H}-^1\text{H}) = 2.6\text{ Hz}$ , C-H ebthi), 3.04 (m, 1H,  $\text{CH}_2$  ebthi), 2.83 (m, 1H,  $\text{CH}_2$  ebthi), 2.40 (m, 10H, 5 x  $\text{CH}_2$  ebthi), 1.67 (m, 8H, 4 x  $\text{CH}_2$  ebthi), 1.44 (br. s, 6H,  $J(^1\text{H}-^{13}\text{C}) = 125\text{ Hz}$ ,  $\text{CH}_3$ ), 0.40 (s, 9H,  $^2J(^1\text{H}-^{29}\text{Si}) = 6.5\text{ Hz}$ ,  $J(^1\text{H}-^{13}\text{C}) = 119\text{ Hz}$ , (C1-SiMe<sub>3</sub>)), 0.32 (s, 9H,  $^2J(^1\text{H}-^{29}\text{Si}) = 6.5\text{ Hz}$ ,  $J(^1\text{H}-^{13}\text{C}) = 119\text{ Hz}$ , (C3-SiMe<sub>3</sub>)).  **$^{13}\text{C}$  NMR** ( $-10\text{ }^{\circ}\text{C}$ ,  $[\text{D}_8]$ toluene, 100.61 MHz):  $\delta$  = 179.7 (C2), 151.9 (C1), 139.1, 131.7, 131.3, 129.4, 123.0, 119.5 (6 x C ebthi), 109.6, 107.7, 105.1, 104.7 (4 x C-H ebthi), 109.4 (C3), 90.3 (C4), 38.9, 31.7 (2 x C4-Me), 29.3, 28.6, 26.0, 25.9, 25.1, 25.0, 24.0, 23.6, 23.3, 23.0 (10 x  $\text{CH}_2$  ebthi), 3.1 (C1-SiMe<sub>3</sub>), 2.0 (C3-SiMe<sub>3</sub>).  **$^{29}\text{Si}$ -inept NMR** ( $-10\text{ }^{\circ}\text{C}$ ,  $[\text{D}_8]$ toluene, 59.63 MHz):  $\delta$  = -7.17 (dec, Si(CH<sub>3</sub>)<sub>3</sub>,  $^2J(^1\text{H}-^{29}\text{Si}) = 6.4\text{ Hz}$ ), -12.6 (dec, Si(CH<sub>3</sub>)<sub>3</sub>,  $^2J(^1\text{H}-^{29}\text{Si}) = 6.4\text{ Hz}$ ). **IR** (32 scans): 2955 (m), 2924 (m), 2855 (w), 1805 (m), 1446 (w), 1244 (m), 1177 (w), 932 (m), 828 (s), 781 (s), 559 (m).

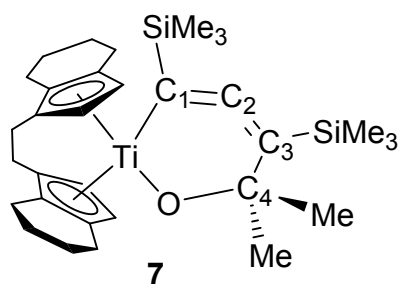

Scheme S1: NMR Assignment Scheme of **7**.



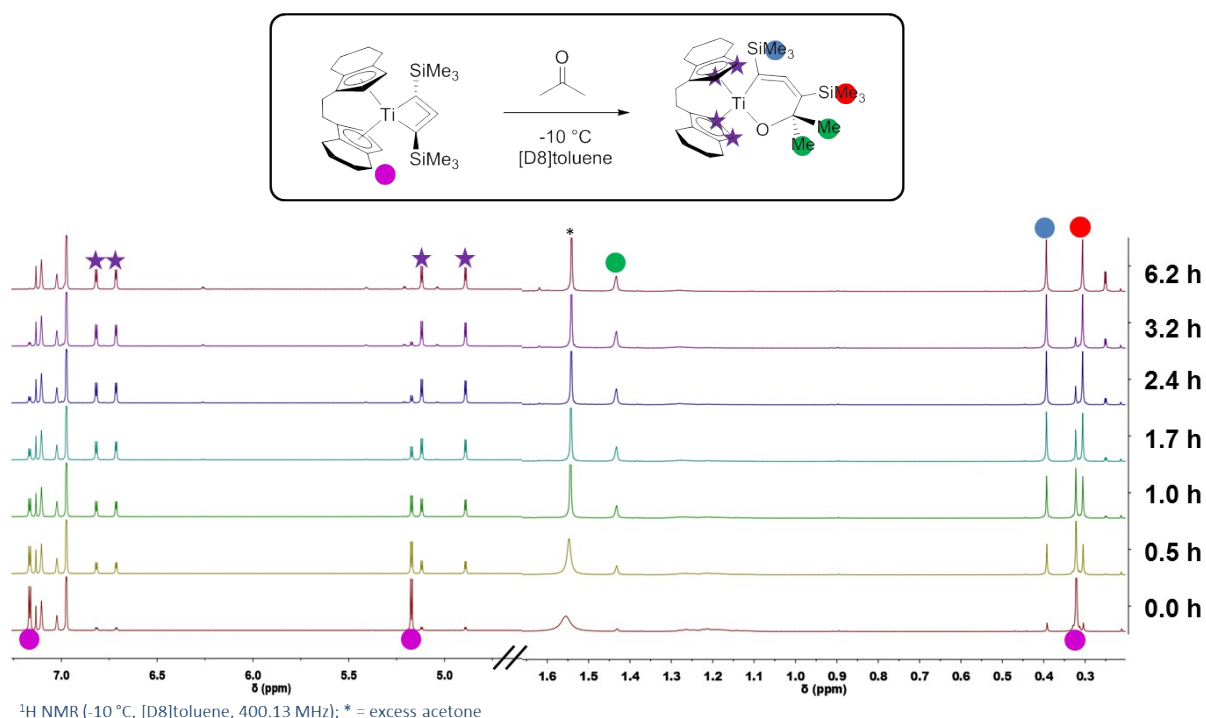

**Figure S2:** Low-temperature reaction monitoring of the formation of **7** at -10 °C in [D<sub>8</sub>]toluene (c.f. Figure S20, Figure S21).

## 2.6. Reaction of **2** with benzaldehyde at low temperature to characterise the proposed intermediate structure **8**.

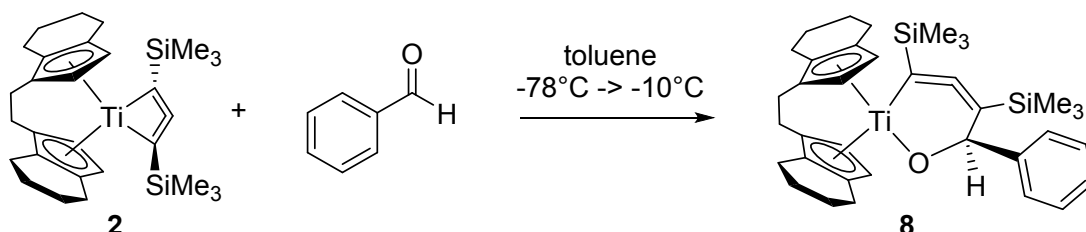

Compound **2** (0.05 mmol, 0.025 g) was dissolved in [D<sub>8</sub>]toluene (0.7 mL) at ambient temperature and then cooled to -78 °C. To this solution, neat benzaldehyde (0.05 mmol, 0.005 g) was added at this temperature. The sample was brought to -10 °C in the probe of the NMR spectrometer and the reaction sequence was monitored at that temperature for 6 hours while recording a series of NMR spectra. The conversion proved slow enough to characterise the intermediate **8**.

<sup>1</sup>H NMR (-10 °C, [D<sub>8</sub>]toluene, 400.13 MHz): δ = 6.78 (d, 1H, <sup>3</sup>J(<sup>1</sup>H-<sup>1</sup>H) = 2.7 Hz, C-H ebthi), 6.10 (s, 1H C4-H), 5.25 (d, 1H, <sup>3</sup>J(<sup>1</sup>H-<sup>1</sup>H) = 3.2 Hz, C-H ebthi), 4.82 (d, 1H, <sup>3</sup>J(<sup>1</sup>H-<sup>1</sup>H) = 2.7 Hz, C-H ebthi), 3.55 (m, 4H, CH<sub>2</sub> ebthi), 0.46 (s, 9, J(<sup>1</sup>H-<sup>13</sup>C) = 119 Hz, (C1-SiMe<sub>3</sub>)), 0.09 (s, 9H, <sup>2</sup>J(<sup>1</sup>H-<sup>29</sup>Si) = 6.6 Hz, J(<sup>1</sup>H-<sup>13</sup>C) = 118 Hz, (C3-SiMe<sub>3</sub>)). <sup>13</sup>C NMR (-10 °C, [D<sub>8</sub>]toluene, 100.61 MHz): δ = 179.5 (C2), 154.2 (C1), 149.98 (*ipso*-C<sub>Ph</sub>), 137.8, 130.9, 128.9, 124.2, 120.2, (5 x Ph) 111.1, 104.3, 103.5, 104.7 (4 x C-H ebthi), 109.1 (C3), 91.8 (C4), 2.51 (C1-SiMe<sub>3</sub>), -0.2 (C3-SiMe<sub>3</sub>). <sup>29</sup>Si-inept NMR (-10 °C, [D<sub>8</sub>]toluene, 59.63 MHz): δ = -6.58 (m, C1-Si(CH<sub>3</sub>)<sub>3</sub>), -10.3 (m, C3-Si(CH<sub>3</sub>)<sub>3</sub>). (A more precise assignment was not made, since the signals in the reaction mixture cannot be assigned without any doubt.)

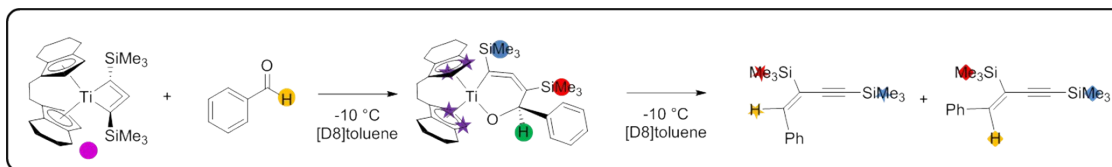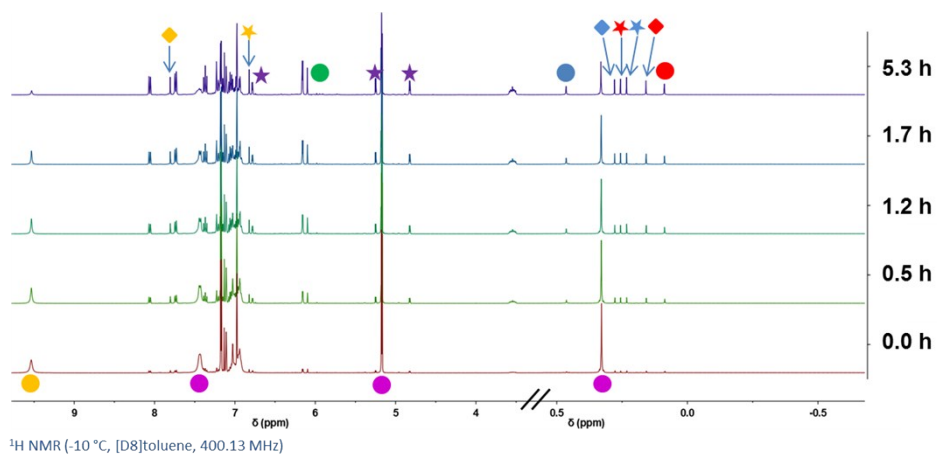

**Figure S3:** Low-temperature reaction monitoring of the formation of **8** at  $-10^\circ\text{C}$  in  $[\text{D}_8]\text{toluene}$ .

### 3. Proof of Stability of Compound 2

#### 3.1. Decomposition of 2 in air and water

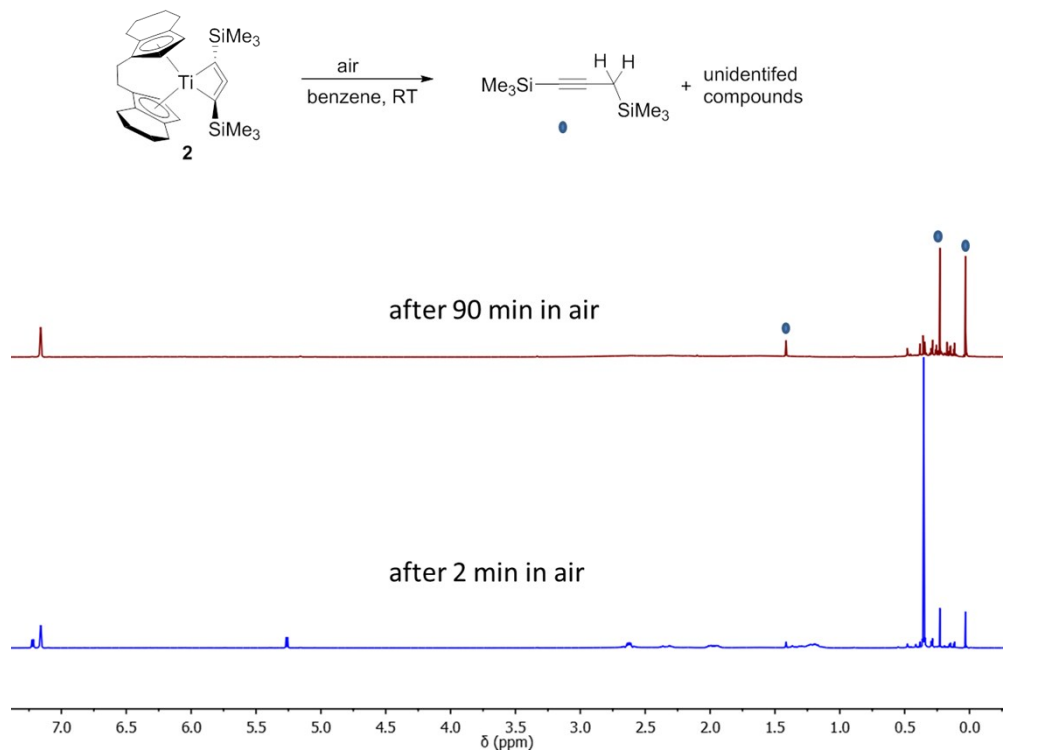

Figure S4:  $^1\text{H}$  NMR spectrum of 2 in  $[\text{D}_6]$ benzene after exposure to air for 2 min and 90 min.

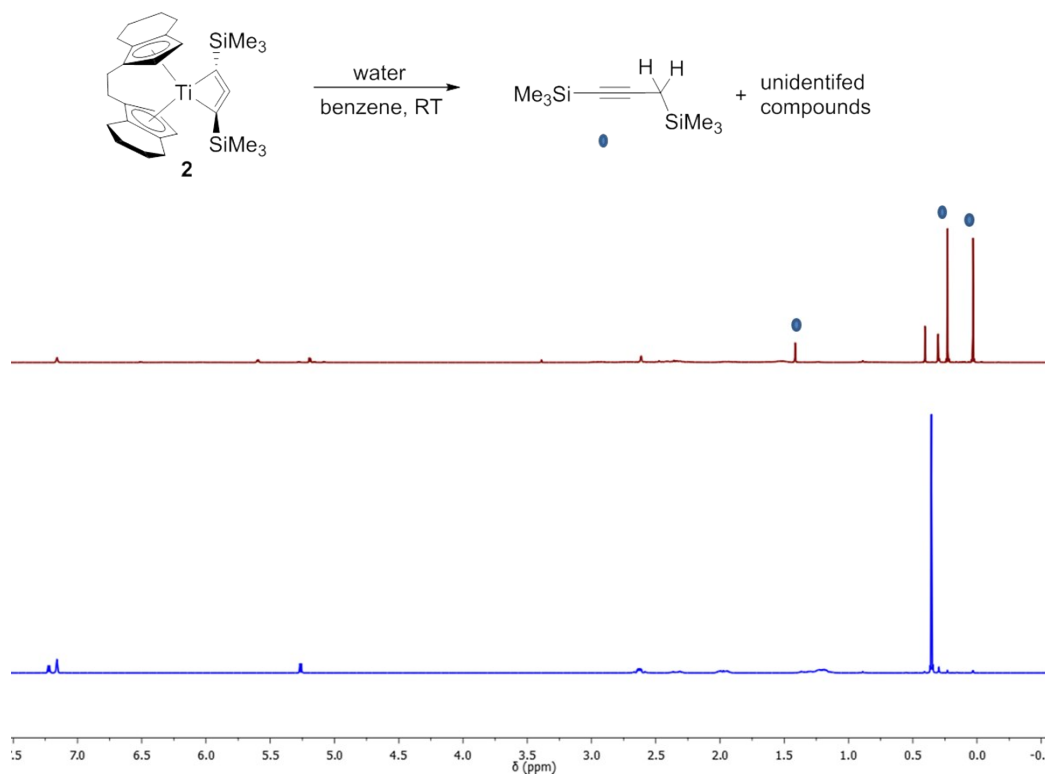

Figure S5:  $^1\text{H}$  NMR spectrum 2 in  $[\text{D}_6]$ benzene after exposure to water.

## 4. Crystallographic Details

**Table S1:** Crystallographic details of **2** and **3**.

|                                          | <b>2</b>                                           | <b>3</b>                                        |
|------------------------------------------|----------------------------------------------------|-------------------------------------------------|
| Chem. Formula                            | C <sub>29</sub> H <sub>42</sub> Si <sub>2</sub> Ti | C <sub>22</sub> H <sub>28</sub> Si <sub>2</sub> |
| Form. Wght [g mol <sup>-1</sup> ]        | 494.70                                             | 348.62                                          |
| Colour                                   | red                                                | colourless                                      |
| Cryst. system                            | monoclinic                                         | monoclinic                                      |
| Space group                              | <i>P2<sub>1</sub>/n</i>                            | <i>P2<sub>1</sub>/n</i>                         |
| a [Å]                                    | 14.2569(6)                                         | 11.485(2)                                       |
| b [Å]                                    | 10.8620(4)                                         | 9.6273(19)                                      |
| c [Å]                                    | 18.2070(7)                                         | 19.737(4)                                       |
| α [°]                                    | 90                                                 | 90                                              |
| β [°]                                    | 98.8260(8)                                         | 101.59(3)                                       |
| γ [°]                                    | 90                                                 | 90                                              |
| V [Å <sup>3</sup> ]                      | 2786.12(19)                                        | 2137.7(8)                                       |
| Z                                        | 4                                                  | 4                                               |
| ρ <sub>calc.</sub> [g cm <sup>-3</sup> ] | 1.179                                              | 1.083                                           |
| μ [mm <sup>-1</sup> ]                    | 0.408                                              | 0.167                                           |
| T [K]                                    | 150(2)                                             | 150(2)                                          |
| radiation type                           | MoKα                                               | MoKα                                            |
| reflections measured                     | 25163                                              | 36201                                           |
| independent reflections                  | 6735                                               | 5154                                            |
| observed reflections with I > 2σ(I)      | 5551                                               | 3064                                            |
| R <sub>int.</sub>                        | 0.0286                                             | 0.0688                                          |
| F(000)                                   | 1064                                               | 752                                             |
| R <sub>1</sub> (I > 2σ(I))               | 0.0340                                             | 0.0338                                          |
| wR <sub>2</sub> (all data)               | 0.0934                                             | 0.0852                                          |
| GOF on F <sup>2</sup>                    | 1.013                                              | 0.814                                           |
| Parameters                               | 314                                                | 223                                             |
| CCDC number                              | 1897219                                            | 1897220                                         |

## 4.1. Compound 2

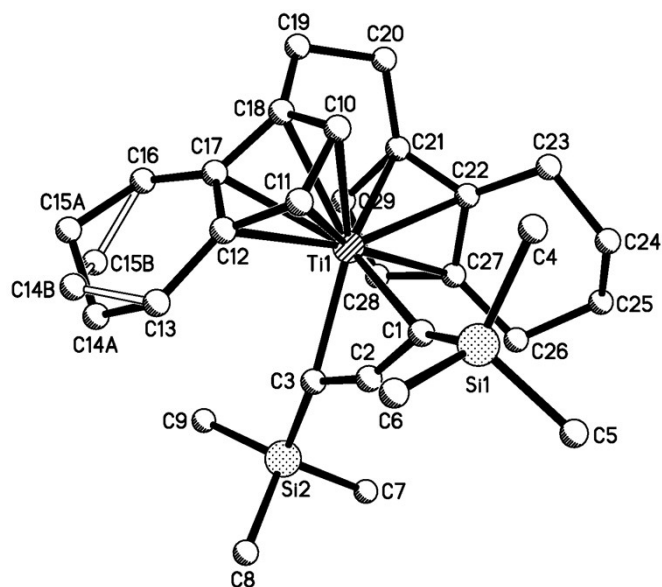

**Figure S6:** Numbering scheme of **2**. H atoms are omitted for clarity.

**Table S2:** Selected bond lengths (Å), angles and torsion angles (°) of **2**.

|               |            |                   |            |
|---------------|------------|-------------------|------------|
| <b>Ti1–C1</b> | 2.2287(14) | <b>C2–C1–Si1</b>  | 136.71(12) |
| <b>Ti1–C2</b> | 2.1781(14) | <b>C2–C1–Ti1</b>  | 70.69(9)   |
| <b>Ti1–C3</b> | 2.2349(15) | <b>Si1–C1–Ti1</b> | 145.29(8)  |
| <b>C1–C2</b>  | 1.303(2)   | <b>C1–C2–C3</b>   | 150.08(15) |
| <b>C2–C3</b>  | 1.308(2)   | <b>C2–C3–Ti1</b>  | 70.39(9)   |
| <b>C1–Si1</b> | 1.8370(15) | <b>C2–C3–Si2</b>  | 134.80(13) |
| <b>C3–Si2</b> | 1.8326(16) | <b>Si2–C3–Ti1</b> | 148.47(8)  |
|               |            | <b>C1–Ti1–C3</b>  | 68.83(6)   |

## 4.2. Compound 3

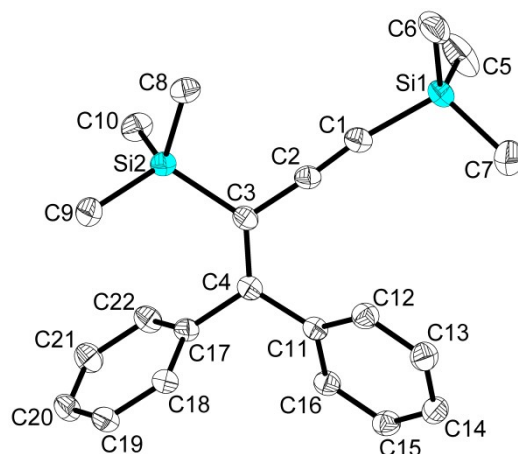

**Figure S7:** Molecular structure of compound **3**. Thermal ellipsoids correspond to 30% probability. Hydrogen atoms are omitted for clarity.

**Table S3:** Selected bond lengths (Å), angles and torsion angles (°) of **3**.

|                     |             |                   |            |
|---------------------|-------------|-------------------|------------|
| <b>C1–Si1</b>       | 1.8276(16)  | <b>C2–C1–Si1</b>  | 172.62(13) |
| <b>C1–C2</b>        | 1.2080(19)  | <b>C1–C2–C3</b>   | 176.07(15) |
| <b>C2–C3</b>        | 1.4364(19)  | <b>C2–C3–Si2</b>  | 113.09(9)  |
| <b>C3–Si2</b>       | 1.9002(15)  | <b>C4–C3–Si2</b>  | 127.25(11) |
| <b>C3–C4</b>        | 1.3595(18)  | <b>C4–C3–C2</b>   | 119.63(13) |
| <b>C4–C11</b>       | 1.485(2)    | <b>C11–C4–C17</b> | 114.94(11) |
| <b>C4–C17</b>       | 1.4881(19)  | <b>C3–C4–C11</b>  | 124.65(12) |
| <b>C2–C3–C4–C11</b> | 7.7(2)      | <b>C3–C4–C17</b>  | 120.42(12) |
| <b>C2–C3–C4–C17</b> | -172.18(12) |                   |            |

### 4.3. Comparison of structural features of **2** with known metallacyclobutadienes

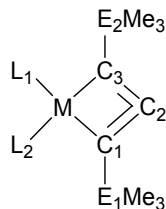

**Table S4:** Comparison of known structural parameters from known complexes and **2**.

| Compound                                                                                                                                                             | M-C <sub>1</sub> | M-C <sub>2</sub> | M-C <sub>3</sub> | C <sub>1</sub> -C <sub>2</sub> | C <sub>2</sub> -C <sub>3</sub> | C <sub>1</sub> -E <sub>1</sub> | C <sub>3</sub> -E <sub>2</sub> | C <sub>1</sub> -M-C <sub>3</sub> | C <sub>1</sub> -C <sub>2</sub> -C <sub>3</sub> | ∠Σ(C <sub>1</sub> ) | ∠Σ(C <sub>3</sub> ) |
|----------------------------------------------------------------------------------------------------------------------------------------------------------------------|------------------|------------------|------------------|--------------------------------|--------------------------------|--------------------------------|--------------------------------|----------------------------------|------------------------------------------------|---------------------|---------------------|
| <i>rac</i> -( <i>ebthi</i> )Ti(Me <sub>3</sub> SiC <sub>3</sub> SiMe <sub>3</sub> )<br>M = Ti, E = Si                                                                | 2.2287(14)       | 2.1781(14)       | 2.2349(15)       | 1.303(2)                       | 1.308(2)                       | 1.8370(15)                     | 1.8326(16)                     | 68.83(6)                         | 150.08(15)                                     | 352.69              | 353.66              |
| Cp(Cl)W(Me <sub>3</sub> CC <sub>3</sub> CMe <sub>3</sub> ) ( <b>B</b> ) <sup>7</sup><br>M = W, E = C                                                                 | 1.929(4)         | 2.049(2)         | 1.919(2)         | 1.311(1)                       | 1.399(2)                       | 1.565(2)                       | 1.501(2)                       | 79.4                             | 130.2                                          | 359.79              | 358.36              |
| (Py) <sub>2</sub> (OC(CF <sub>3</sub> ) <sub>2</sub> ) <sub>2</sub> Mo(Me <sub>3</sub> CC <sub>3</sub> CMe <sub>3</sub> ) ( <b>A</b> ) <sup>8</sup><br>M = Mo, E = C | 1.943(3)         | 2.005(4)         | 1.943(3)         | 1.379(4)                       | 1.379(4)                       | 1.519(4)                       | 1.519(4)                       | 81.7                             | 134.4                                          | 359.98              | 359.98              |
| (Ph <sub>3</sub> SiO) <sub>2</sub> (phen)Mo(RC <sub>3</sub> R) ( <b>C</b> ) <sup>9</sup><br>M = Mo, R = <i>p</i> -MeOC <sub>6</sub> H <sub>4</sub>                   | 1.961(5)         | 2.030(5)         | 1.979(4)         | 1.371(7)                       | 1.374(6)                       | 1.456(6)                       | 1.457(6)                       | 80.20(19)                        | 135.2(4)                                       | 359.9               | 358.99              |

**Table S5:** Bond analysis (J. March) with the literature values and structural parameters of **2.[a]**

| Compound                                                                                                                                                               | C <sub>1</sub> -C <sub>2</sub>                                            | C <sub>2</sub> -C <sub>3</sub>                                          | C <sub>1</sub> -E <sub>1</sub>                                             | C <sub>3</sub> -E <sub>2</sub>                                             |
|------------------------------------------------------------------------------------------------------------------------------------------------------------------------|---------------------------------------------------------------------------|-------------------------------------------------------------------------|----------------------------------------------------------------------------|----------------------------------------------------------------------------|
| <i>rac</i> -( <i>ebthi</i> )Ti(Me <sub>3</sub> SiC <sub>3</sub> SiMe <sub>3</sub> )<br>M = Ti, E = Si                                                                  | C <sub>sp2</sub> = C <sub>sp</sub><br>C <sub>sp</sub> = C <sub>sp</sub>   | C <sub>sp2</sub> = C <sub>sp</sub><br>C <sub>sp</sub> = C <sub>sp</sub> | -                                                                          | -                                                                          |
| Cp(Cl)W(Me <sub>3</sub> CC <sub>3</sub> CMe <sub>3</sub> ) ( <b>B</b> ) <sup>[7]</sup><br>M = W, E = C                                                                 | C <sub>sp2</sub> = C <sub>sp2</sub><br>C <sub>sp2</sub> = C <sub>sp</sub> | C <sub>sp</sub> - C <sub>sp</sub><br>C <sub>sp2</sub> - C <sub>sp</sub> | C <sub>sp3</sub> - C <sub>sp3</sub><br>C <sub>sp3</sub> - C <sub>sp2</sub> | C <sub>sp3</sub> - C <sub>sp3</sub>                                        |
| (Py) <sub>2</sub> (OC(CF <sub>3</sub> ) <sub>2</sub> ) <sub>2</sub> Mo(Me <sub>3</sub> CC <sub>3</sub> CMe <sub>3</sub> ) ( <b>A</b> ) <sup>[8]</sup><br>M = Mo, E = C | C <sub>sp</sub> - C <sub>sp</sub><br>C <sub>sp2</sub> - C <sub>sp</sub>   | C <sub>sp</sub> - C <sub>sp</sub><br>C <sub>sp2</sub> - C <sub>sp</sub> | C <sub>sp3</sub> - C <sub>sp3</sub><br>C <sub>sp3</sub> - C <sub>sp2</sub> | C <sub>sp3</sub> - C <sub>sp3</sub><br>C <sub>sp3</sub> - C <sub>sp2</sub> |
| (Ph <sub>3</sub> SiO) <sub>2</sub> (phen)Mo(RC <sub>3</sub> R) ( <b>C</b> ) <sup>[9]</sup><br>M = Mo, R = <i>p</i> -MeOC <sub>6</sub> H <sub>4</sub>                   | C <sub>sp</sub> - C <sub>sp</sub><br>C <sub>sp2</sub> - C <sub>sp</sub>   | C <sub>sp</sub> - C <sub>sp</sub><br>C <sub>sp2</sub> - C <sub>sp</sub> | C <sub>sp3</sub> - C <sub>sp2</sub><br>C <sub>sp2</sub> - C <sub>sp</sub>  | C <sub>sp3</sub> - C <sub>sp2</sub><br>C <sub>sp2</sub> - C <sub>sp</sub>  |

[a] = two best fitting descriptions are presented: Values taken from literature<sup>[10]</sup> (C<sub>sp3</sub> - C<sub>sp3</sub> 1.54; C<sub>sp3</sub> - C<sub>sp2</sub> 1.50; C<sub>sp2</sub> - C<sub>sp</sub> 1.42; C<sub>sp</sub> - C<sub>sp</sub> 1.38; C<sub>sp2</sub> = C<sub>sp2</sub> 1.34; C<sub>sp2</sub> = C<sub>sp</sub> 1.31; C<sub>sp</sub> = C<sub>sp</sub> 1.28



**Table S 6:** Bond analysis with respect to the reported literature values (P. Pyykkö ).[a]

| Compound                                                                                                                                                               | C <sub>1</sub> -C <sub>2</sub> | C <sub>2</sub> -C <sub>3</sub> | C <sub>1</sub> -E <sub>1</sub> | C <sub>3</sub> -E <sub>2</sub> |
|------------------------------------------------------------------------------------------------------------------------------------------------------------------------|--------------------------------|--------------------------------|--------------------------------|--------------------------------|
| rac(EBTHI)Ti(Me <sub>3</sub> SiC <sub>3</sub> SiMe <sub>3</sub> )<br>M = Ti, E = Si                                                                                    | C=C<br>C≡C                     | C=C<br>C≡C                     | C-Si<br>C=Si                   | C-Si<br>C=Si                   |
| Cp(Cl)W(Me <sub>3</sub> CC <sub>3</sub> CMe <sub>3</sub> ) ( <b>B</b> ) <sup>[7]</sup><br>M = W, E = C                                                                 | C=C<br>C≡C                     | C-C<br>C=C                     | C-C                            | C-C                            |
| (Py) <sub>2</sub> (OC(CF <sub>3</sub> ) <sub>2</sub> ) <sub>2</sub> Mo(Me <sub>3</sub> CC <sub>3</sub> CMe <sub>3</sub> ) ( <b>A</b> ) <sup>[8]</sup><br>M = Mo, E = C | C-C<br>C=C                     | C-C<br>C=C                     | C-C                            | C-C                            |
| (Ph <sub>3</sub> SiO) <sub>2</sub> (phen)Mo(RC <sub>3</sub> R) ( <b>C</b> ) <sup>[9]</sup><br>M = Mo, R = <i>p</i> -MeOC <sub>6</sub> H <sub>4</sub>                   | C-C<br>C=C                     | C-C<br>C=C                     | C-C<br>C=C                     | C-C<br>C=C                     |

[a] = two best fitting descriptions are presented: Values taken from literature<sup>[11]</sup> C-C = 1.50; C=C = 1.34; C≡C = 1.20; C-Si = 1.91; C=Si = 1.74.

## 5. Details of the NMR spectroscopy

### 5.1. $^1\text{H}$ and $^{13}\text{C}$ NMR spectra of **1**.

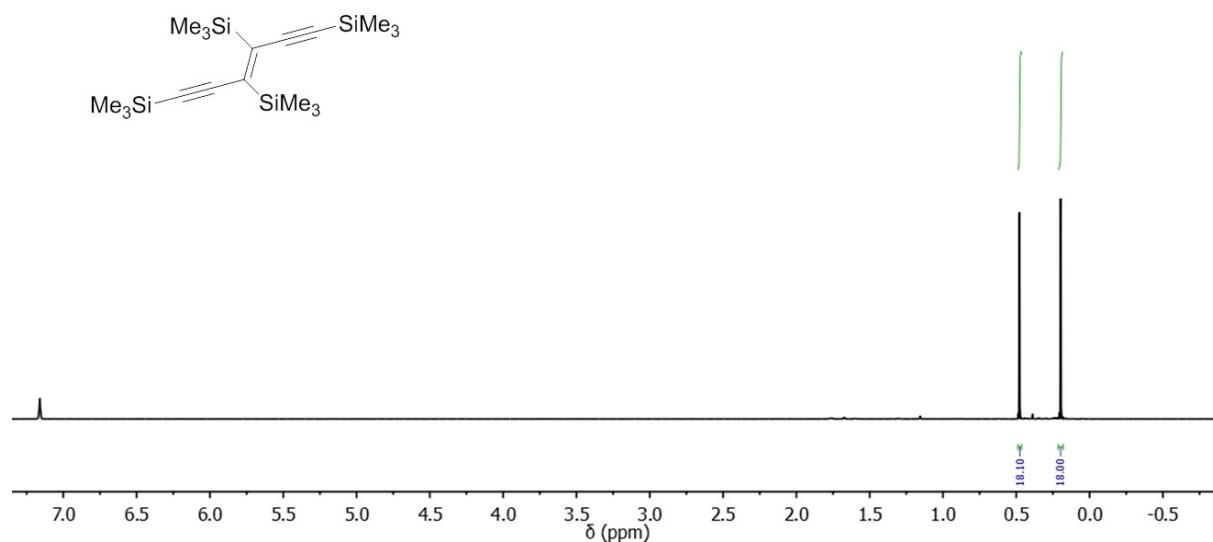

**Figure S8:**  $^1\text{H}$  NMR spectrum of **1** (25 °C,  $[\text{D}_6]\text{benzene}$ , 400.13 MHz).

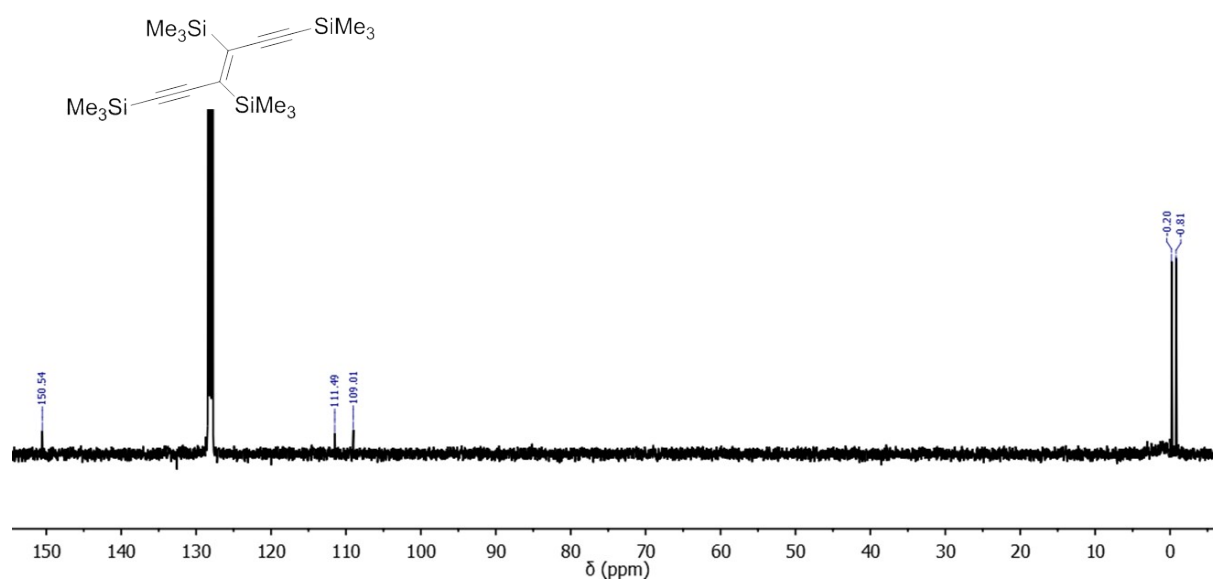

**Figure S9:**  $^{13}\text{C}\{^1\text{H}\}$  NMR spectrum of **1** (25 °C,  $[\text{D}_6]\text{benzene}$ , 100.61 MHz).

## 5.2. $^1\text{H}$ and $^{13}\text{C}$ NMR spectra of **2**

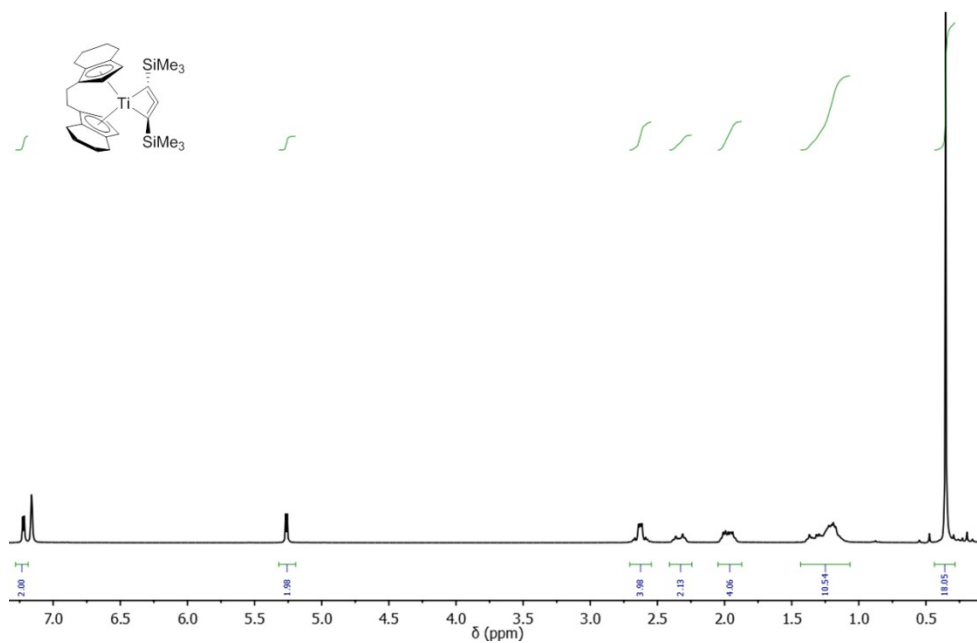

Figure S10:  $^1\text{H}$  NMR spectrum of **2** (25 °C,  $[\text{D}_6]\text{benzene}$ , 400.13 MHz).

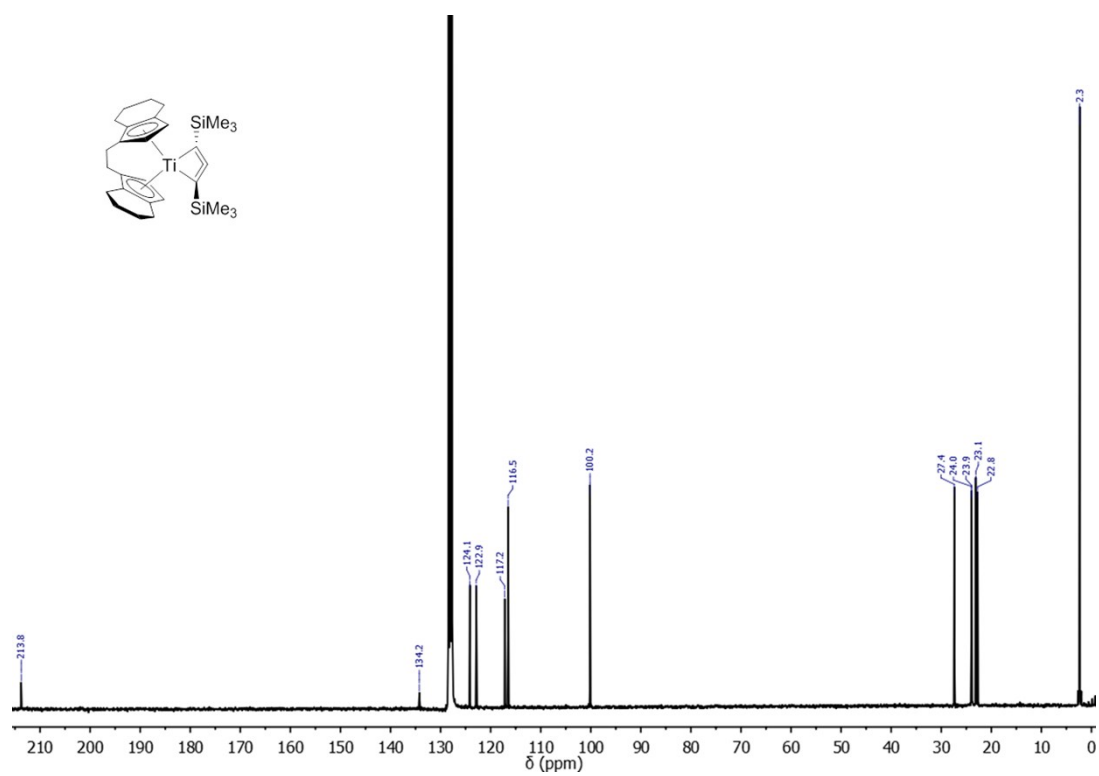

Figure S11:  $^{13}\text{C}\{^1\text{H}\}$  NMR spectrum of **2** (25 °C,  $[\text{D}_6]\text{benzene}$ , 100.61 MHz).

### 5.3. $^1\text{H}$ and $^{13}\text{C}$ NMR spectra of **3**

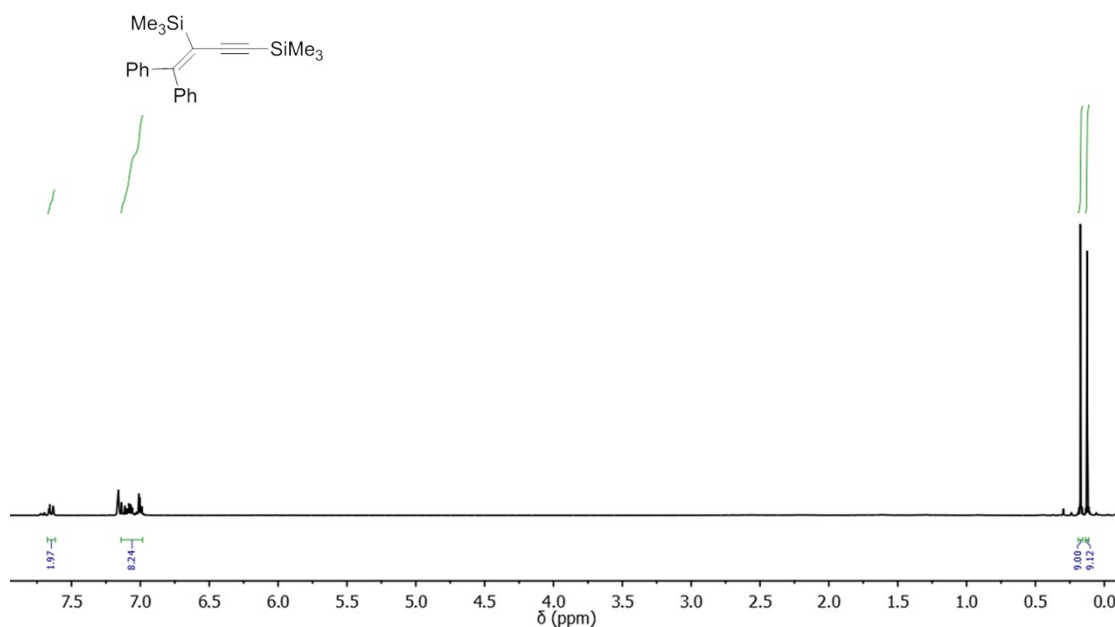

**Figure S12:**  $^1\text{H}$  NMR spectrum of **3** (25 °C,  $[\text{D}_6]\text{benzene}$ , 300.20 MHz).

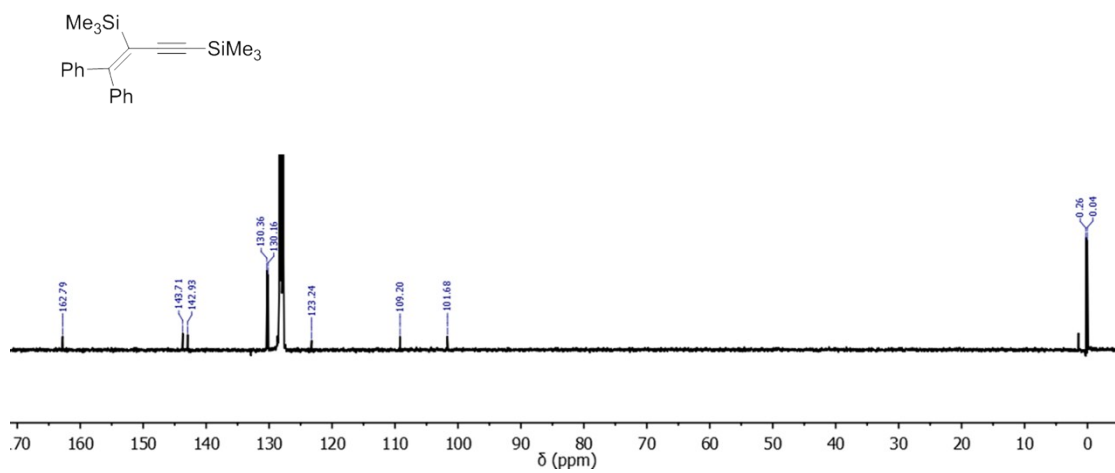

**Figure S13:**  $^{13}\text{C}\{^1\text{H}\}$  NMR spectrum of **3** (25 °C,  $[\text{D}_6]\text{benzene}$ , 100.61 MHz).

## 5.4. $^1\text{H}$ and $^{13}\text{C}$ NMR spectra of **4**

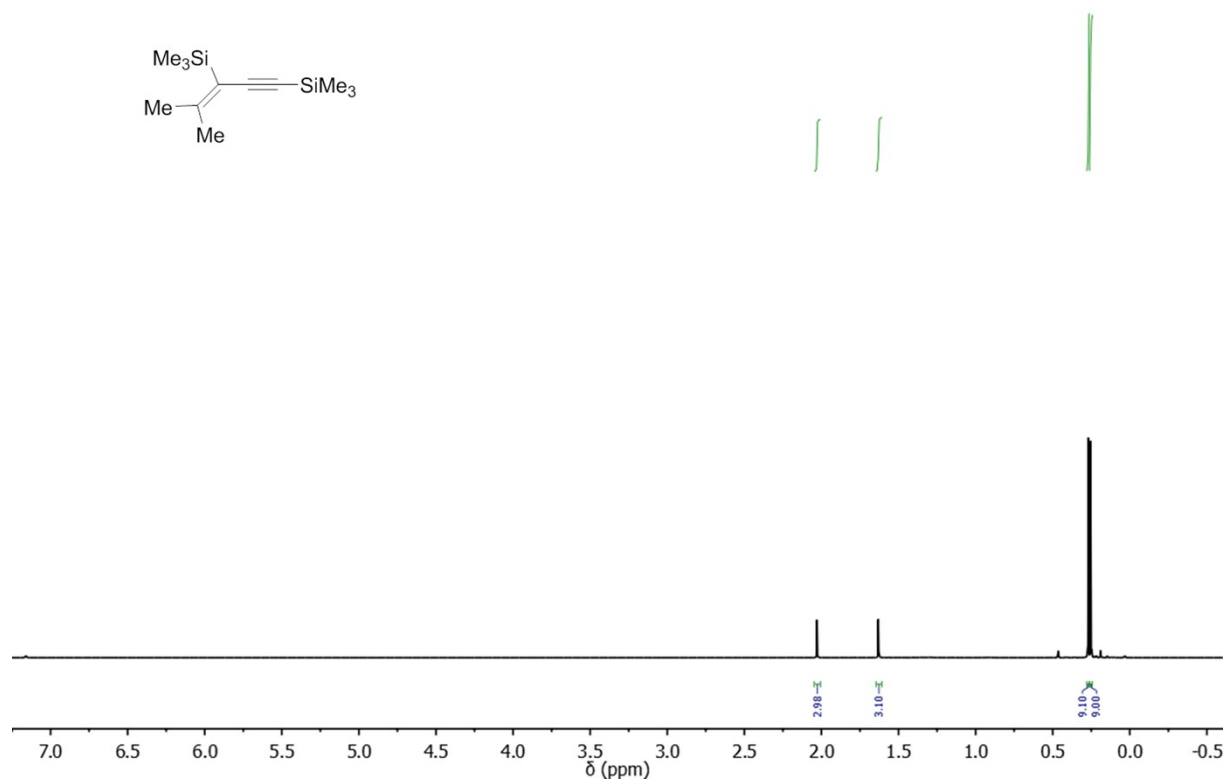

**Figure S14:**  $^1\text{H}$  NMR spectrum of **4** (25 °C,  $[\text{D}_6]\text{benzene}$ , 400.13 MHz).

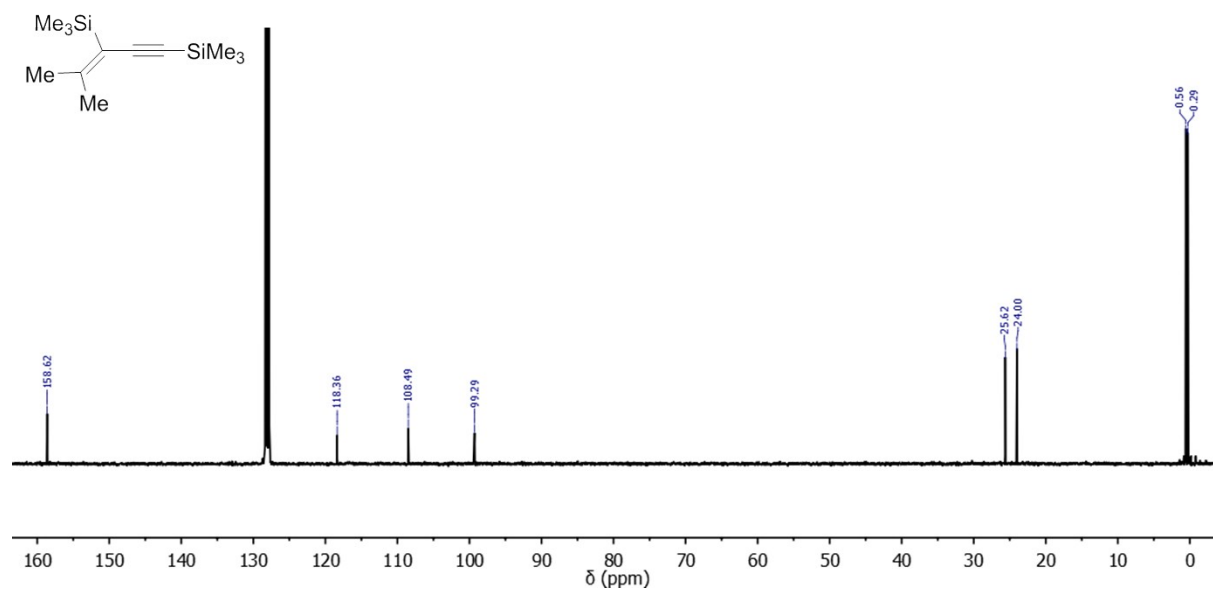

**Figure S15:**  $^{13}\text{C}\{^1\text{H}\}$  NMR spectrum of **4** (25 °C,  $[\text{D}_6]\text{benzene}$ , 100.61 MHz).

## 5.5. $^1\text{H}$ and $^{13}\text{C}$ NMR spectra of **5E** and **5Z**.

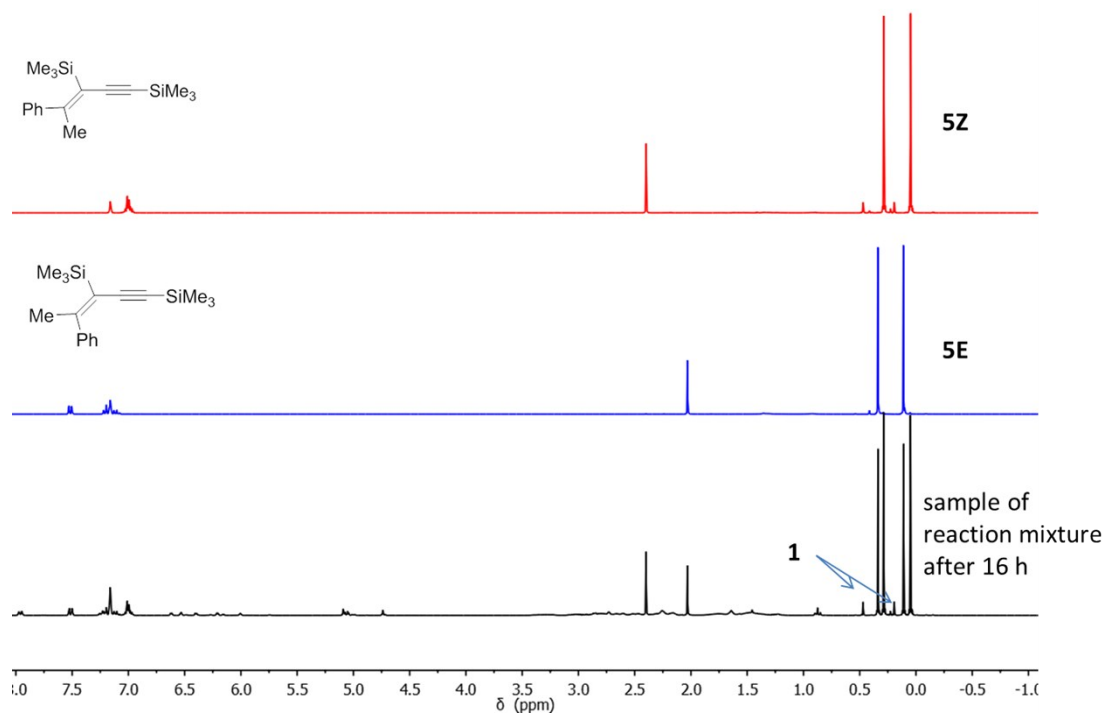

**Figure S16:**  $^1\text{H}$  NMR spectrum of **5E** and **5Z** (25 °C,  $[\text{D}_6]$ benzene, 400.13 MHz).

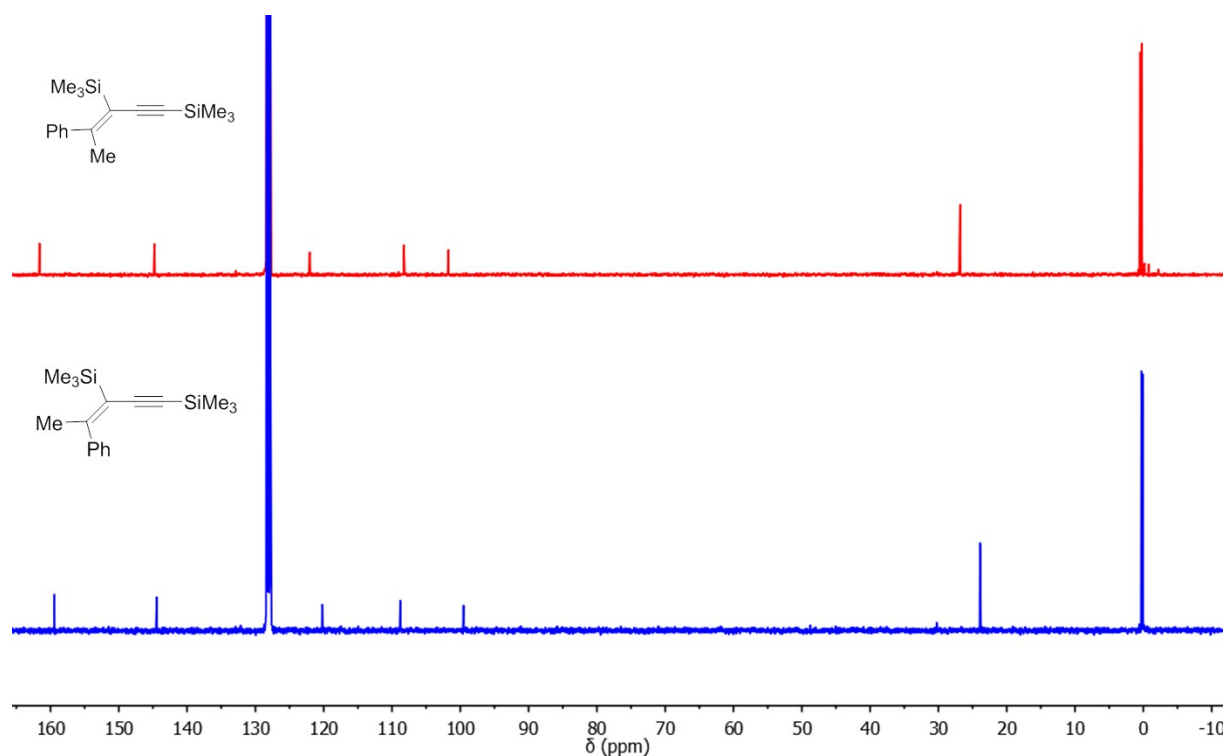

**Figure S17:**  $^{13}\text{C}\{^1\text{H}\}$  NMR spectrum of **5E** and **5Z** (25 °C,  $[\text{D}_6]$ benzene, 100.61 MHz).

## 5.6. $^1\text{H}$ and $^{13}\text{C}$ NMR spectra of 6 isomer mixture

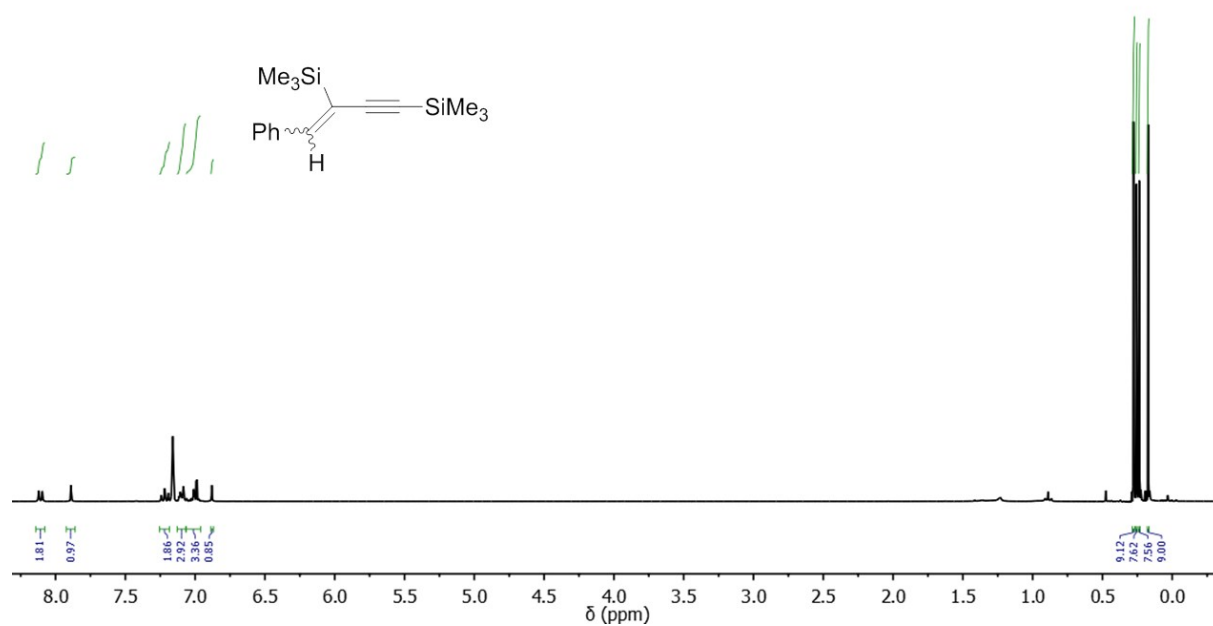

Figure S18:  $^1\text{H}$  NMR spectrum of  $E/Z$  isomer mixture 6 (25 °C,  $[\text{D}_6]$ benzene, 400.13 MHz).

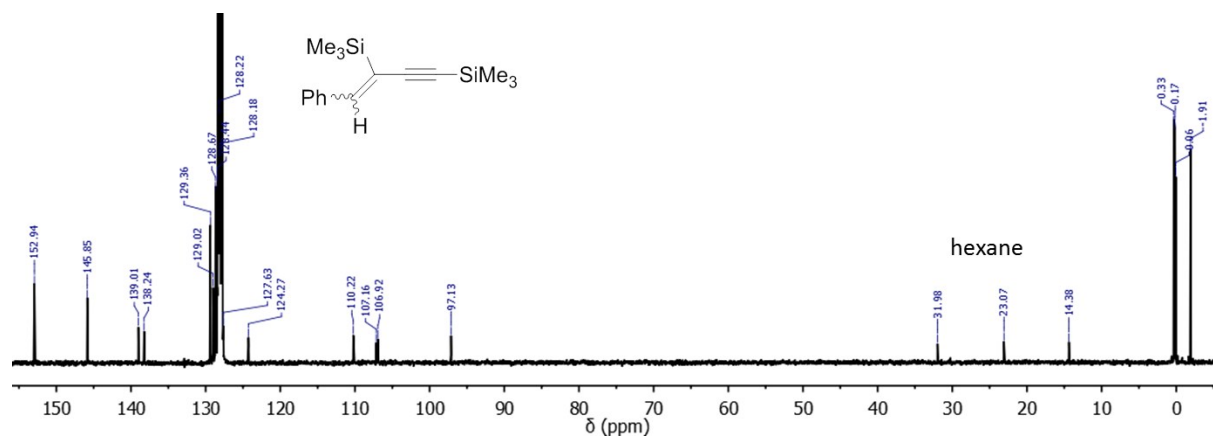

Figure S19:  $^{13}\text{C}\{^1\text{H}\}$  NMR spectrum of  $E/Z$  isomer mixture 6 (25 °C,  $[\text{D}_6]$ benzene, 100.61 MHz).

## 5.7. $^1\text{H}$ and $^{13}\text{C}$ NMR spectra of 7

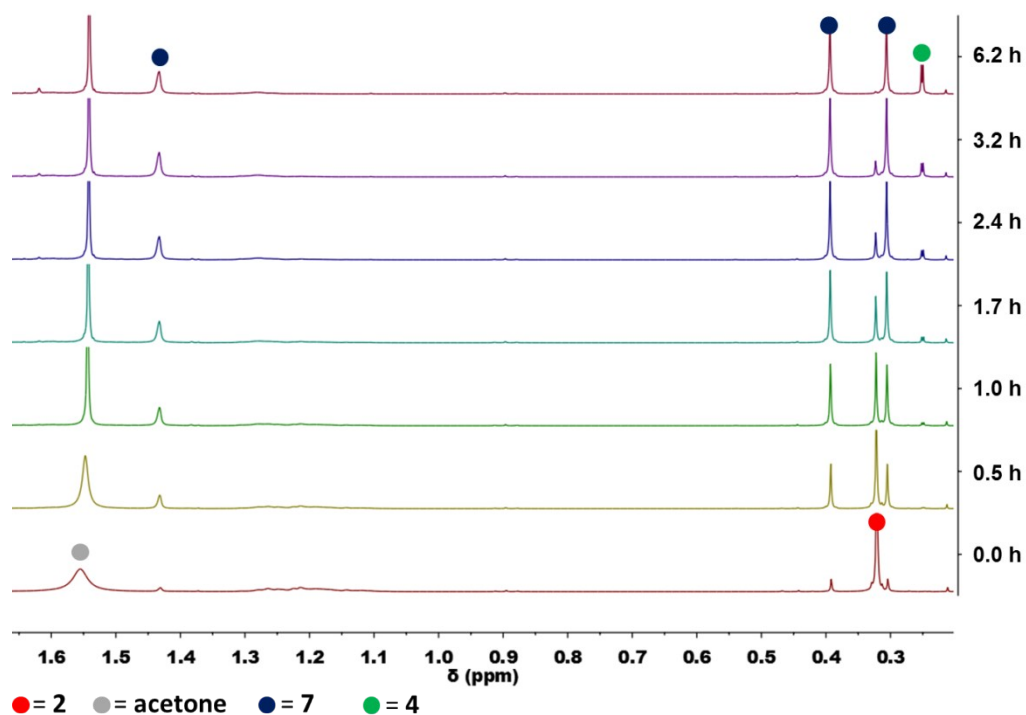

**Figure S20:** A series of time-dependent low temperature  $^1\text{H}$  NMR spectra shows the formation of 4 from 2 and acetone via 7 as intermediate species (-10 °C,  $[\text{D}_8]\text{toluene}$ , 400.13 MHz, high field).

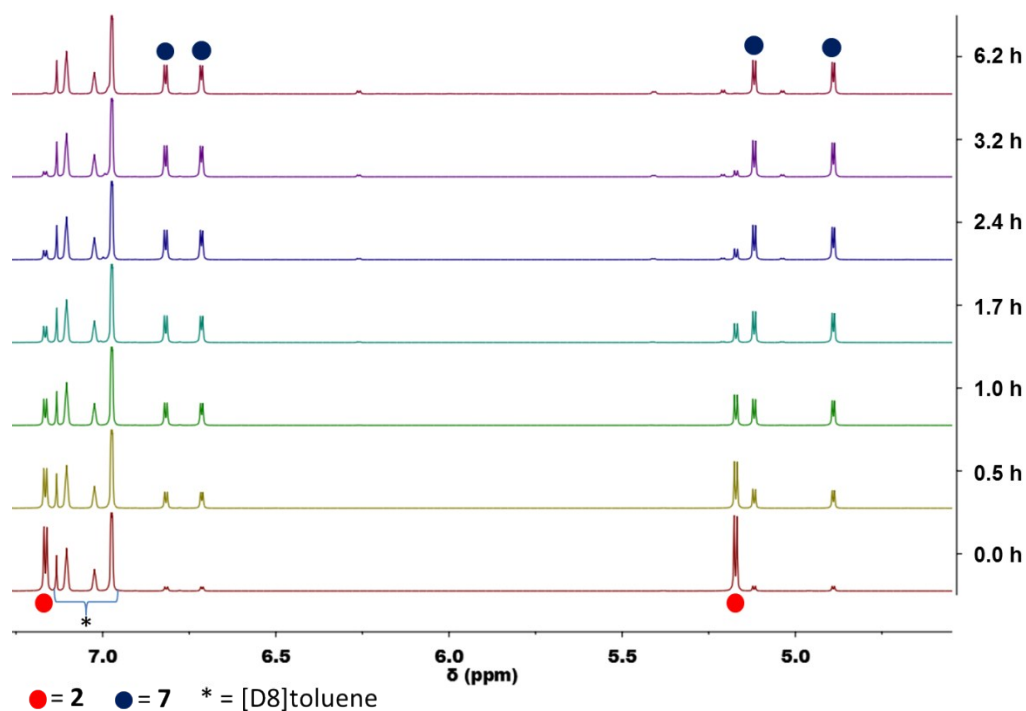

**Figure S21:** A series of time-dependent low temperature  $^1\text{H}$  NMR spectra shows the formation of 4 from 2 and acetone via 7 as intermediate species (-10 °C,  $[\text{D}_8]\text{toluene}$ , 400.13 MHz, low field).



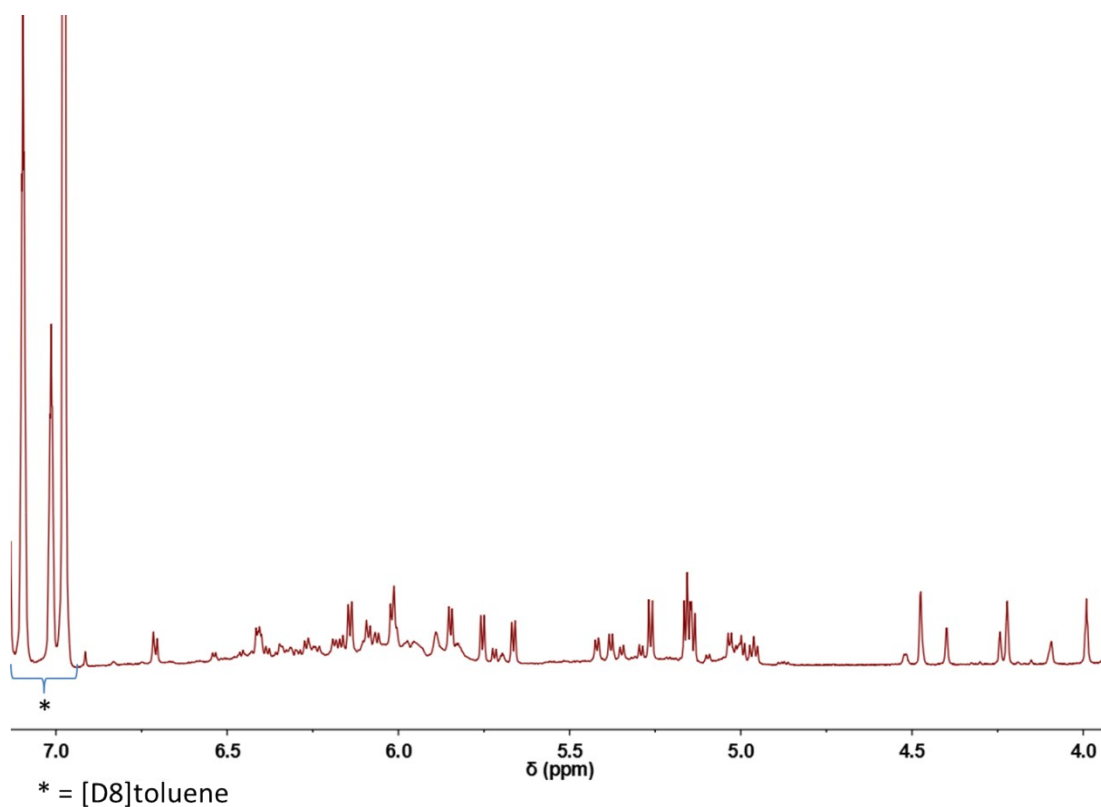

**Figure S22:** This  $^1\text{H}$  NMR spectrum was recorded after storing the sample used before (Figure S20 and Figure S21) for 1 day at ambient temperature. It is easy to see from this that the [EBTHI] species under the given conditions is subject to a complex chemical sequence forming a series of unidentified products.

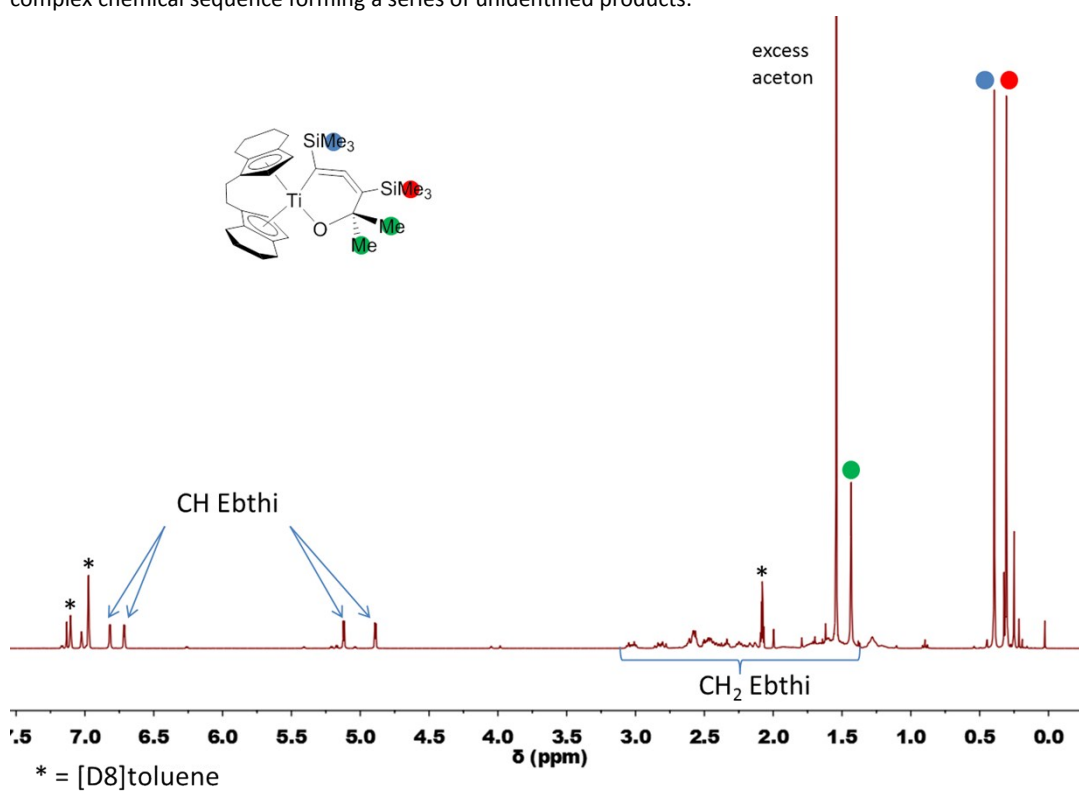

**Figure S23:**  $^1\text{H}$  NMR spectrum of **7** (-10 °C, [D<sub>8</sub>]toluene, 400.13 MHz). For this spectrum we carried out a low temperature NMR experiment, where the complex **2** was dissolved in [D<sub>8</sub>]toluene at ambient temperature; the resulting red solution was then cooled to -50 °C and an excess of acetone was added at this temperature. The sample was positioned in the cooled NMR spectrometer and the reaction was monitored via  $^1\text{H}$  NMR spectra. This spectrum was recorded after approximately 3 hours reaction time.

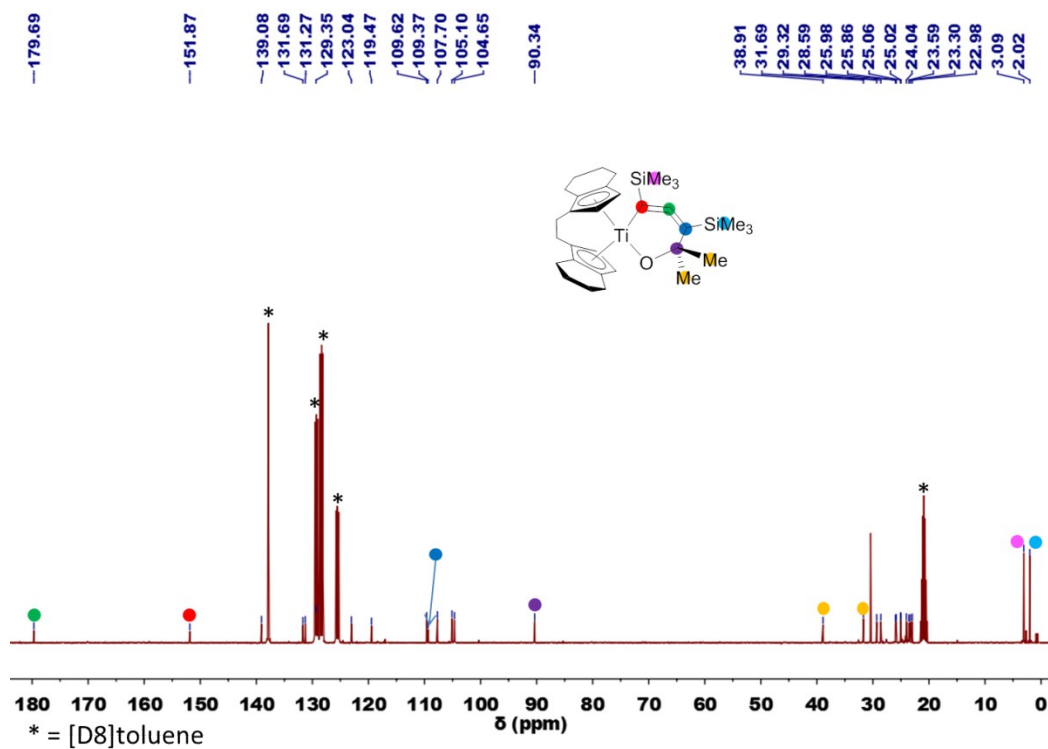

**Figure S24:** <sup>13</sup>C NMR spectrum of **7** (-10 °C, [D<sub>8</sub>]toluene, 100.61 MHz). Assignment was done with the help of two dimensional <sup>1</sup>H,<sup>13</sup>C HBMBC spectroscopy.

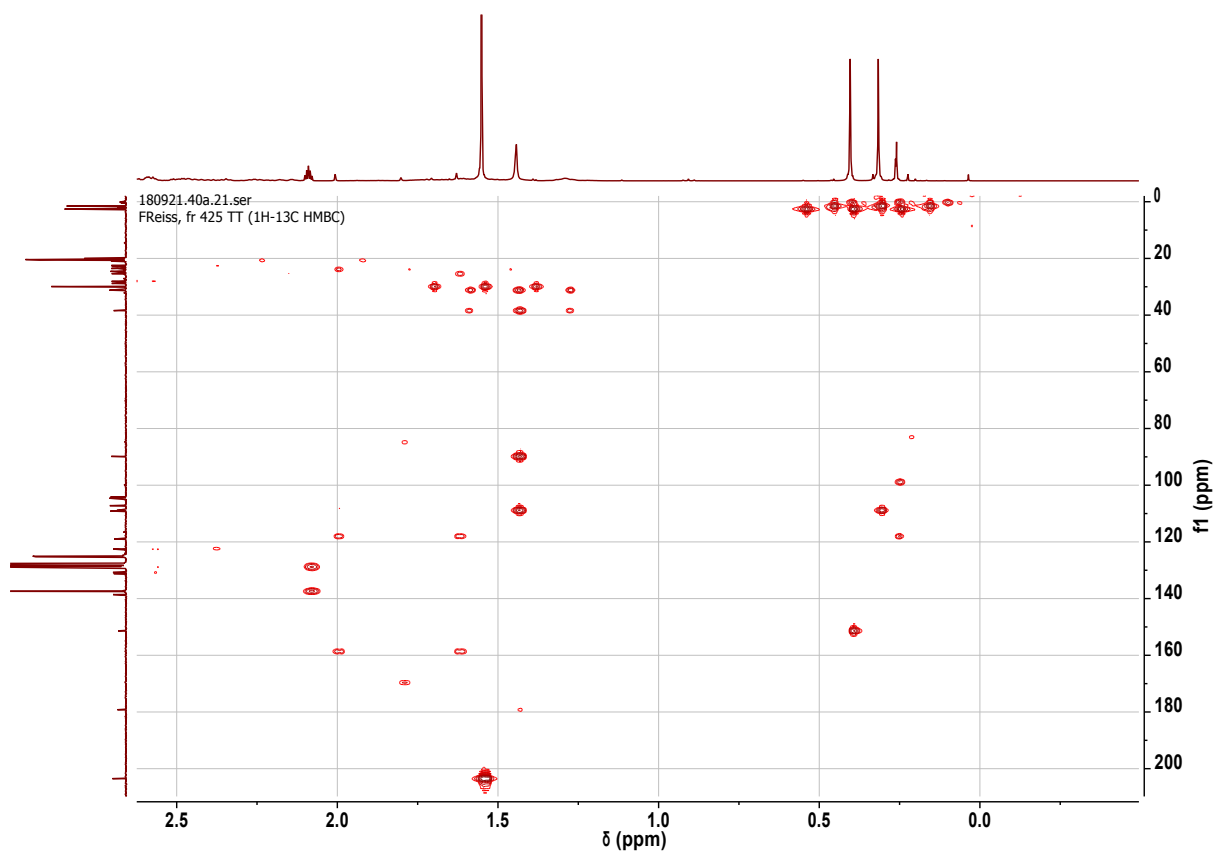

**Figure S25:** <sup>1</sup>H-<sup>13</sup>C HBMBC NMR spectrum of **7** (-10 °C, [D<sub>8</sub>]toluene, 400.13 MHz, cutout of the high-field region).

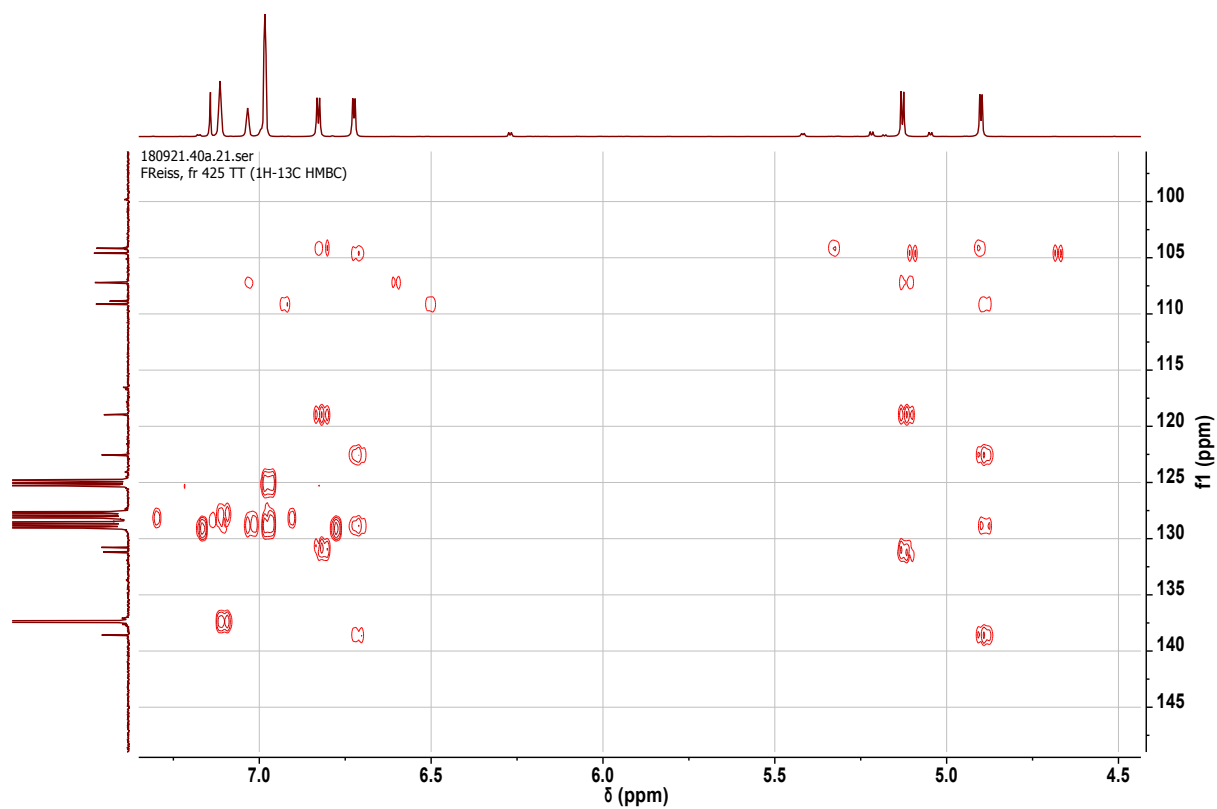

**Figure S26:**  $^1\text{H}$ - $^{13}\text{C}$  HMBC NMR spectrum of **7** (-10 °C,  $[\text{D}_8]$ toluene, 400.13 MHz, cutout of the high-field region).

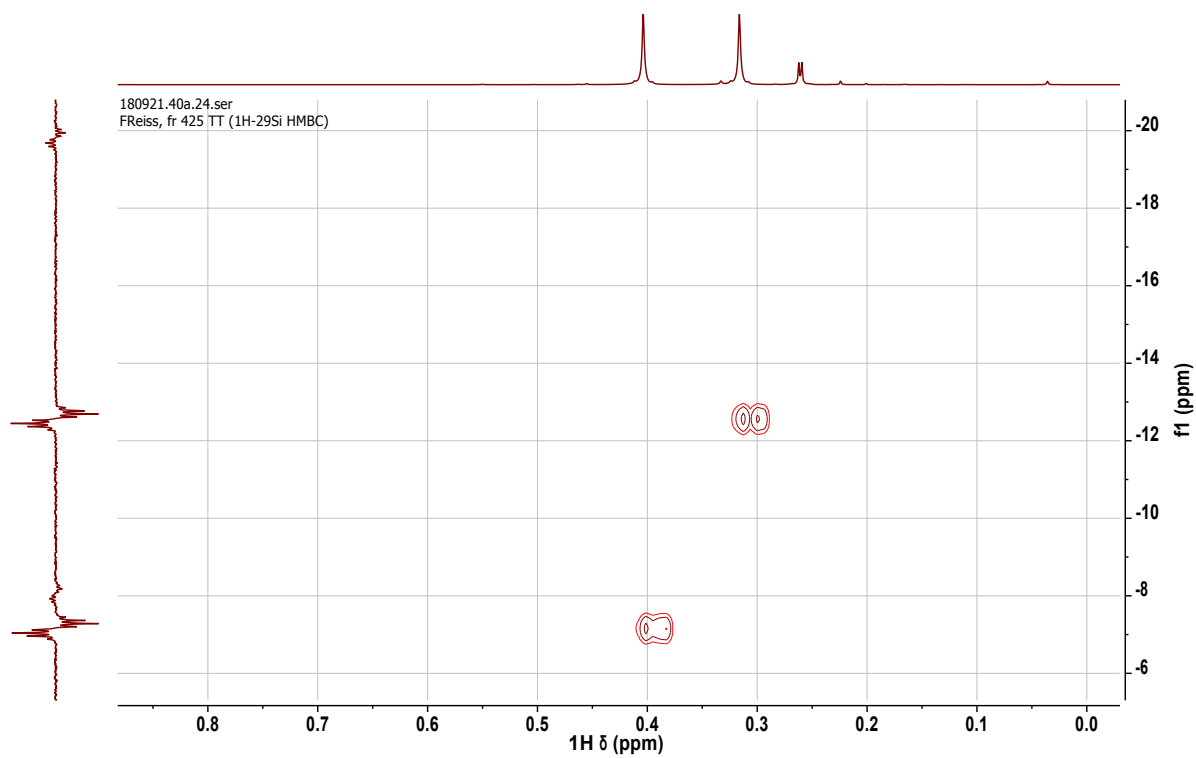

**Figure S27:**  $^1\text{H}$ - $^{29}\text{Si}$  HMBC NMR spectrum of **7** (-10 °C,  $[\text{D}_8]$ toluene, 400.13 MHz).

## 5.8. $^1\text{H}$ and $^{13}\text{C}$ NMR spectra of **8**.

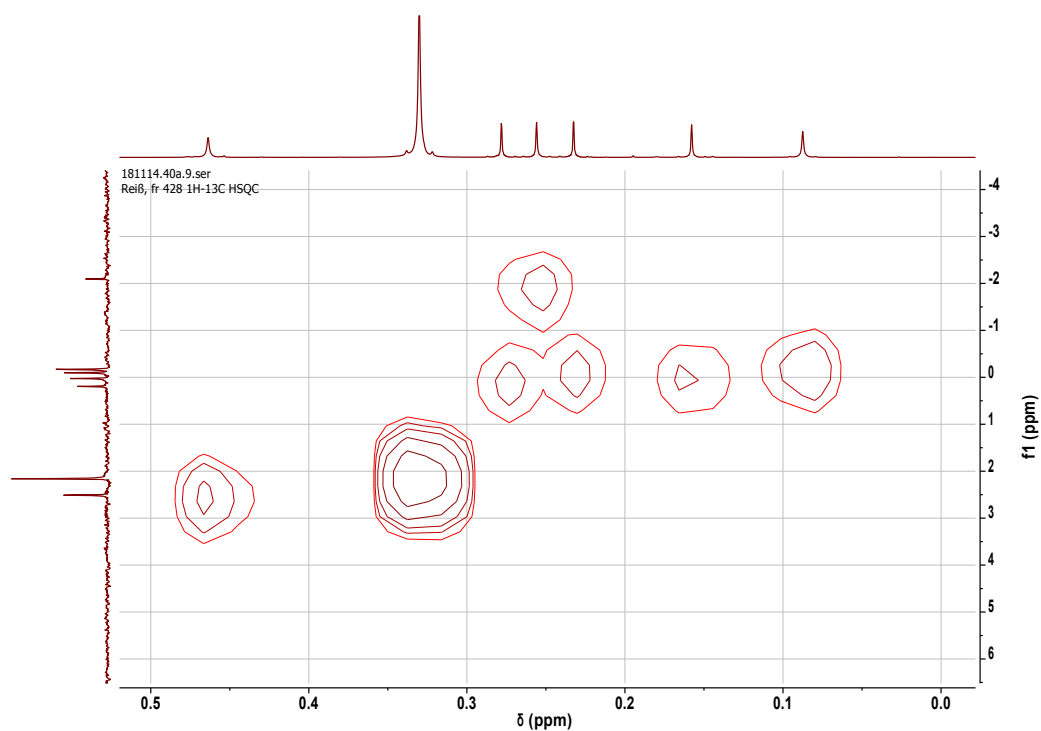

**Figure S28:**  $^1\text{H}$ - $^{13}\text{C}$  HSQC NMR spectrum of **8** (-10 °C,  $[\text{D}_8]$ toluene, 400.13 MHz, Cutout of the high-field region).

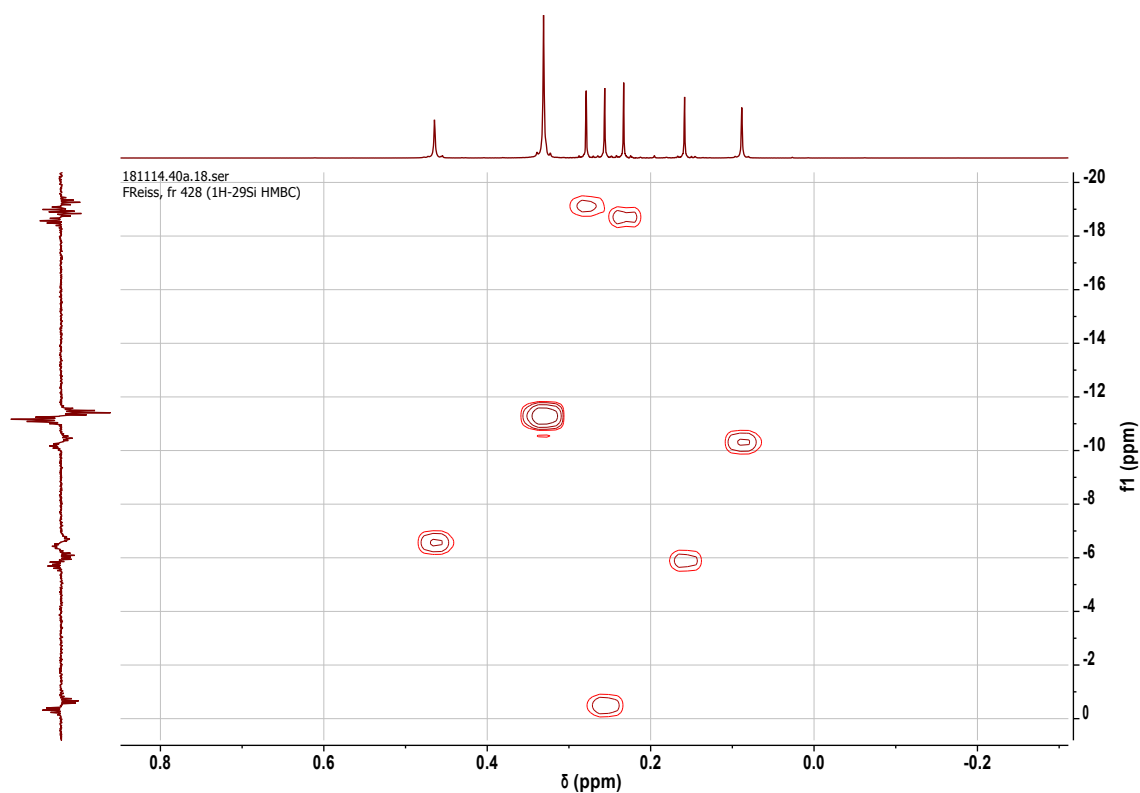

**Figure S29:**  $^1\text{H}$ - $^{29}\text{Si}$  HMBC NMR spectrum of **8** (-10 °C,  $[\text{D}_8]$ toluene, 400.13 MHz, Cutout of the high-field region).

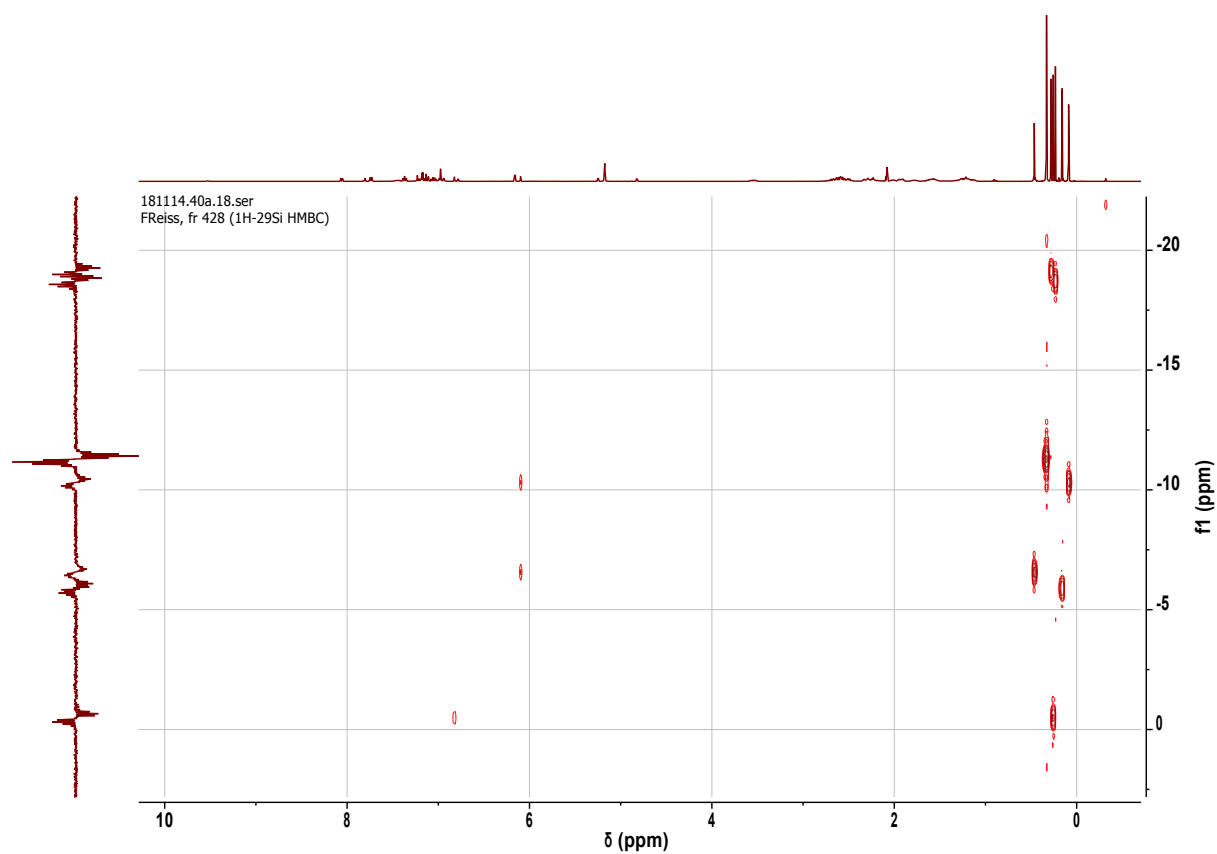

**Figure S30:**  $^1\text{H}$ - $^{29}\text{Si}$  HMBC NMR spectrum of **8** (-10 °C,  $[\text{D}_8]$ toluene, 400.13 MHz).

## 6. Details of vibrational spectroscopy

### 6.1. Assignment of the most important vibrations

In this chapter the experimental IR and Raman spectra (black) with their respective calculated uncorrected vibration spectra (red) are presented. The calculated spectra were taken from the frequency analyses with BP86/LANL2DZ/TZVP level of theory.

**Table S7:** Assignment of the most important vibrations of compound **2**.

| Compound | C1=C2=C3<br>in-phase<br>vib. calc. | C1=C2=C3<br>in-phase<br>vib. exp. | C1=C2=C3<br>out-of-<br>phase vib.<br>calc. | C1=C2=C3<br>out-of-<br>phase vib.<br>exp. |
|----------|------------------------------------|-----------------------------------|--------------------------------------------|-------------------------------------------|
| <b>2</b> | 1343 cm <sup>-1</sup>              | 1344 cm <sup>-1</sup>             | 1787 cm <sup>-1</sup>                      | 1729 cm <sup>-1</sup>                     |
| <b>7</b> | [a]                                | [a]                               | 1840 cm <sup>-1</sup>                      | 1805 cm <sup>-1</sup>                     |

[a] No Raman spectrum was collected of this intermediate species.

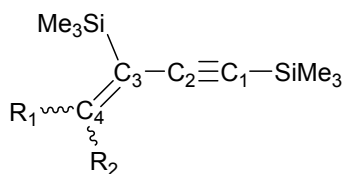

**Figure S31:** General carbon atom assignment for compounds **3-6**.

**Table S8:** Assignment of the most important vibrations of compounds **1, 3, 4, 5 and 6**.

| Compound  | C <sub>2</sub> =C <sub>3</sub><br>stretch<br>calc. <sup>[a]</sup> | C <sub>2</sub> =C <sub>3</sub><br>stretch<br>exp. | C <sub>3</sub> =C <sub>4</sub><br>stretch<br>calc. | C <sub>3</sub> =C <sub>4</sub><br>stretch<br>exp. | C <sub>1</sub> ≡C <sub>2</sub><br>stretch<br>calc.     | C <sub>1</sub> ≡C <sub>2</sub><br>stretch<br>exp.      |
|-----------|-------------------------------------------------------------------|---------------------------------------------------|----------------------------------------------------|---------------------------------------------------|--------------------------------------------------------|--------------------------------------------------------|
| <b>1</b>  | 1133 cm <sup>-1</sup>                                             | 1140 cm <sup>-1</sup>                             | 1457 cm <sup>-1</sup>                              | 1462 cm <sup>-1</sup>                             | 2104 cm <sup>-1</sup> [c]<br>2132 cm <sup>-1</sup> [d] | 2099 cm <sup>-1</sup> [c]<br>2121 cm <sup>-1</sup> [d] |
| <b>3</b>  | 1092 cm <sup>-1</sup>                                             | 1106 cm <sup>-1</sup>                             | 1503 cm <sup>-1</sup>                              | 1534 cm <sup>-1</sup>                             | 2125 cm <sup>-1</sup>                                  | 2120 cm <sup>-1</sup>                                  |
| <b>4</b>  | 1134 cm <sup>-1</sup>                                             | 1128 cm <sup>-1</sup>                             | 1573 cm <sup>-1</sup>                              | 1586 cm <sup>-1</sup>                             | 2136 cm <sup>-1</sup>                                  | 2117 cm <sup>-1</sup>                                  |
| <b>5E</b> | 1121 cm <sup>-1</sup>                                             | 1125 cm <sup>-1</sup>                             | 1539 cm <sup>-1</sup>                              | 1552 cm <sup>-1</sup>                             | 2133 cm <sup>-1</sup>                                  | 2115 cm <sup>-1</sup>                                  |
| <b>5Z</b> | 1135 cm <sup>-1</sup>                                             | 1137 cm <sup>-1</sup>                             | 1546 cm <sup>-1</sup>                              | 1559 cm <sup>-1</sup>                             | 2134 cm <sup>-1</sup>                                  | 2112 cm <sup>-1</sup>                                  |
| <b>6E</b> | 1054 cm <sup>-1</sup>                                             | 1062 cm <sup>-1</sup>                             | 1545 cm <sup>-1</sup>                              | [b]                                               | 2122 cm <sup>-1</sup>                                  | [b]                                                    |
| <b>6Z</b> | 1110 cm <sup>-1</sup>                                             | 1111 cm <sup>-1</sup>                             | 1540 cm <sup>-1</sup>                              | [b]                                               | 2136 cm <sup>-1</sup>                                  | [b]                                                    |

[a] This vibration mixes strongly with CH vibrations of the substituents at carbon atom C4. [b] Vibrations cannot be unambiguously assigned. [c] C<sub>1</sub>≡C<sub>2</sub> and C<sub>1</sub>'≡C<sub>2</sub>' in-phase vibration [d] C<sub>1</sub>≡C<sub>2</sub> and C<sub>1</sub>'≡C<sub>2</sub>' out-of-phase vibration

## 6.2. Experimental and calculated vibrational spectra

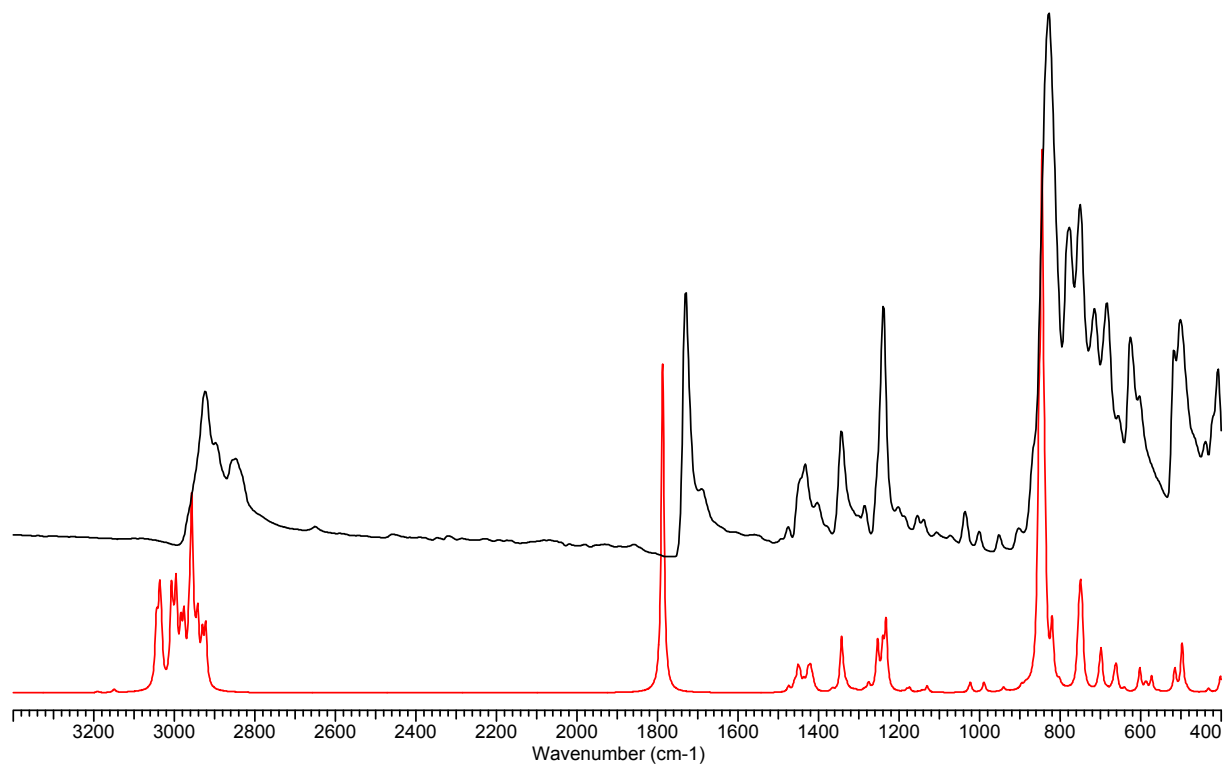

**Figure S32:** Experimental (black) and calculated (red) IR spectra of **2**

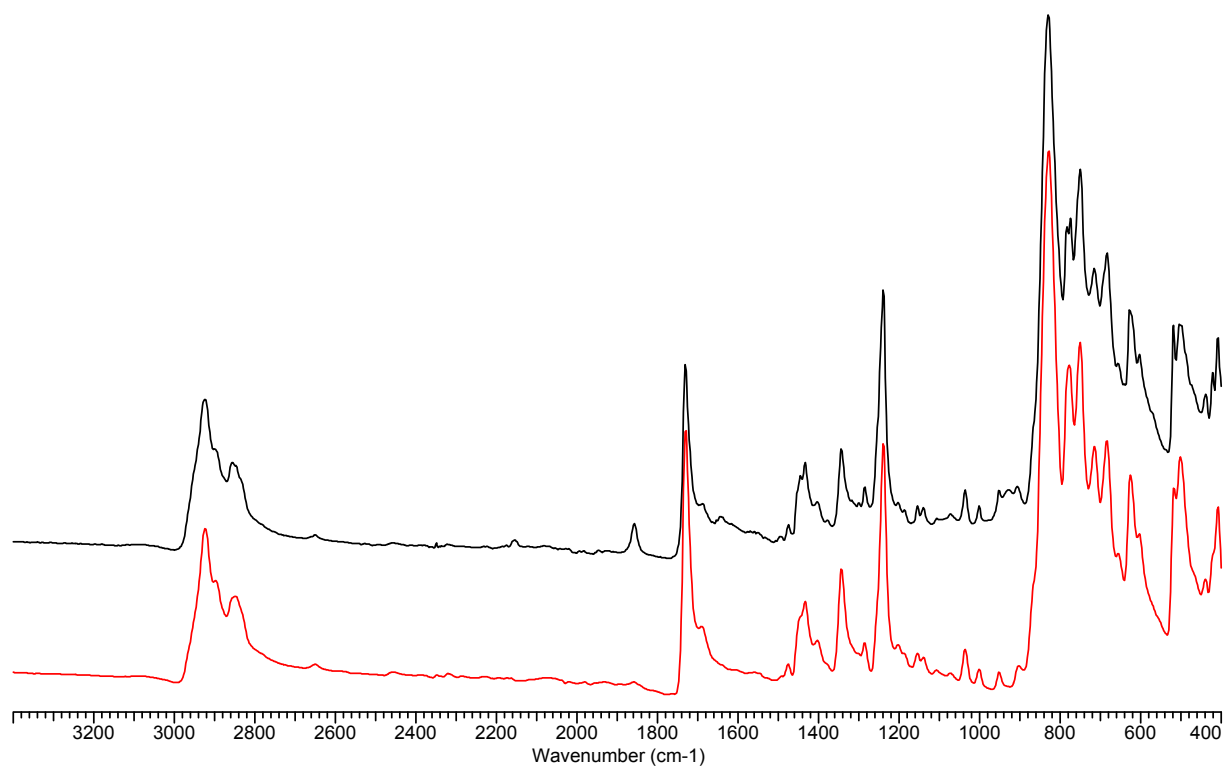

**Figure S33:** IR spectra of **2** immediately measured (red) and after 2 minutes exposure to air (black). The black spectrum features a characteristic vibration at 2157 cm<sup>-1</sup> for the bis-(trimethylsilyl)-propyne.

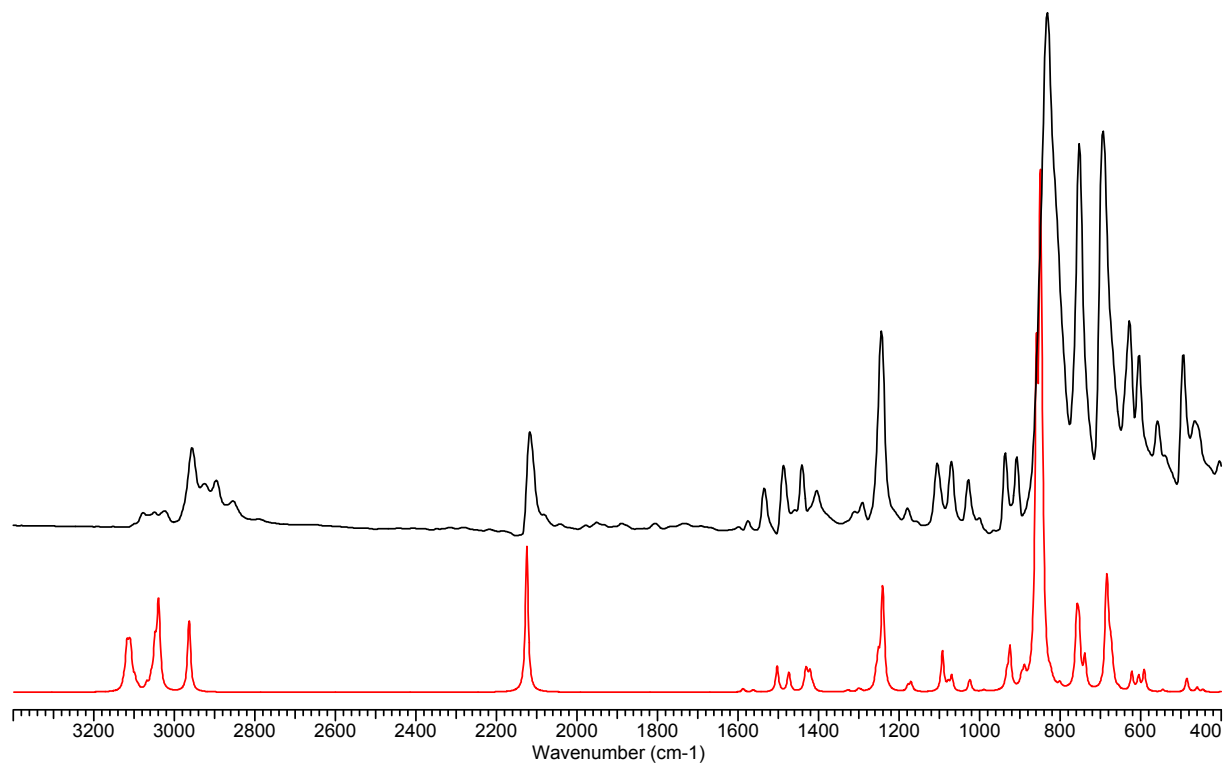

**Figure S34:** Experimental (black) and calculated (red) IR spectra of **3**.

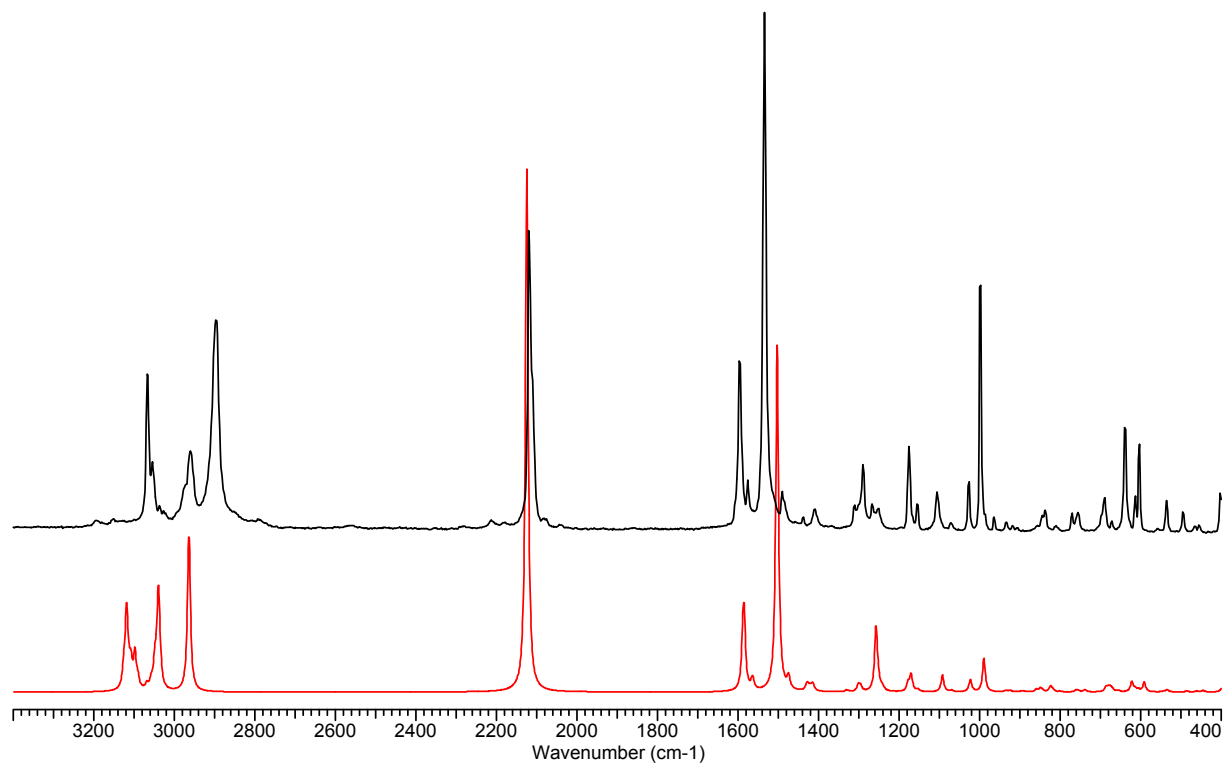

**Figure S35:** Experimental (black) and calculated (red) Raman spectra of **3**.



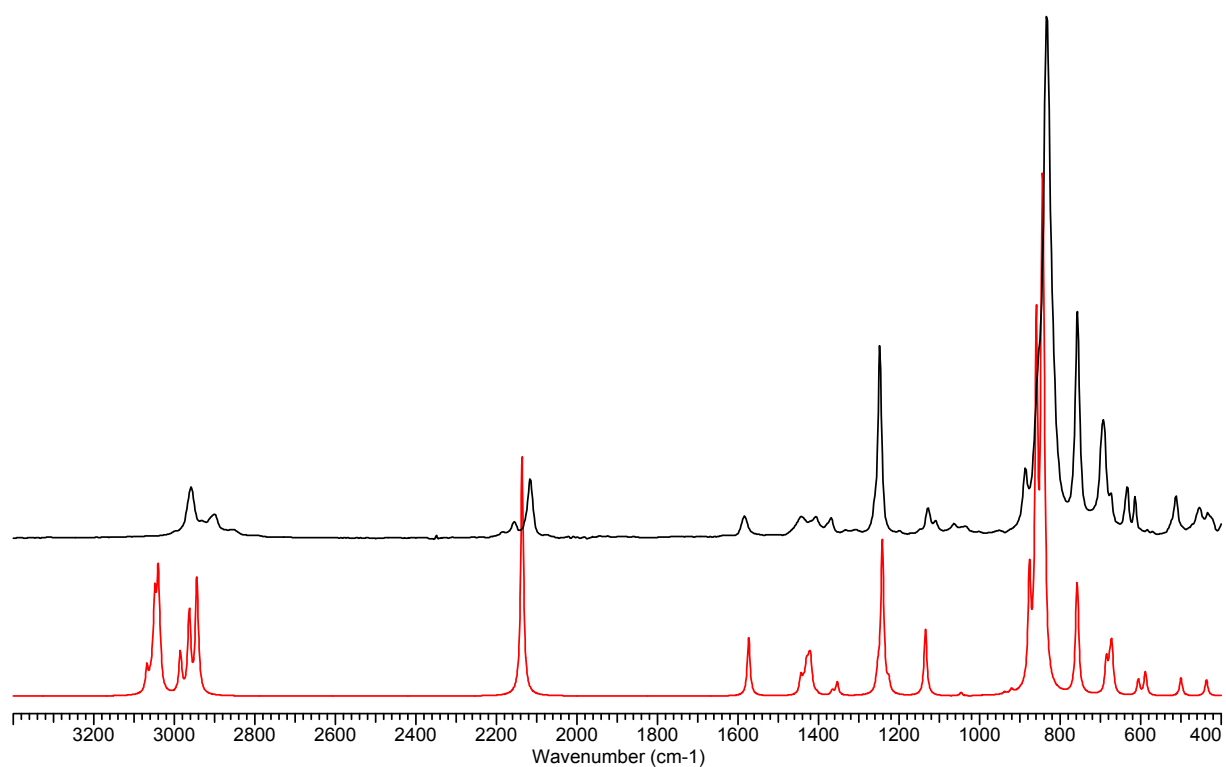

**Figure S36:** Experimental (black) and calculated (red) IR spectra of **4**.

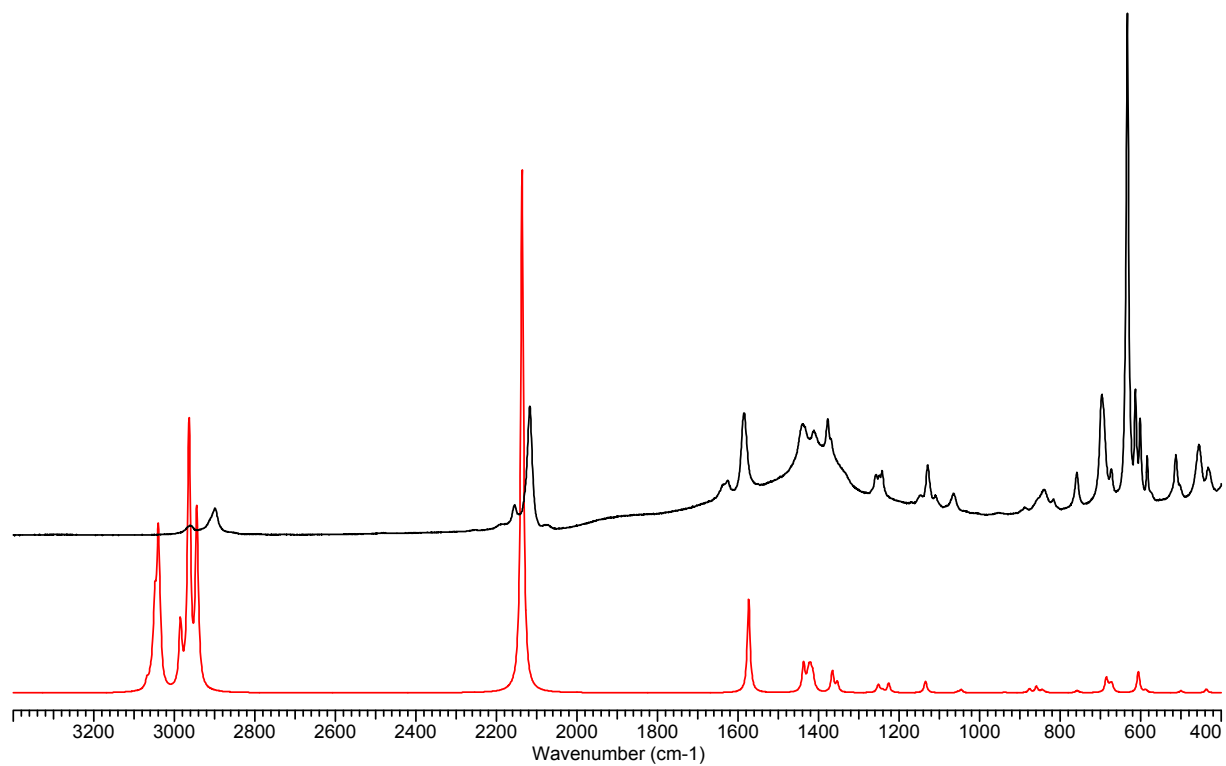

**Figure S37:** Experimental (black) and calculated (red) Raman spectra of **4**.

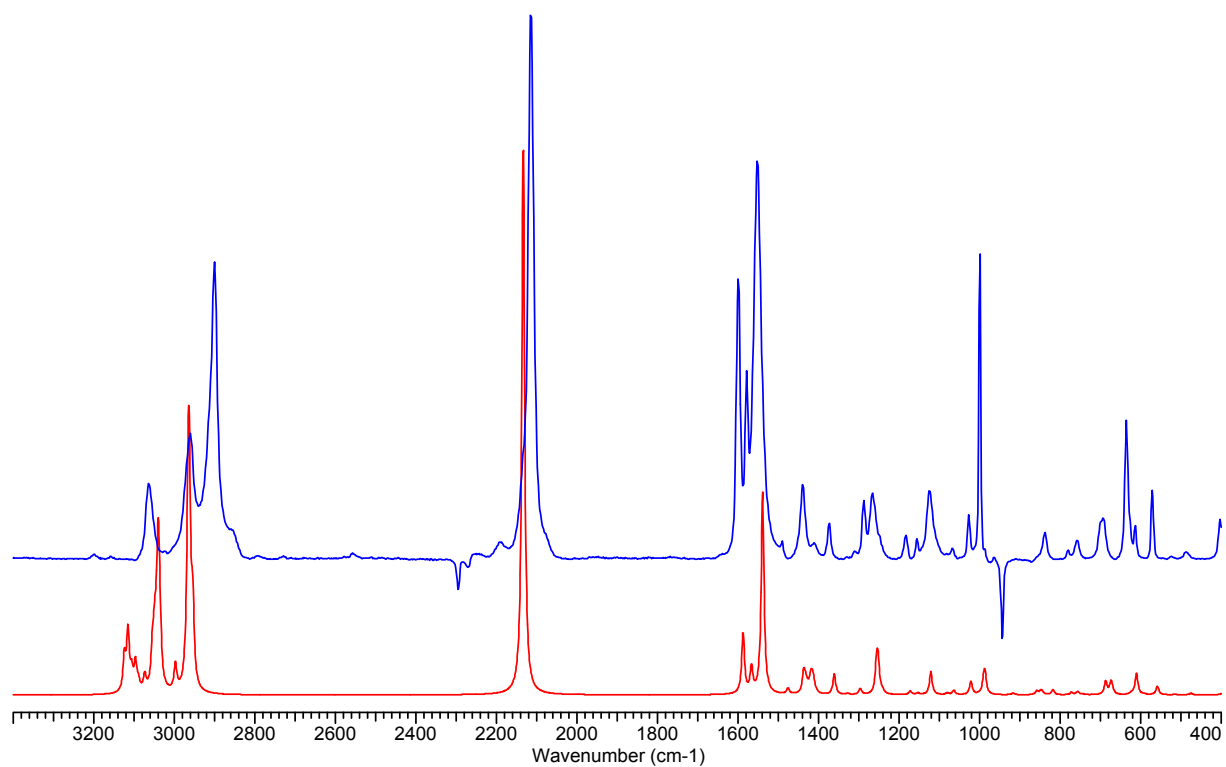

**Figure S38:** Calculated (red) and experimental (blue) Raman spectra of the *E*-isomer of **5**. The experimental spectrum was in this case baseline corrected and the vibrations of remained benzene are shown with negative values.

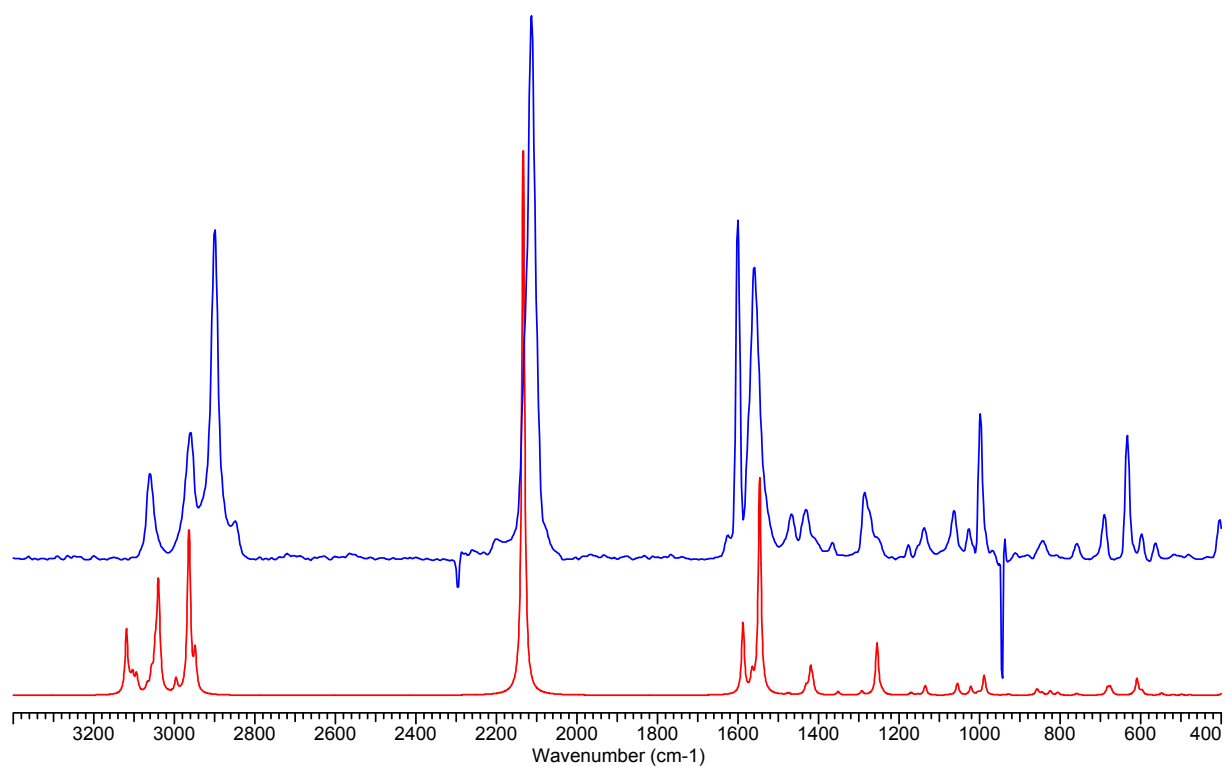

**Figure S39:** Calculated (red) and experimental (blue) Raman spectra of the *Z*-isomer of **5**. The experimental (blue) spectrum was in this case baseline corrected and the vibrations of remained benzene are shown with negative values.

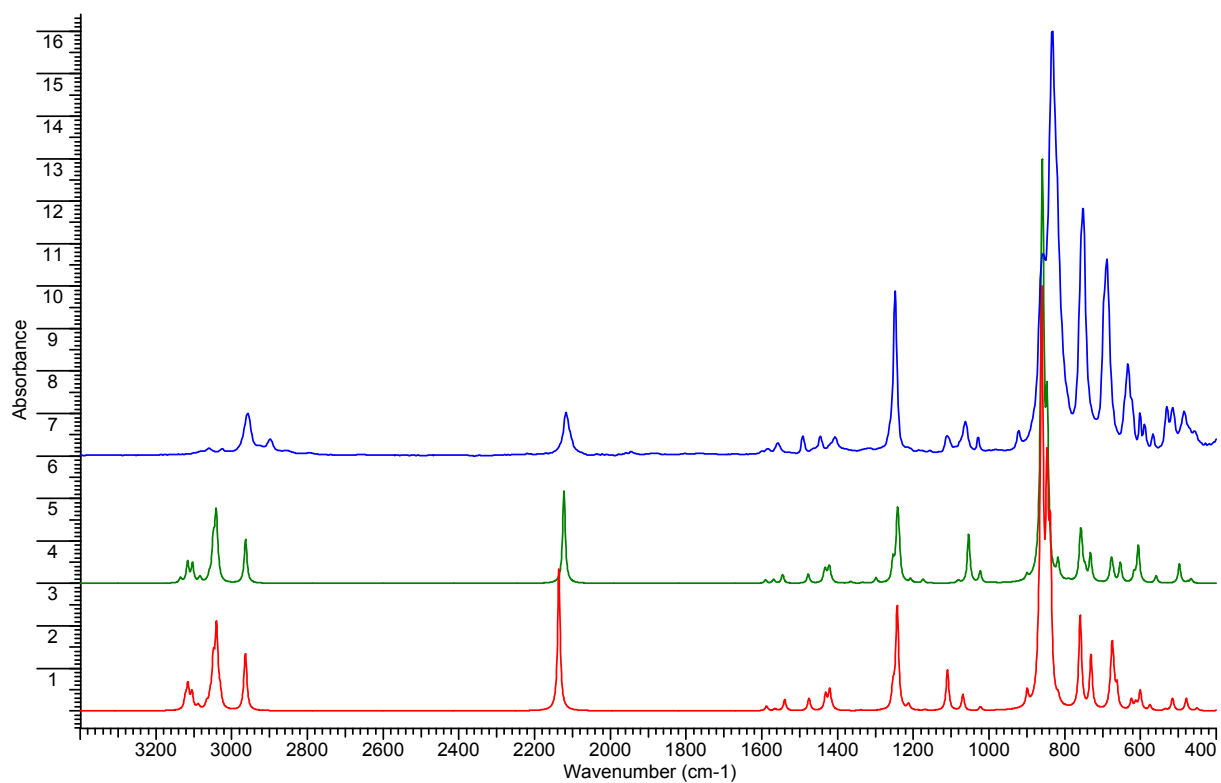

**Figure S40:** Experimental IR spectrum of isomer mixture of **6** (blue), calculated spectra for *E*-isomer (green) and *Z*-isomer (red).

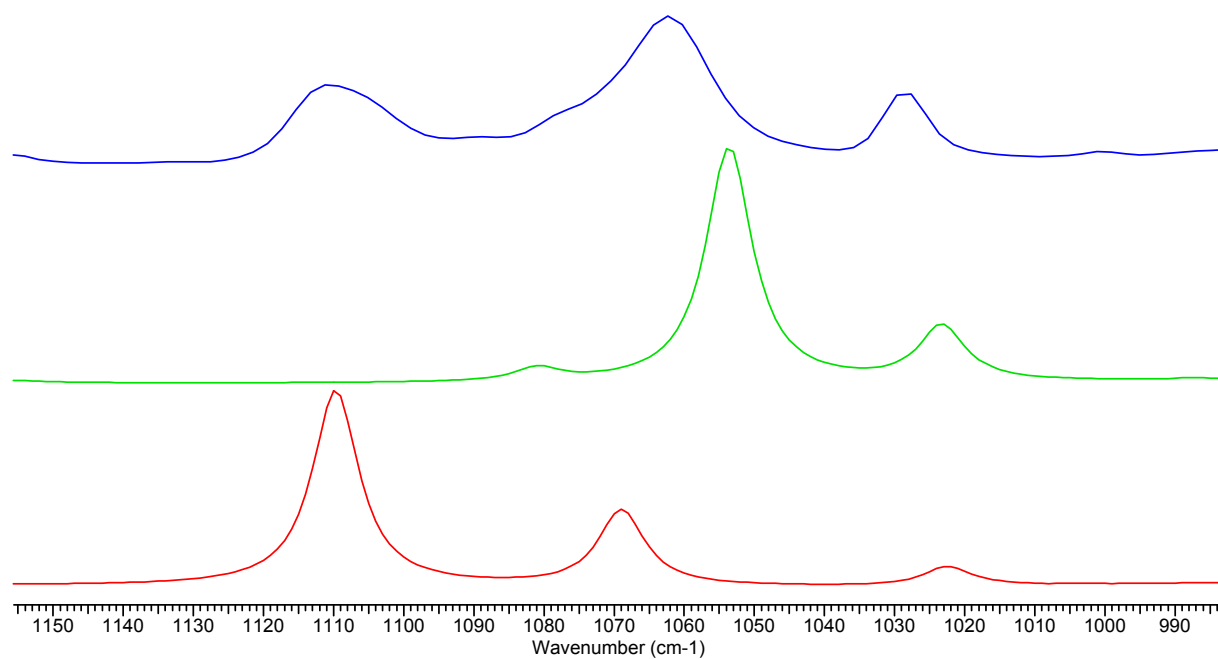

**Figure S41:** Representation of a selection of the IR spectra of **6** with the most noticeable differences of the *E/Z*-isomers which can be assigned to the CH in plane vibrations of the phenyl substituents which are mixed with CC stretching vibrations. Red line represents the calculated spectrum of the *Z* isomer, green for the *E* isomer and the blue spectrum

represents the experimental spectrum, which clearly shows the resulting product as a mixture of *E* and *Z* isomer as confirmed by NMR spectroscopy.

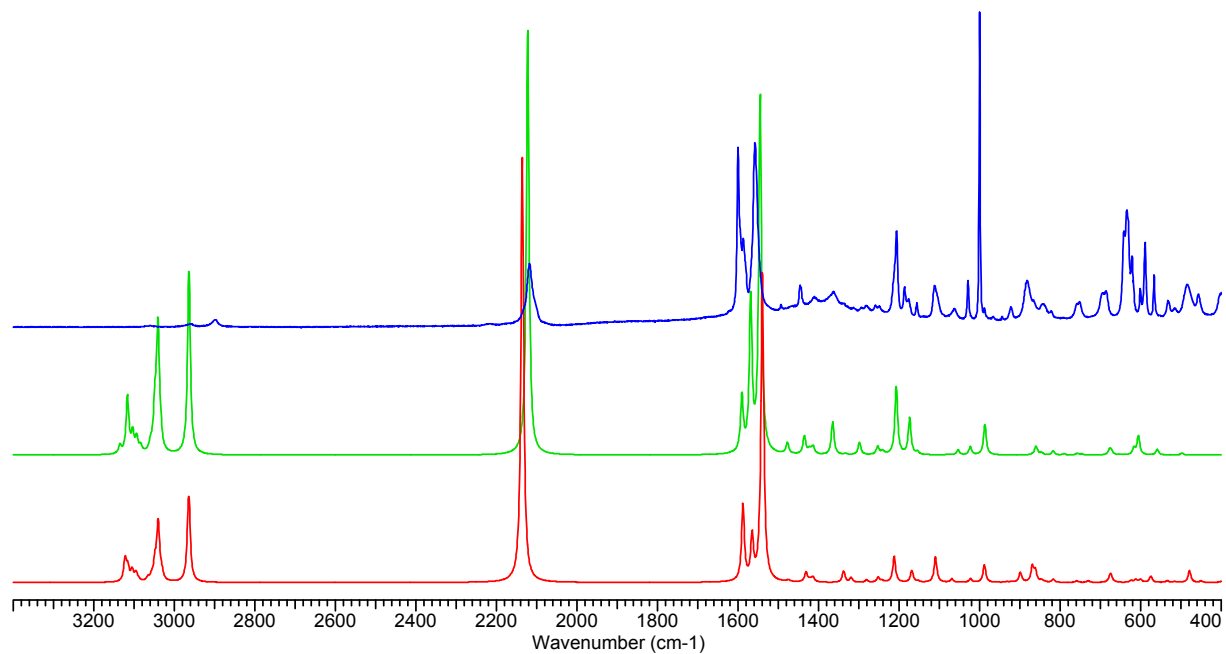

**Figure S42:** Experimental Raman spectra of isomer mixture of **6** (blue), calculated spectra for *E*-isomer (green) and *Z*-isomer (red).

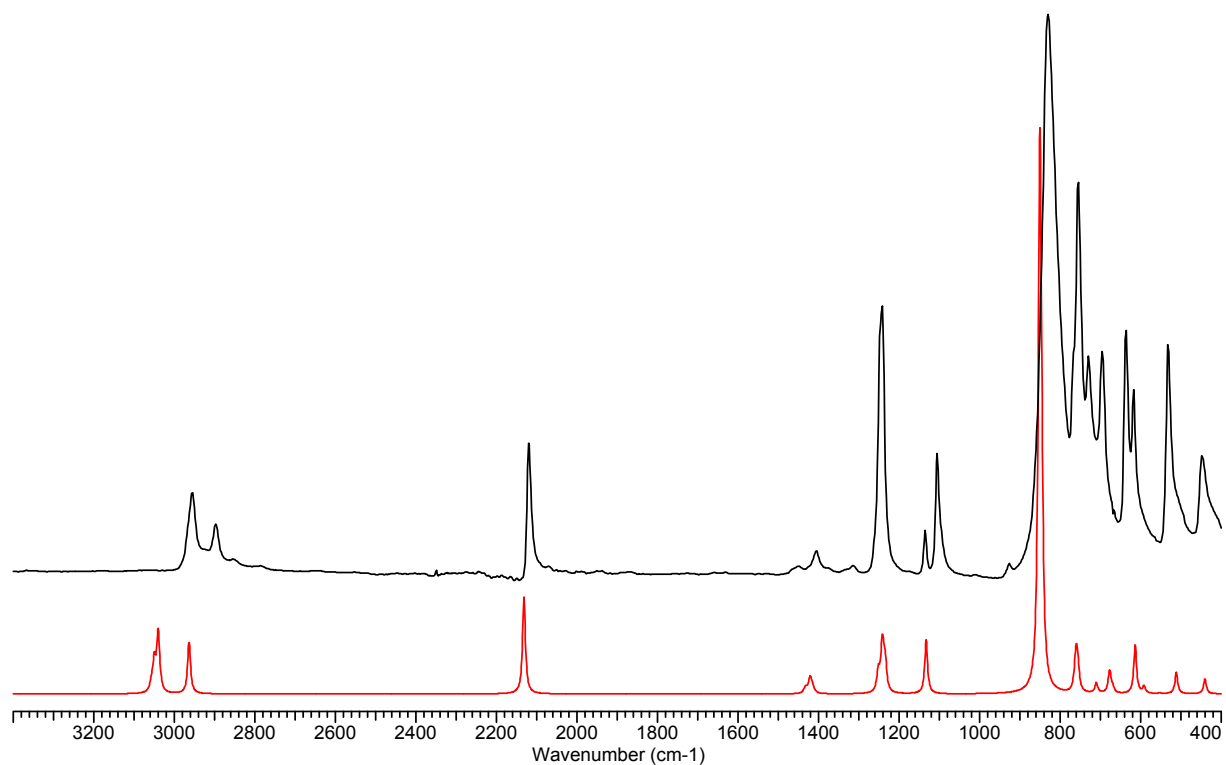

**Figure S43:** Experimental (black) and calculated (red) IR spectra of **1**.

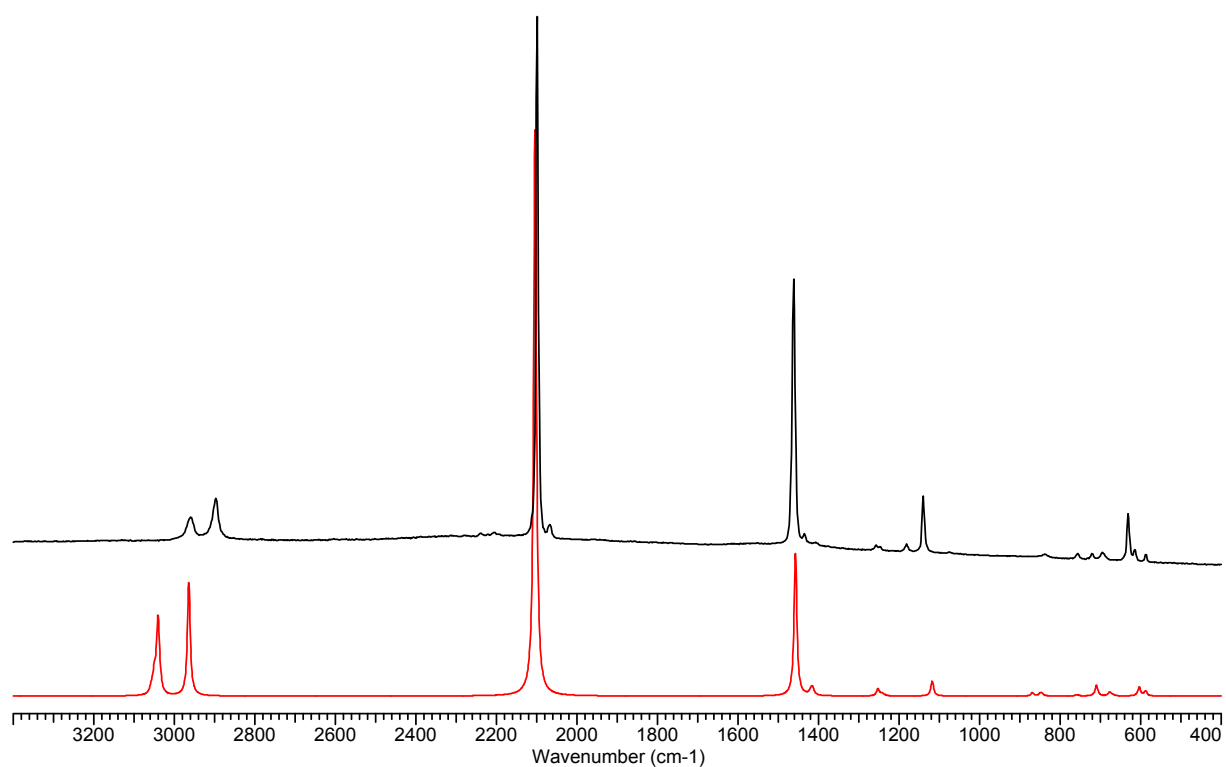

**Figure S44:** Experimental (black) and calculated (red) Raman spectra of **1**.

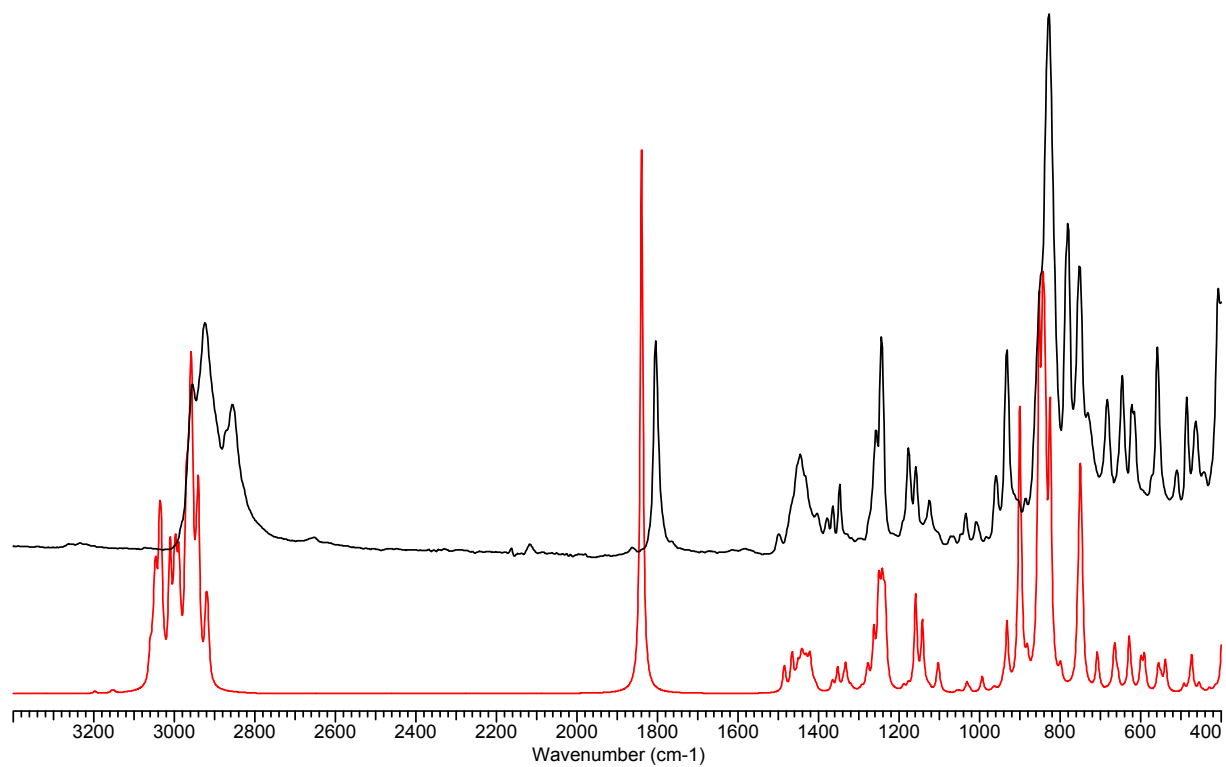

**Figure S45:** Experimental (black) and calculated (red) IR spectra of **7**.

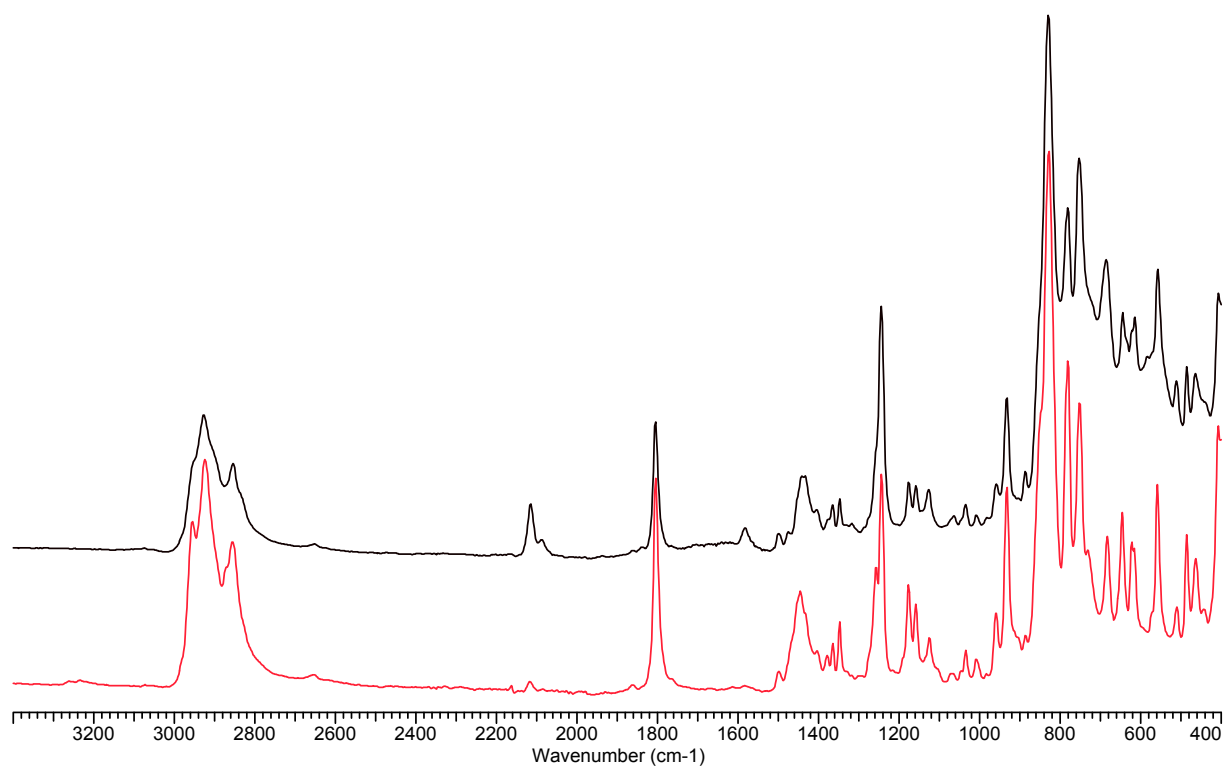

**Figure S46:** IR spectra of the intermediate species **7** immediately measured (red) and after 3 minutes exposure to air and ambient temperature (black). The black spectrum features a new characteristic vibration at 2115 cm<sup>-1</sup> which might be assigned to the C1≡C2 stretch vibration of **4** which is formed due to the ambient temperature measurement.

## 7. Computational Details

All calculations were carried out with the Gaussian 09 package of molecular orbital programs.<sup>6</sup> In a first step we carried out an optimisation test with real-size molecule **2**, in this study we compared the Methods BP86,<sup>12</sup> B3LYP<sup>12,13</sup> and PBE1PBE<sup>14</sup> as well as the basis sets def2-TZVP,<sup>15</sup> {TZVP(C, H, Si);<sup>16</sup> LANL2DZ(Ti)<sup>17</sup>} and aug-cc-pvdz.<sup>18</sup> The main result is that pure density functional (DF) BP86 in combination with the LANL2DZ basis set and corresponding effective core potential (ECP) at Ti and the TZVP basis set on all other atoms (notation BP86/LANL2DZ/TZVP) is clearly the best combination for the metallacyclic systems, both in terms of performance and HF energy (see Table S9). Therefore, if not further mentioned the energies and discussed results were performed with this procedure. Vibrational frequencies were also computed, to include zero-point vibrational energies in thermodynamic parameters and to characterise all structures as minima on the potential energy surface. In addition, we used these results to assign the experimental IR and RAMAN spectra and to superimpose the experimental and calculated vibration spectra (see above). NBO analyses were performed using NBO 6.0.<sup>19</sup> QT-AIM and ELF calculations were performed using MultiWfn 3.5.<sup>20</sup>

## 7.1. Comparison of Different Methods and Basis sets.

**Table S9:** Comparison of Different Methods and Basissets.

|                  |                                                                                                          |                                                                                                          |                                                                                                          |
|------------------|----------------------------------------------------------------------------------------------------------|----------------------------------------------------------------------------------------------------------|----------------------------------------------------------------------------------------------------------|
| Method           | BP86                                                                                                     | B3LYP                                                                                                    | PBE1PBE                                                                                                  |
| Basis set        | def2TZVP                                                                                                 | def2TZVP                                                                                                 | def2TZVP                                                                                                 |
| Complex <b>2</b> | HF= -2559.5008685<br>ZPE= 383.50824<br>(Kcal/Mol)<br>NImag=0<br>Htot= -2558.850669<br>Gtot= -2558.956402 | HF= -2559.4045565<br>ZPE= 394.72178<br>(Kcal/Mol)<br>NImag=0<br>Htot= -2558.737339<br>Gtot= -2558.841994 | HF= -2557.5462952<br>ZPE= 396.57926<br>(Kcal/Mol)<br>NImag=0<br>Htot= -2556.876393<br>Gtot= -2556.979888 |
| CPU Time         | 2 d 15 h 20 m 34.2 s                                                                                     | 8 d 4 h 43 m 11.1 s                                                                                      | 8 d 3 h 45 m 55.4 s                                                                                      |
| Method           | BP86                                                                                                     | B3LYP                                                                                                    | PBE1PBE                                                                                                  |
| Basis set        | TZVP (C,H,Si)<br>LANL2DZ (Ti)                                                                            | TZVP (C,H,Si)<br>LANL2DZ (Ti)                                                                            | TZVP (C,H,Si)<br>LANL2DZ (Ti)                                                                            |
| Complex <b>2</b> | HF= -1767.9906562<br>ZPE= 383.54489<br>(Kcal/Mol)<br>NImag=0<br>Htot= -1767.340175<br>Gtot= -1767.446884 | HF= -1767.9472903<br>ZPE= 395.07474<br>(Kcal/Mol)<br>NImag=0<br>Htot= -1767.279437<br>Gtot= -1767.383899 | HF= -1766.2766448<br>ZPE= 397.24288<br>(Kcal/Mol)<br>NImag=0<br>Htot= -1765.605673<br>Gtot= -1765.709098 |
| CPU Time         | 0 d 22 h 38 m 49.7 s                                                                                     | 1 d 19 h 13 m 19.8 s                                                                                     | 2 d 1 h 8 m 45.8 s                                                                                       |
| Method           | BP86                                                                                                     | B3LYP                                                                                                    | PBE1PBE                                                                                                  |
| Basis set        | aug-cc-pvdz                                                                                              | aug-cc-pvdz                                                                                              | aug-cc-pvdz                                                                                              |
| Complex <b>2</b> | No convergence<br>criteria met during<br>SCF Cycle even after<br>500 Steps                               | No convergence<br>criteria met during<br>SCF Cycle even after<br>500 Steps                               | No convergence<br>criteria met during<br>SCF Cycle even after<br>500 Steps                               |
| CPU Time         | -                                                                                                        | -                                                                                                        | -                                                                                                        |



## 7.2. Thermochemistry

For basic thermochemistry, molecular structures were optimised using the pure density functional (DF) BP86 in combination with the LANL2DZ basis set and corresponding ECP at Ti and the TZVP basis set on all other atoms (notation BP86/LANL2DZ/TZVP). All optimised structures were confirmed as minima by frequency analyses.

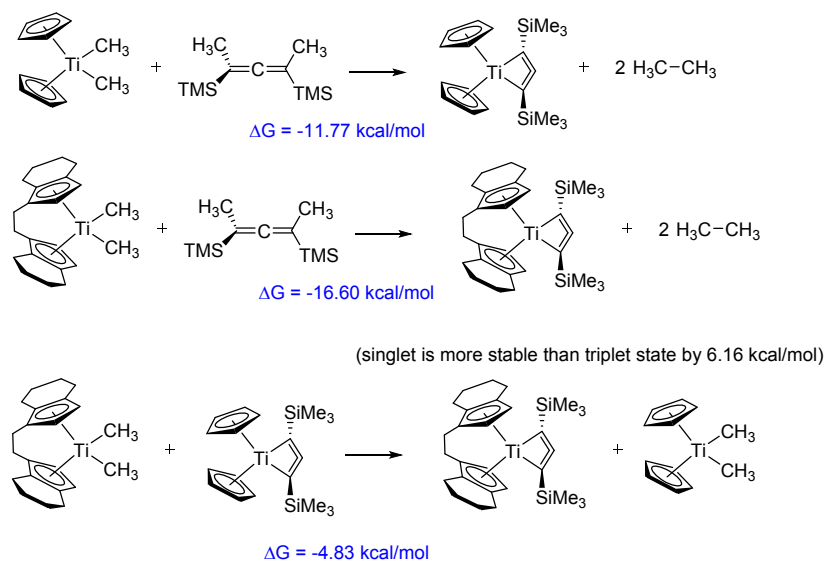

**Figure S47:** Calculated Gibbs free energies of isodesmic titanocene reactions.

**Table S10:** Summary of older Thermochemistry investigations data taken from reference 21.

Calculated Gibbs Free Energies (kcal·mol<sup>-1</sup>) for the syntheses of 1-metallacyclobuta-2,3-dienes and metallacyclopenta-2,3,4-trienes.

| precursor                                                   | Cp <sub>2</sub> TiMe <sub>2</sub> | Cp* <sub>2</sub> TiMe <sub>2</sub> |
|-------------------------------------------------------------|-----------------------------------|------------------------------------|
| Me(Me <sub>3</sub> Si)C <sub>3</sub> (SiMe <sub>3</sub> )Me | -11.77                            | -1.75 <sup>[t]</sup>               |

[t] Energy given for the more stable triplet state.

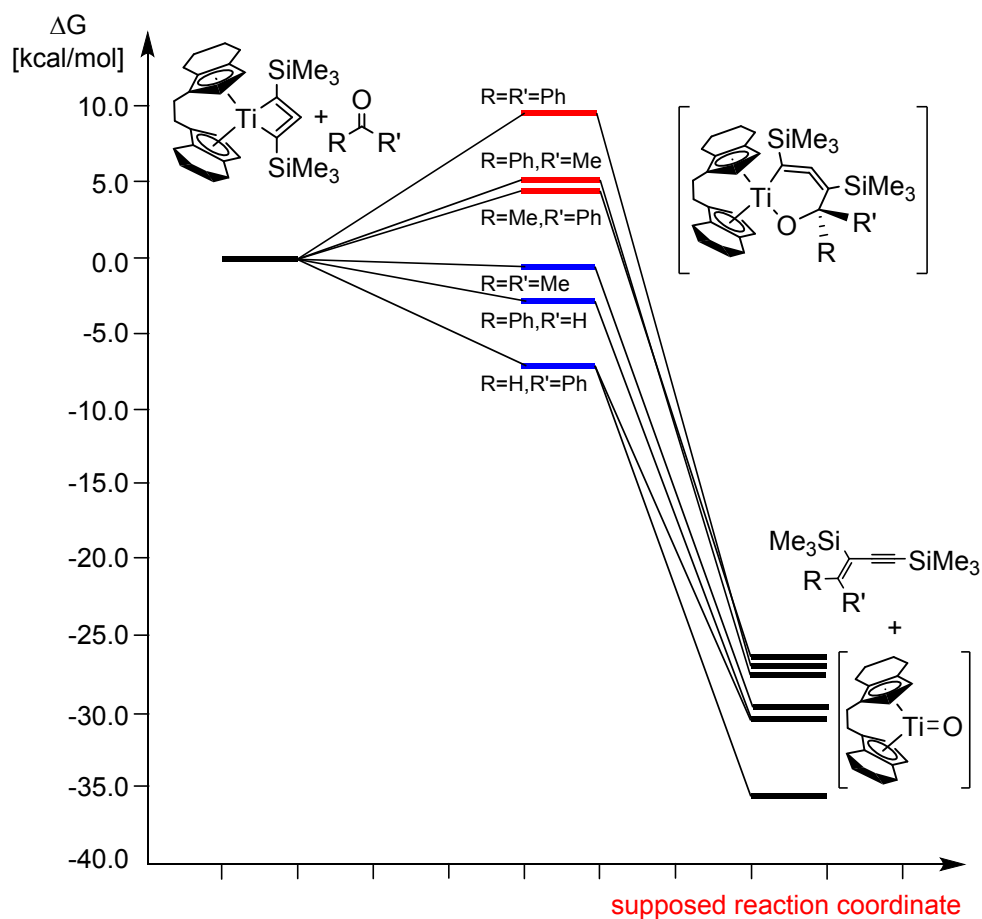

**Figure S48:** Representation of the thermodynamic Gibbs free energy alongside the supposed reaction pathway from complex **2** to enynes.

**Table S11:** Summary of thermodynamic parameters.

|                       |                                                          |                                        |
|-----------------------|----------------------------------------------------------|----------------------------------------|
| C2H6 Ethane           | HF=-79,8519427<br>ZPE=45,52819<br>NImag=0                | Htot=-79,774926<br>Gtot=-79,800838     |
| Acetone               | HF= -193.2237985<br>ZPE= 50.81801 (Kcal/Mol)<br>NImag=0  | Htot= -193.136440<br>Gtot= -193.170881 |
| Acetophenone          | HF= -385.0174121<br>ZPE= 83.61406 (Kcal/Mol)<br>NImag=0  | Htot= -384.875097<br>Gtot= -384.917243 |
| Benzophenone          | HF= -576.8079739<br>ZPE= 116.08201 (Kcal/Mol)<br>NImag=0 | Htot= -576.610865<br>Gtot= -576.661001 |
| Benzaldehyde          | HF= -345.6852963<br>ZPE= 66.55884 (Kcal/Mol)<br>NImag=0  | Htot= -345.571757<br>Gtot= -345.609941 |
| Me(TMS)C=C=C(TMS)(Me) | HF=-1012,8327909<br>ZPE=192,25751<br>NImag=0             | Htot=-1012,502676<br>Gtot=-1012,577370 |

|  |                                                           |                                          |
|--|-----------------------------------------------------------|------------------------------------------|
|  | HF= -1050.9348361<br>ZPE= 195.68328 (Kcal/Mol)<br>NImag=0 | Htot= -1050.598446<br>Gtot= -1050.676060 |
|  | HF= -1434.5150429<br>ZPE= 260.27013 (Kcal/Mol)<br>NImag=0 | Htot= -1434.069446<br>Gtot= -1434.162765 |
|  | HF= -1242.7244853<br>ZPE= 228.02910 (Kcal/Mol)<br>NImag=0 | Htot= -1242.333461<br>Gtot= -1242.419220 |
|  | HF= -1242.723095<br>ZPE= 227.90959 (Kcal/Mol)<br>NImag=0  | Htot= -1242.332141<br>Gtot= -1242.418703 |
|  | HF= -1203.3978355<br>ZPE= 211.10773 (Kcal/Mol)<br>NImag=0 | Htot= -1203.035395<br>Gtot= -1203.117620 |
|  | HF= -1203.4063125<br>ZPE= 211.26345 (Kcal/Mol)<br>NImag=0 | Htot= -1203.043646<br>Gtot= -1203.126143 |
|  | HF= -1865.944713<br>ZPE= 211.26345 (Kcal/Mol)<br>NImag=0  | Htot= -1865.440132<br>Gtot= -1865.554355 |
|  | HF= -910.3218793<br>ZPE= 239.12409 (Kcal/Mol)<br>NImag=0  | Htot= -909.919892<br>Gtot= -909.988009   |
|  | HF= -910.2686683<br>ZPE= 238.20775 (Kcal/Mol)<br>NImag=0  | Htot= -909.867827<br>Gtot= -909.938284   |

|                                                                                                                                          |                                                           |                                          |
|------------------------------------------------------------------------------------------------------------------------------------------|-----------------------------------------------------------|------------------------------------------|
| 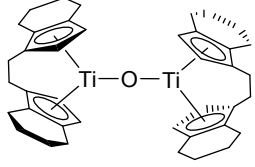 <p>singlet</p>                                         | HF= -1745.3725286<br>ZPE= 476.95459 (Kcal/Mol)<br>NImag=0 | Htot= -1744.571429<br>Gtot= -1744.681366 |
|  <p>triplet</p>                                         | HF= -1745.3961018<br>ZPE= 477.36710 (Kcal/Mol)<br>NImag=0 | Htot= -1744.594394<br>Gtot= -1744.704846 |
|                                                         | HF=-525,2039434<br>ZPE=145,00863<br>NImag=0               | Htot=-524,957105<br>Gtot= -525,011891    |
|                                                        | HF=-1378,3420582<br>ZPE=247,43795<br>NImag=0              | Htot=-1377,917117<br>Gtot=-1378,006339   |
|                                                       | HF=-1378,3382555<br>ZPE= 246,58001<br>NImag=0             | Htot= -1377,914017<br>Gtot= -1378,007893 |
|                                                       | HF=-914.8469143<br>ZPE=281.21685<br>NImag=0               | Htot=-914.375636<br>Gtot= -914,444743    |
|                                                       | HF=-1767.9906562<br>ZPE=383.54489<br>NImag=0              | Htot=-1767,340175<br>Gtot= -1767,446884  |
|  <p>Singlet geometry, single point<br/>as triplet</p> | HF= -1767.9679173<br>ZPE=383.34087 (Kcal/Mol)<br>NImag=0  | Htot= -1767.317685<br>Gtot= -1767.426070 |
|                                                       | HF=-1767.9782131<br>ZPE=382.82091<br>NImag=0              | Htot= -1767.328571<br>Gtot= -1767.437064 |

|                                                                                                                                                              |                                                           |                                          |
|--------------------------------------------------------------------------------------------------------------------------------------------------------------|-----------------------------------------------------------|------------------------------------------|
| 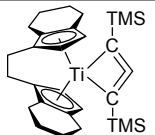 <p>Triplet geometry, single point<br/>as singlet</p>                       | HF=-1767.9805115<br>ZPE=382.58993 (Kcal/Mol)<br>NImag=0   | Htot= -1767.330883<br>Gtot= -1767.439852 |
|  <p>Singlet start geometry, BP86<br/>opt freq<br/>with guess=mix input</p>  | HF= -1767.9908489<br>ZPE= 383.91670 (Kcal/Mol)<br>NImag=0 | Htot= -1767.339949<br>Gtot= -1767.445652 |
|  <p>Singlet start geometry, UBP86<br/>opt freq<br/>with guess=mix input</p> | HF= -1767.9908489<br>ZPE= 383.91669 (Kcal/Mol)<br>NImag=0 | Htot= -1767.339949<br>Gtot= -1767.445652 |
|                                                                            | HF=-513,7210902<br>ZPE= 144,24004<br>NImag=0              | Htot= -513,474949<br>Gtot= -513,532270   |
|                                                                           | HF=-1366,8563606<br>ZPE=247,15003<br>NImag=0              | Htot=-1366,431492<br>Gtot=-1366,522257   |
|                                                                           | HF=-1366,8414822<br>ZPE= 246,51335<br>NImag=0             | Htot= -1366,417185<br>Gtot= -1366,512687 |
|                                                                           | HF=-903.3606657<br>ZPE=279.98144<br>NImag=0               | Htot=-902.889729<br>Gtot= -902,963903    |
|                                                                           | HF=-1756.5003188<br>ZPE=382.83983<br>NImag=0              | Htot=-1755,850499<br>Gtot= -1755,958966  |
|                                                                           | HF=-1756.4780548<br>ZPE=381.82002<br>NImag=0              | Htot= -1755,829347<br>Gtot= -1755,941757 |

|                                                                                                                                                                                                                                        |                                                                              |                                          |
|----------------------------------------------------------------------------------------------------------------------------------------------------------------------------------------------------------------------------------------|------------------------------------------------------------------------------|------------------------------------------|
| 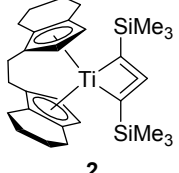 <p><b>2</b></p>                                                                                                                                      | HF= -1767.9906562<br>ZPE= 383.54489 (Kcal/Mol)<br>NImag=0<br><br>C2 Symmetry | Htot= -1767.340175<br>Gtot= -1767.446884 |
|  <p>HF=-1767.95<br/>Start geometry optimised as</p>  <p><b>2</b></p> | HF= -1767.9907818<br>ZPE= 383.93788 (Kcal/Mol)<br>NImag=0<br><br>C1 Symmetry | Htot= -1767.339917<br>Gtot= -1767.446318 |
|                                                                                                                                                      | HF= -1961.2436841<br>ZPE= 437.24401 (Kcal/Mol)<br>NImag=0                    | Htot= -1960.502681<br>Gtot= -1960.618499 |
|                                                                                                                                                     | HF= -2344.8111197<br>ZPE= 500.91349 (Kcal/Mol)<br>NImag=0                    | Htot= -2343.961642<br>Gtot= -2344.094280 |
|                                                                                                                                                     | HF= -2153.0280928<br>ZPE= 469.23912 (Kcal/Mol)<br>NImag=0                    | Htot= -2152.232710<br>Gtot= -2152.356475 |
|                                                                                                                                                     | HF= -2153.02614<br>ZPE= 469.06816 (Kcal/Mol)<br>NImag=0                      | Htot= -2152.230925<br>Gtot= -2152.356133 |
|  <p><b>a</b></p>                                                                                                                                    | HF= -2113.7122202<br>ZPE= 452.18786 (Kcal/Mol)<br>NImag=0                    | Htot= -2112.945347<br>Gtot= -2113.068197 |
|  <p><b>e</b></p>                                                                                                                                    | HF= -2113.7050992<br>ZPE= 452.38696 (Kcal/Mol)<br>NImag=0                    | Htot= -2112.938017<br>Gtot= -2113.059902 |

|                                                                                     |                                                           |                                          |
|-------------------------------------------------------------------------------------|-----------------------------------------------------------|------------------------------------------|
|    | HF= -1961.2050267<br>ZPE= 436.26944 (Kcal/Mol)<br>NImag=0 | Htot= -1960.465217<br>Gtot= -1960.582759 |
|    | HF= -2344.7728195<br>ZPE= 500.41193 (Kcal/Mol)<br>NImag=0 | Htot= -2343.924130<br>Gtot= -2344.056686 |
|    | HF= -2152.9894179<br>ZPE= 467.91843 (Kcal/Mol)<br>NImag=0 | Htot= -2152.195462<br>Gtot= -2152.322691 |
|    | HF= -2152.993494<br>ZPE= 468.02333 (Kcal/Mol)<br>NImag=0  | Htot= -2152.199549<br>Gtot= -2152.326093 |
|   | HF= -2113.6769363<br>ZPE= 450.78626 (Kcal/Mol)<br>NImag=0 | Htot= -2112.911644<br>Gtot= -2113.037418 |
|  | HF= -2113.6710247<br>ZPE= 451.15989 (Kcal/Mol)<br>NImag=0 | Htot= -2112.905523<br>Gtot= -2113.029318 |

### 7.3. MO and DFT studies of *rac*-(*ebthi*)TiC<sub>3</sub>(SiMe<sub>3</sub>)<sub>2</sub> (**2**)

To obtain a better understanding of the bonding situation in titana-cyclobutadiene **2**, several single-point calculations were performed: firstly, the Kohn-Sham (KS) wave function was recalculated using the pure DF BP86 in conjunction with the def2-TZVP basis on all atoms; secondly, a hybrid DF was employed (B3LYP<sup>12a,13</sup>/def2-TZVP); and lastly, the canonical MOs were calculated at the HF/def2-TZVP level of theory. All (KS) wave functions were tested with respect to RHF/UHF or RKS/UKS instabilities, in order to analyse the biradical character of Ti complex **2**. While the KS wave function based on the pure DF (BP86) showed no instabilities, the hybrid DF (B3LYP) and HF solution exhibited a low-lying, “broken-symmetry” open-shell singlet state. This kind of behaviour is often observed if the biradical character is not too large,<sup>22</sup> since part of the non-dynamic correlation is treated by the exchange-correlation functional of the (pure) density functional. Mixing in exact exchange reduces the amount of non-dynamic correlation treated by the DF and thus the “broken-symmetry” solution becomes more stable.

In consequence, structures that were optimised using the BP86 functional are expected to show good agreement with experimental structures (as verified by comparison with structural data from single-crystal X-ray diffraction, *cf.* Table S12). The electronic energy, however, should be considered as a rough approximation due to incorrect treatment of the non-dynamic correlation.

**Table S12:** Comparison of experimental and calculated structural data of **2**.

|                     | SC-XRD     | BP86/LANL2DZ/TZVP |        | BS-UB3LYP/def2-TZVP |        |
|---------------------|------------|-------------------|--------|---------------------|--------|
| Ti1–C1              | 2.2287(14) | 2.250             | +0.021 | 2.332               | +0.103 |
| Ti1–C3              | 2.2349(15) | 2.250             | +0.015 | 2.332               | +0.097 |
| C1–C2               | 1.303(2)   | 1.316             | +0.013 | 1.298               | –0.005 |
| C2–C3               | 1.308(2)   | 1.316             | +0.008 | 1.298               | –0.010 |
| C1–Si1              | 1.8370(15) | 1.866             | +0.029 | 1.846               | +0.009 |
| C3–Si2              | 1.8326(16) | 1.866             | +0.033 | 1.846               | +0.013 |
| Ti1–C1–C2           | 74.94(9)   | 70.39             | –4.55  | 69.53               | –5.41  |
| Ti1–C3–C2           | 75.15(9)   | 70.39             | –4.76  | 69.53               | –5.62  |
| Si1–C1–C2           | 136.71(12) | 133.83            | –2.88  | 138.04              | +1.33  |
| Si2–C3–C2           | 134.80(13) | 133.83            | –0.97  | 138.04              | +3.24  |
| Σ( <sup>4</sup> C1) | 352.7(3)   | 353.19            | +0.49  | 357.32              | +4.62  |
| Σ( <sup>4</sup> C3) | 353.7(3)   | 353.19            | –0.51  | 357.32              | +3.62  |
| C1–C2–C3            | 150.08(15) | 150.37            | +0.29  | 155.09              | +5.01  |
| Si1–C1–C3–Si2       | 68.0(2)    | 63.04             | –4.96  | 41.55               | –26.45 |



#### 7.4. Biradical character

The “broken-symmetry” solution is not a true eigenfunction of the  $S^2$  operator. In fact, it may be considered as a 50:50 mixture of the singlet and triplet state, if the overlap between the singly occupied orbitals and spin polarisation are small.<sup>23,24,25</sup> The actual singlet wave function can then be expressed in terms of a linear combination of two “broken-symmetry” wave functions

$${}^1\Psi = \frac{1}{\sqrt{2}}(|\cdots\chi_+\bar{\chi}_-\rangle - |\cdots\bar{\chi}_+\chi_-\rangle)$$

where  $\chi_+$ ,  $\chi_-$  are the singly occupied orbitals and the overline indicates  $\beta$  spin. Therefore, the open-shell singlet must be described by a multi-reference wave function.

In the “broken-symmetry” picture, the singly occupied orbitals  $\chi_+$  and  $\chi_-$  are, in principle, localised orbitals formed by linear combinations of the (delocalised) canonical HOMO  $\phi_H$  and LUMO  $\phi_L$ :

$$\chi_{\pm} = \frac{1}{\sqrt{2}}(\phi_H \pm \phi_L)$$

Hence, the multi-reference wave function expressed in terms of the canonical MOs is given by

$${}^1\Psi = c_1|\cdots\phi_H^2\rangle + c_2|\cdots\phi_L^2\rangle$$

where the expansion coefficients  $c_i$  are the square roots of the relative weight of each determinant. This type of multi-determinant open-shell singlet wave function can be obtained by the Complete Active Space (CAS) SCF method<sup>21–29</sup> and gives a qualitatively correct description of the electronic structure of a biradical. The biradical character can be evaluated as

$$\beta = \frac{2c_2^2}{c_1^2 + c_2^2}$$

where a value of  $\beta = 1$  indicates a “perfect” biradical with two electrons in two degenerate orbitals.<sup>24,26</sup> Smaller values indicate an increasing energy gap between HOMO and LUMO, and  $\beta \rightarrow 0$  indicates a closed-shell species.

Consequently, the smallest active space to properly describe a biradical is a CAS(2,2) calculation (*i.e.* two electrons in two orbitals). In case of compound **2**, we chose to include eight electrons in nine orbitals in the active space (comprising the formal  $\pi$  orbitals at the ligand and d-orbitals at Ti, *vide infra*), as these orbitals are energetically relatively closely spaced. The calculations show that the largest contributions to the multi-determinant wave function are the two determinants placing two electrons either in the formal HOMO ( $\phi_4$ ) or LUMO ( $\phi_5$ , Figure S49;  $\beta = 28\%$ ).

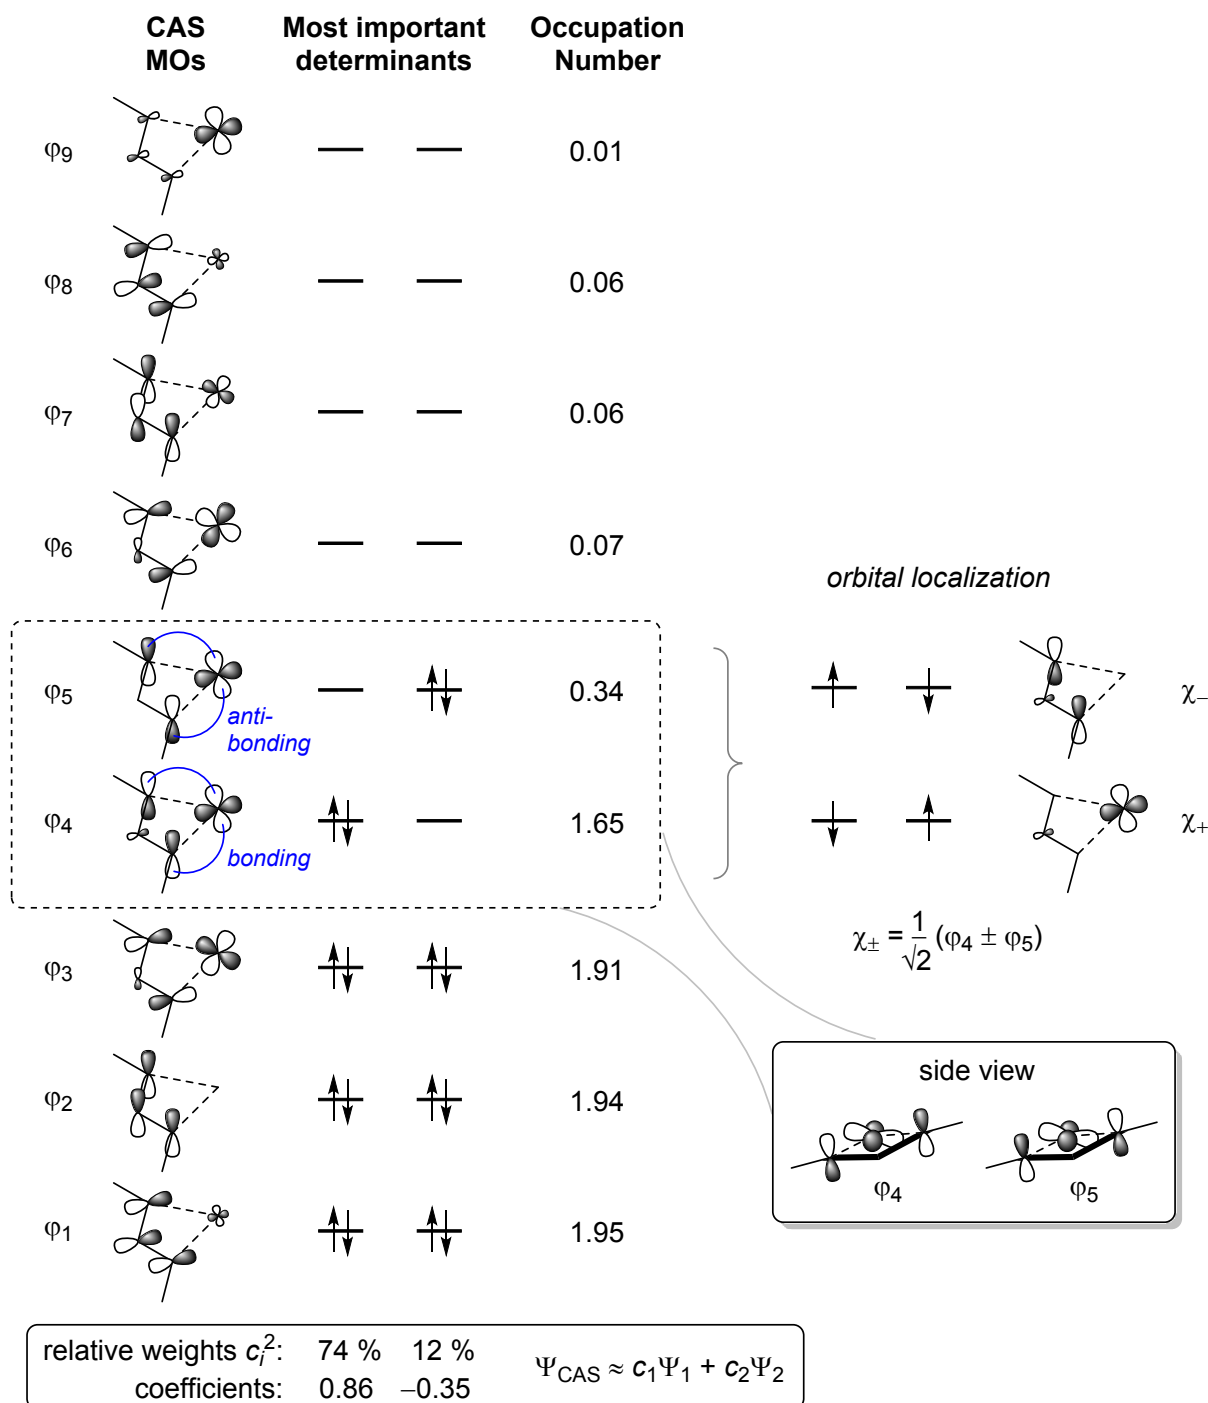

**Figure S49:** Schematic depiction of the active orbitals of a CAS(8,9) calculation. Only contributions to the wave function with relative weights > 1 % are shown. The orbital localisation scheme indicates that one of the radical centres is localised at Ti, while the other is delocalised across the  $C_3$  backbone.

Hence, compound **2** can be regarded as a biradical. The singlet state is calculated to be the ground state ( $\Delta E_{S-T} = -39.0$  kJ/mol); i.e. the radical centres are antiferromagnetically coupled. The calculated exchange coupling constant<sup>27</sup> is

$$2J = E_S - E_T = -3260.1 \text{ cm}^{-1}$$

The radical centres are localised at Ti and on the  $C_3$  backbone of the ligand (Figure S49, right). Therefore, the electronic structure can be understood as a complex between a formal Ti(III) fragment and an organic radical, whose “free” electrons are antiferromagnetically coupled. (This, by the way, is also indicated by the BS-B3LYP calculations; however, these results will not be discussed further as BS

calculations predict unphysical spin polarisation.) Therefore, complex **2** should be EPR silent in its ground state.

### 7.5. Lewis resonance scheme

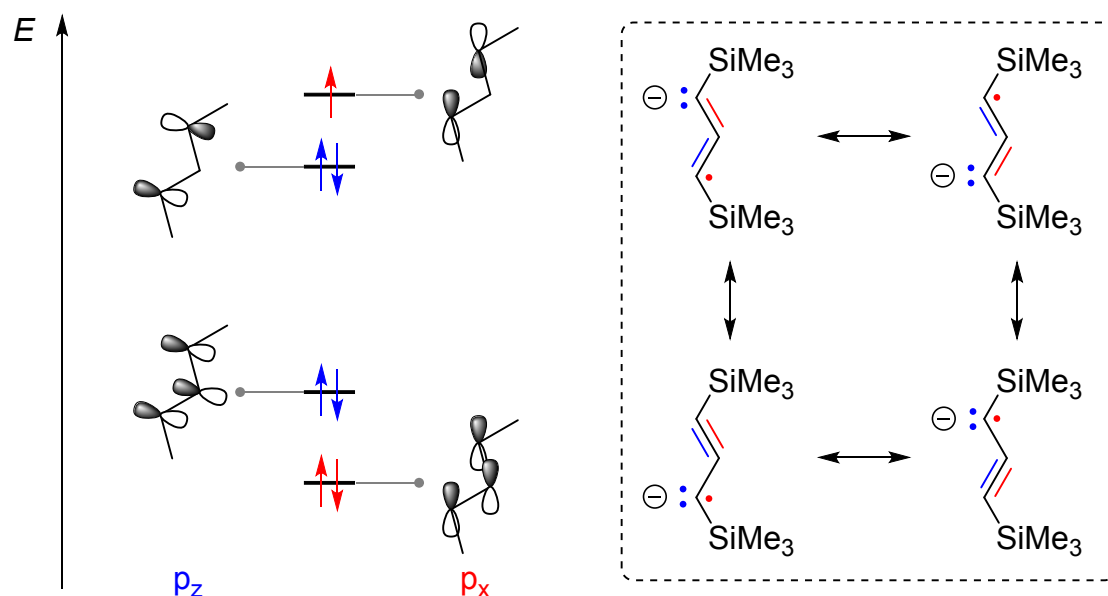

**Figure S50:** Left: Schematic MO diagram of the formal  $\pi$ -type orbitals of the ligand system. There is a  $4e3c$  bond in the  $z$  plane (blue) and a  $3e3c$  bond in the  $x$  plane (red). Right: Lewis resonance scheme. The electrons in  $p_z$  ( $p_x$ ) orbitals are indicated in blue (red). Each  $\pi$ -bonding system is independently delocalized across the  $C_3$  unit.

Analysis of the ligand-centred orbitals shows that there are two formal  $\pi$  bonding systems. One of them is *in-plane* with the  $TiC_3$  ring system and acts as  $\sigma$  donor ( $\phi_1, \phi_3, \phi_6, \phi_8$ ); the other is perpendicular to the ring and contains the delocalised radical centre ( $\phi_2, \phi_4, \phi_5, \phi_7$ ). The ligand could be considered as a propadienylide anion, i.e. the one-electron reduced congener of propynylidene,<sup>28</sup> which is corroborated by the fact that the ligand-centred orbitals in the complex nicely correspond to the MOs of the isolated ligand system (Figure S50). Note that the electrons in both the formal  $\pi_x$  and  $\pi_z$  bonding systems are delocalized across the  $C_3$  unit and that each of these  $\pi$ -bonding systems can be interpreted independently of the other, resulting in a variety of different Lewis resonance structures.

Therefore, the leading resonance structures of complex **2** are proposed as depicted in Scheme S2.

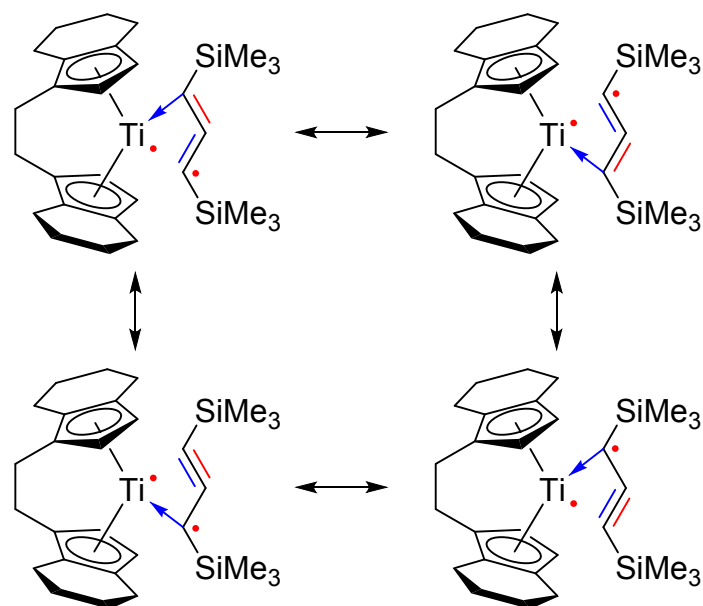

**Scheme S2:** Leading Lewis resonance structures of complex **2**. The electrons associated with the  $p_z$  and  $p_x$  orbitals are indicated in blue and red, respectively. Formal charges omitted for clarity.

## 7.6. NBO analysis

NBO analyses<sup>19</sup> of the BP86/def2-TZVP and CAS(8,9)/def2-TZVP densities led to similar results. The NBO routine found a double bond between both C1 and C2 as well as C2 and C3, in agreement with the Lewis structures in Scheme S2. It is worthy to note that both  $\pi$ -type NBOs are only occupied by approx. 1.6 electrons, indicating that the double bonds are delocalised. Furthermore, there are formally two Ti–C  $\sigma$ -bonds (Ti1–C1 and Ti1–C3) which are occupied by 1.5 electrons each. This can be attributed to both the delocalisation of the Ti–C bond (*vide supra*) as well as the biradical character, which is not well represented in the NBO picture.

The calculated natural charge of the  $C_3(SiMe_3)_2$  ligand amounts to  $-0.39 e$  (CAS) or  $-0.64 e$  (BP86), which is in the expected range of a formally anionic ligand.

## 7.7. QT-AIM analysis

QT-AIM analysis<sup>29</sup> revealed two Ti–C “bond” paths (Ti1–C1 and Ti1–C3), in agreement with the Lewis resonance scheme (Scheme S2). Despite the short interatomic distance between Ti1 and C2, there is no strong bonding interaction between those atoms; on the contrary, a ring critical point is found near the centre of the  $TiC_3$  ring system (i.e. there is a minimum in electron density within the ring plane). Moreover, the Laplacian of the electron density  $\nabla^2 r$  indicates that the Ti–C bonds are strongly polarised towards the C atoms, in agreement with their description as dative bonds. (Figure S51).

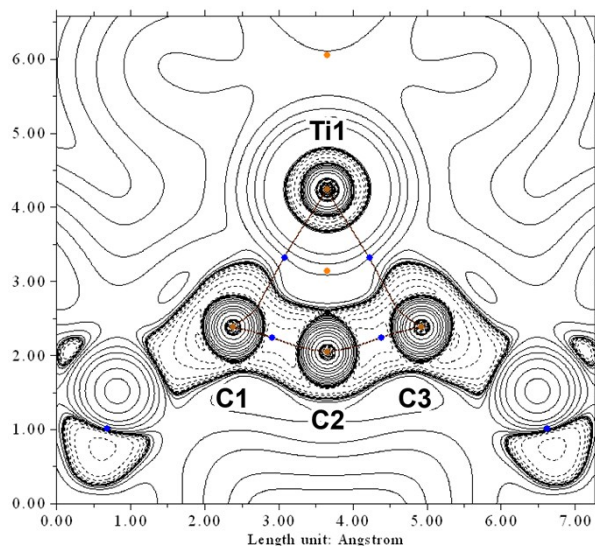

**Figure S51:** Contour plot of the Laplacian of the electron density  $\nabla^2 r$  of Ti complex **1** in the  $\text{TiC}_3$  ring plane. Dashed lines indicate negative (local charge concentration), solid lines indicate positive values (local charge depletion). The Laplacian plot is overlaid with the molecular graph from QT-AIM analysis. Brown lines indicate bonding paths, blue dots correspond to bond critical points, orange points indicate ring critical points. Density from CAS(8,9)/def2-TZVP calculation.

The densities obtained from CAS(8,9) and BP86 calculations are quite similar, indicating that the pure DFT method is suitable to approximately describe the electron density despite its single-determinant character (Figure S52)

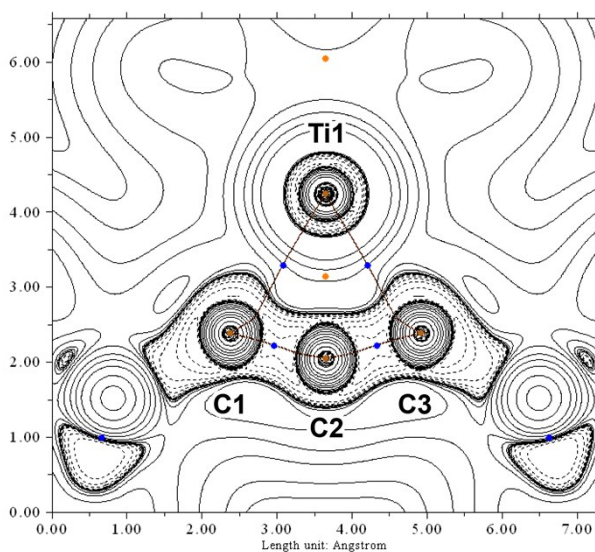

**Figure S52:** Same as Figure S51, but density taken from BP86/def2-TZVP calculation.

## 7.8. Electron Localisation Function

The results from QT-AIM analysis are corroborated by ELF analysis (Figure S53). There is no localised electron density in the valence region of C2 directed towards Ti1, whereas the bonding electrons between C1/C3 and Ti are localised in approx. the same region of space as indicated by the Laplacian of the electron density. It is worthy to note that there is no localised electron density around C2

pointing *away* from Ti1 either, i.e. there is no lone pair of electrons at the central carbon atom. Consequently, the electronic structure of the  $C_3$  scaffold is different from that of structurally related bent allenes, such as so-called “carbodicarbenes” (Figure S54).<sup>30</sup>

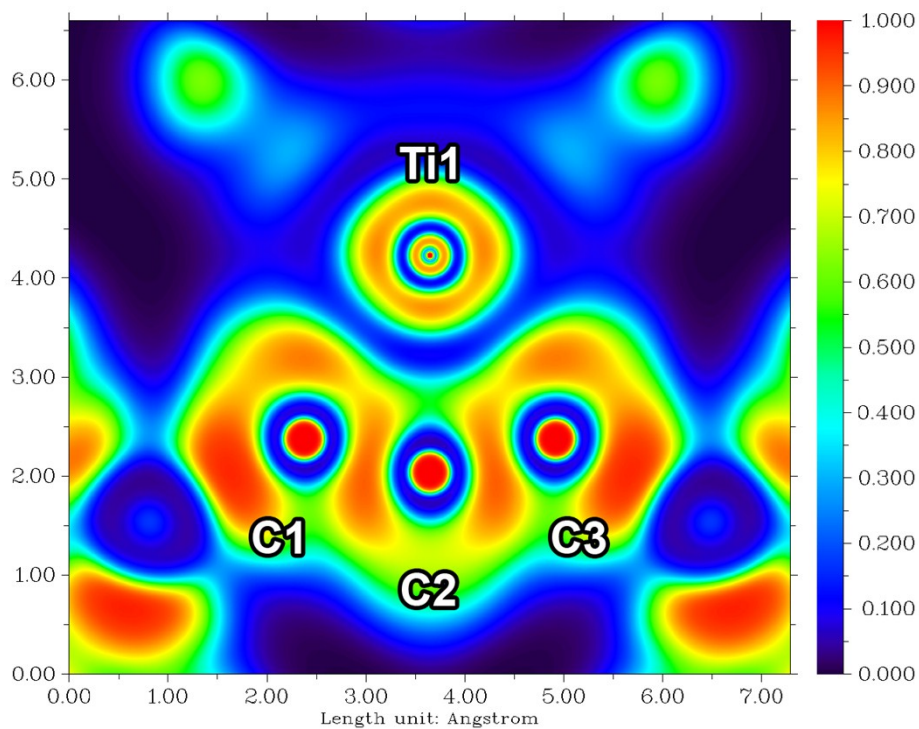

**Figure S53:** ELF plot of Ti complex **2** in the  $TiC_3$  ring plane.

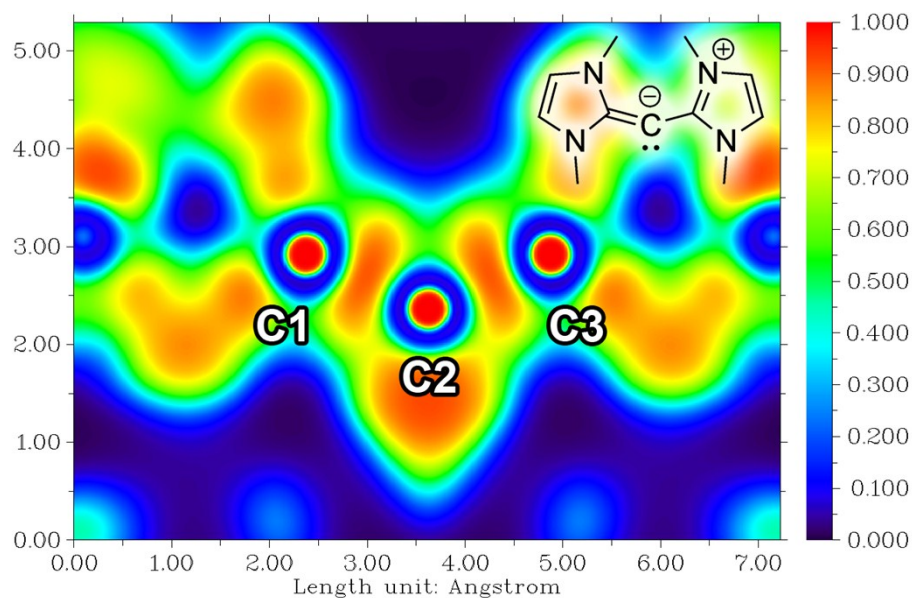

**Figure S54:** ELF plot of a “carbodicarbene” in the  $C_3$  plane. The lone pair of electrons is clearly visible at C2.

## 7.9. CAS computations of $\text{Cp}_2\text{TiC}_3(\text{SiMe}_3)_2$ (**2Cp**) and $\text{Cp}^*_2\text{TiC}_3(\text{SiMe}_3)$ (**2Cp\***)

CAS(8,9)/def2-TZVP computations were carried out in an analogous manner for the closely related Ti complexes  $\text{Cp}_2\text{TiC}_3(\text{SiMe}_3)_2$  (**2Cp**) and  $\text{Cp}^*_2\text{TiC}_3(\text{SiMe}_3)$  (**2Cp\***). A summary of the results is shown in Table S13.

**Table S13:** Results of CAS(8,9)/def2-TZVP single point calculations for **2**, **2Cp**, and **2Cp\***.

| Compound         | $\theta$ [%] | $\Delta E_{S-T}$ [kJ/mol] | $2J$ [ $\text{cm}^{-1}$ ] | $\Sigma^4(\text{C1/C3})$ [ $^\circ$ ] |
|------------------|--------------|---------------------------|---------------------------|---------------------------------------|
| <b>2</b> (EBTHI) | 28           | -39.0                     | -3260                     | 353.2                                 |
| <b>2Cp</b>       | 30           | -36.2                     | -3025                     | 357.1                                 |
| <b>2Cp*</b>      | 74           | -7.4                      | -616                      | 359.4                                 |

It should be pointed out that the singlet-triplet gap and therefore the biradical character greatly depend on the pyramidalisation of the carbon atoms C1 and C3 of the  $\text{TiC}_3$  ring system. Since the coordination environment around C1/C3 is nearly planar in compound **2Cp\*** (most likely due to steric reasons), it displays the highest biradical character. This trend is in agreement with previous computations.<sup>31</sup>

## 8. Literature

- [1] Reiß, F.; Reiß, M.; Spannenberg, A.; Jiao, H.; Baumann, W.; Arndt, P.; Rosenthal, U.; Beweries, T. *Chem. Eur. J.* **2018**, *24*, 5667-5674.
- [2] Gottlieb, H. E.; Kotlyar, V.; Nudelman, A. *J. Org. Chem.* **1997**, *62*, 7512.
- [3] Sheldrick, G. M. *Acta Cryst.* **2008**, *A64*, 112-122.
- [4] Sheldrick, G. M. *Acta Cryst.* **2015**, *C71*, 3-8
- [5] Diamond - Crystal and Molecular Structure Visualization, Crystal Impact - Dr. H. Putz & Dr. K. Brandenburg GbR, Kreuzherrenstr. 102, 53227 Bonn, Germany, <http://www.crystalimpact.com/diamond>.
- [6] Gaussian 09, Revision E.01, M. J. Frisch, G. W. Trucks, H. B. Schlegel, G. E. Scuseria, M. A. Robb, J. R. Cheeseman, G. Scalmani, V. Barone, B. Mennucci, G. A. Petersson, H. Nakatsuji, M. Caricato, X. Li, H. P. Hratchian, A. F. Izmaylov, J. Bloino, G. Zheng, J. L. Sonnenberg, M. Hada, M. Ehara, K. Toyota, R. Fukuda, J. Hasegawa, M. Ishida, T. Nakajima, Y. Honda, O. Kitao, H. Nakai, T. Vreven, J. A. Montgomery, Jr., J. E. Peralta, F. Ogliaro, M. Bearpark, J. J. Heyd, E. Brothers, K. N. Kudin, V. N. Staroverov, T. Keith, R. Kobayashi, J. Normand, K. Raghavachari, A. Rendell, J. C. Burant, S. S. Iyengar, J. Tomasi, M. Cossi, N. Rega, J. M. Millam, M. Klene, J. E. Knox, J. B. Cross, V. Bakken, C. Adamo, J. Jaramillo, R. Gomperts, R. E. Stratmann, O. Yazyev, A. J. Austin, R. Cammi, C. Pomelli, J. W. Ochterski, R. L. Martin, K. Morokuma, V. G. Zakrzewski, G. A. Voth, P. Salvador, J. J. Dannenberg, S. Dapprich, A. D. Daniels, O. Farkas, J. B. Foresman, J. V. Ortiz, J. Cioslowski, and D. J. Fox, Gaussian, Inc., Wallingford CT, **2013**.
- [7] McCullough, L. G.; Listemann, M. L.; Schrock, R. R.; Churchill, M. R.; Ziller, J. W. *J. Am. Chem. Soc.* **1983**, *105*, 6729-6730.
- [8] McCullough, L. G.; Schrock, R. R.; Dewan, J. C.; Murdzek, J. C. *J. Am. Chem. Soc.* **1985**, *107*, 5987-5998.
- [9] Heppekausen, J.; Stade, R.; Kondoh, A.; Seidel, G.; Goddard, R.; Fürstner, A. *Chem. Eur. J.* **2012**, *18*, 10281-10299.
- [10] March, J. *Advanced Organic Chemistry, 2. Edition*, McGraw-Hill, Tokyo, **1977**.
- [11] Pyykkö, P.; Atsumi, M. *Chem. Eur. J.* **2009**, *15*, 12770-12779
- [12] a) Becke, A. D. *Phys. Rev. A* **1988**, *38*, 3098-3100; b) Perdew, J. P. *Phys. Rev. B* **1986**, *33*, 8822-8824.
- [13] a) Vosko, S. H.; Wilk, L.; Nusair, M. *Can. J. Phys.* **1980**, *58*, 1200-1211; b) Lee, C.; Yang, W.; Parr, R. G. *Phys. Rev. B* **1988**, *37*, 785-789; c) Miehlich, B.; Savin, A.; Stoll, H.; Preuss, H. *Chem. Phys. Lett.* **1989**, *157*, 200-206; d) Becke, A. D. *J. Chem. Phys.* **1993**, *98*, 5648-5652.
- [14] Adamo, C.; Barone, V. *J. Chem. Phys.* **1999**, *110*, 6158-6169.
- [15] Weigend, F.; Ahlrichs, R. *Phys. Chem. Chem. Phys.* **2005**, *7*, 3297-3305.
- [16] Schäfer, A.; Huber, C.; Ahlrichs, R. *J. Chem. Phys.* **1994**, *100*, 5829-5835.
- [17] a) Hay, P. J.; Wadt, W. R. *J. Chem. Phys.* **1985**, *82*, 270-283; b) Hay, P. J.; Wadt, W. R. *J. Chem. Phys.* **1985**, *82*, 299-310.
- [18] a) Kendall, R. A.; Dunning Jr., T. H.; Harrison, R. J. *J. Chem. Phys.* **1992**, *96*, 6796-6806; b) Woon, D. E.; Dunning Jr., T. H. *J. Chem. Phys.* **1993**, *98*, 1358-1371.
- [19] a) E. D. Glendening, J. K. Badenhoop, A. E. Reed, J. E. Carpenter, J. A. Bohmann, C. M. Morales, C. R. Landis, F. Weinhold, 2013 (NBO 6.0); b) Carpenter, J. E.; Weinhold, F. *J. Mol. Struct.: THEOCHEM* **1988**, *169*, 41-62; c) Weinhold, F.; Carpenter, J. E. *The Structure of Small Molecules and Ions*, Plenum Press, **1988**; d) Weinhold, F.; Landis, C. R. *Valency and Bonding. A Natural*



*Bond Orbital Donor-Acceptor Perspective*, Cambridge University Press, **2005**.

- [20] Lu, T.; Chen, F. *J. Comput. Chem.* **2012**, *33*, 580–592.
- [21] Reiß, F.; Reiß, M.; Spannenberg, A.; Jiao, H.; Hollmann, D.; Arndt, P.; Rosenthal, U.; Beweries, T. *Chem. Eur. J.* **2017**, *23*, 14158–14162.
- [22] Hegarty, D.; Robb, M. A. *Mol. Phys.* **1979**, *38*, 1795–1812.
- [23] Cramer, C. J. *Essentials of Computational Chemistry: Theories and Models*, John Wiley & Sons, Ltd, Chichester, UK, **2004**.
- [24] Salem, L.; Rowland, C. *Angew. Chem. Int. Ed. Engl.* **1972**, *11*, 92–111.
- [25] Malrieu, J.-P.; Trinquier, G. *J. Phys. Chem. A* **2012**, *116*, 8226–8237.
- [26] Miliordos, E.; Ruedenberg, K.; Xantheas, S. S. *Angew. Chem. Int. Ed.* **2013**, *52*, 5736–5739.
- [27] a) Noodleman, L. *J. Chem. Phys.* **1981**, *74*, 5737–5743; b) Herebian, D.; Wieghardt, K. E.; Neese, F. *J. Am. Chem. Soc.* **2003**, *125*, 10997–11005; c) Abe, M. *Chem. Rev.* **2013**, *113*, 7011–7088.
- [28] a) Seburg, R. A.; McMahan, R. J. *Angew. Chem. Int. Ed. Engl.* **1995**, *34*, 2009–2012; b) Seburg, R. A.; Patterson, E. V.; McMahan, R. J. *J. Am. Chem. Soc.* **2009**, *131*, 9442–9455.
- [29] a) Bader, R. F. W. *Acc. Chem. Res.* **1985**, *18*, 9–15; b) Bader, R. F. W. *Chem. Rev.* **1991**, *91*, 893–928; c) Bader, R. F. W. *Atoms in Molecules: A Quantum Theory*, Oxford University Press, **1994**; d) Bader, R. F. W. *Monatsh. Chem.* **2005**, *136*, 819–854.
- [30] a) Tonner, R.; Frenking, G. *Angew. Chem. Int. Ed.* **2007**, *46*, 8695–8698; b) Dyker, C. A.; Lavallo, V.; Donnadiou, B.; Bertrand, G. *Angew. Chem. Int. Ed.* **2008**, *47*, 3206–3209.
- [31] Roy, S.; Jemmis, E. D.; Schulz, A.; Beweries, T.; Rosenthal, U. *Angew. Chem. Int. Ed.* **2012**, *51*, 5347–5350.
